# Supplementary material
Source: PubMed Central journal article supplement (PMC3013041)
Supplement: supp_M110.156877_jbc.M110.156877-3.pdf [file supp_M110.156877_jbc.M110.156877-3.pdf]

A : Proteins with altered tyrosine phosphorylation

| GeneID | Symbol     | Name                                                                | Cell | Ligand | change  | fold change (vs control) |      |       |      |       |        | Accession | Sequence     | Modifications |       |
|--------|------------|---------------------------------------------------------------------|------|--------|---------|--------------------------|------|-------|------|-------|--------|-----------|--------------|---------------|-------|
|        |            |                                                                     |      |        |         | 0min                     | 1min | 2min  | 5min | 10min | 30min  |           |              |               | 60min |
| 58     | ACTA1      | actin, alpha 1, skeletal muscle                                     | TamR | E2     | down    | 1.00                     | NA   | 0.72  | NA   | NA    | 0.56   | NA        | NP_001091    | n.d.          | n.d.  |
| 60     | ACTB       | beta actin                                                          | WT   | E2     | down    | 1.00                     | 0.83 | 0.67  | 0.62 | 0.59  | 0.57   | 0.44      | NP_001092    | n.d.          | n.d.  |
| 60     | ACTB       | beta actin                                                          | TamR | HRG    | down    | 1.00                     | NA   | NA    | 0.60 | NA    | NA     | 0.40      | NP_001092    | n.d.          | n.d.  |
| 345651 | ACTBL2     | actin, beta-like 2                                                  | WT   | E2     | down    | 1.00                     | 0.73 | 0.53  | 0.56 | 0.39  | 0.43   | 0.45      | NP_001017992 | n.d.          | n.d.  |
| 345651 | ACTBL2     | actin, beta-like 2                                                  | WT   | HRG    | down    | 1.00                     | NA   | 0.94  | 1.26 | NA    | 0.78   | 0.62      | NP_001017992 | n.d.          | n.d.  |
| 70     | ACTC1      | cardiac muscle alpha actin 1 proprotein                             | WT   | E2     | down    | 1.00                     | 0.78 | 0.61  | 0.60 | 0.47  | 0.48   | 0.42      | NP_005150    | n.d.          | n.d.  |
| 70     | ACTC1      | cardiac muscle alpha actin 1 proprotein                             | WT   | HRG    | down    | 1.00                     | NA   | 0.94  | 1.26 | NA    | 0.73   | 0.57      | NP_005150    | n.d.          | n.d.  |
| 71     | ACTG1      | actin, gamma 1 propeptide                                           | WT   | E2     | down    | 1.00                     | 0.83 | 0.67  | 0.62 | 0.59  | 0.57   | 0.44      | NP_001605    | n.d.          | n.d.  |
| 71     | ACTG1      | actin, gamma 1 propeptide                                           | TamR | HRG    | down    | 1.00                     | NA   | 0.41  | NA   | NA    | 0.19   | NA        | NP_001605    | n.d.          | n.d.  |
| 83543  | AIF1L      | ionized calcium binding adapter molecule 2 isoform 1                | WT   | HRG    | down    | 1.00                     | NA   | 0.47  | NA   | NA    | 0.36   | NA        | NP_113614    | n.d.          | n.d.  |
| 57184  | C15orf17   | hypothetical protein LOC57184                                       | WT   | E2     | up      | 1.00                     | NA   | 66.50 | NA   | NA    | 14.33  | NA        | NP_065180    | n.d.          | n.d.  |
| 708    | C1QBP      | complement component 1, q subcomponent binding protein precursor    | WT   | E2     | down    | 1.00                     | NA   | NA    | 0.54 | NA    | NA     | 0.74      | NP_001203    | n.d.          | n.d.  |
| 805    | CALM2      | calmodulin 2                                                        | WT   | E2     | down    | 1.00                     | 0.45 | 0.35  | 0.26 | 0.27  | 0.21   | 0.16      | NP_001734    | n.d.          | n.d.  |
| 805    | CALM2      | calmodulin 2                                                        | TamR | HRG    | down    | 1.00                     | NA   | NA    | 1.17 | NA    | NA     | 0.61      | NP_001734    | n.d.          | n.d.  |
| 4076   | CAPRN1     | membrane component chromosome 11 surface marker 1 isoform 2         | WT   | HRG    | down    | 1.00                     | NA   | 0.33  | NA   | NA    | 0.30   | NA        | NP_976240    | n.d.          | n.d.  |
| 1213   | CLTC       | clathrin heavy chain 1                                              | WT   | E2     | down    | 1.00                     | 1.19 | 1.39  | 1.18 | 0.41  | 0.38   | 0.69      | NP_004850    | n.d.          | n.d.  |
| 1213   | CLTC       | clathrin heavy chain 1                                              | WT   | HRG    | down    | 1.00                     | NA   | 1.25  | NA   | NA    | 0.51   | NA        | NP_004850    | n.d.          | n.d.  |
| 9879   | DDX46      | DEAD (Asp-Glu-Ala-Asp) box polypeptide 46                           | WT   | HRG    | up      | 1.00                     | NA   | 0.96  | NA   | NA    | 12.66  | NA        | NP_055644    | n.d.          | n.d.  |
| 1665   | DHX15      | DEAH (Asp-Glu-Ala-His) box polypeptide 15                           | WT   | E2     | up      | 1.00                     | NA   | NA    | 2.51 | NA    | NA     | 3.24      | NP_001349    | n.d.          | n.d.  |
| 1665   | DHX15      | DEAH (Asp-Glu-Ala-His) box polypeptide 15                           | WT   | HRG    | up      | 1.00                     | NA   | 1.37  | NA   | NA    | 2.08   | NA        | NP_001349    | n.d.          | n.d.  |
| 1660   | DHX9       | DEAH (Asp-Glu-Ala-His) box polypeptide 9                            | WT   | E2     | down    | 1.00                     | NA   | 0.64  | 0.58 | NA    | 0.62   | 0.66      | NP_001348    | n.d.          | n.d.  |
| 1660   | DHX9       | DEAH (Asp-Glu-Ala-His) box polypeptide 9                            | WT   | HRG    | down    | 1.00                     | NA   | 0.83  | 0.56 | NA    | 1.03   | 0.62      | NP_001348    | n.d.          | n.d.  |
| 1915   | EEF1A1     | eukaryotic translation elongation factor 1 alpha 1                  | WT   | HRG    | up      | 1.00                     | NA   | 1.83  | NA   | NA    | 2.42   | NA        | NP_001393    | n.d.          | n.d.  |
| 79180  | EFHD2      | EF-hand domain family, member D2                                    | WT   | E2     | down    | 1.00                     | NA   | NA    | 0.11 | NA    | NA     | 0.27      | NP_077305    | n.d.          | n.d.  |
| 79180  | EFHD2      | EF-hand domain family, member D2                                    | WT   | HRG    | down    | 1.00                     | NA   | 0.45  | NA   | NA    | 0.70   | NA        | NP_077305    | n.d.          | n.d.  |
| 1994   | ELAVL1     | ELAV-like 1                                                         | WT   | HRG    | up      | 1.00                     | NA   | 2.63  | NA   | NA    | 0.76   | NA        | NP_001410    | n.d.          | n.d.  |
| 83481  | EPPK1      | epiplakin 1                                                         | WT   | E2     | up      | 1.00                     | NA   | 2.10  | 1.42 | NA    | 0.78   | 0.72      | NP_112598    | n.d.          | n.d.  |
| 2065   | ERBB3      | erbB-3 isoform 1 precursor                                          | WT   | HRG    | up      | 1.00                     | 3.64 | NA    | 2.07 | 4.49  | NA     | 2.01      | NP_001973    | n.d.          | n.d.  |
| 2065   | ERBB3      | erbB-3 isoform 1 precursor                                          | TamR | HRG    | up      | 1.00                     | 8.88 | NA    | 5.67 | 6.77  | NA     | 4.33      | NP_001973    | n.d.          | n.d.  |
| 2314   | FLII       | flightless I homolog                                                | WT   | E2     | down    | 1.00                     | NA   | NA    | 0.72 | NA    | NA     | 0.56      | NP_002009    | n.d.          | n.d.  |
| 28964  | GIT1       | G protein-coupled receptor kinase interactor 1 isoform 2            | TamR | E2     | down    | 1.00                     | 0.62 | NA    | 0.72 | 0.40  | NA     | 0.75      | NP_054749    | n.d.          | n.d.  |
| 2934   | GSN        | gelsolin isoform a precursor                                        | WT   | E2     | down    | 1.00                     | NA   | 0.44  | NA   | NA    | 0.43   | NA        | NP_000168    | n.d.          | n.d.  |
| 2934   | GSN        | gelsolin isoform a precursor                                        | WT   | HRG    | up,down | 1.00                     | NA   | 1.92  | NA   | NA    | 0.66   | NA        | NP_000168    | n.d.          | n.d.  |
| 3005   | H1F0       | H1 histone family, member 0                                         | WT   | HRG    | up      | 1.00                     | NA   | 2.14  | NA   | NA    | 1.15   | NA        | NP_005309    | n.d.          | n.d.  |
| 8971   | H1FX       | H1 histone family, member X                                         | WT   | E2     | down    | 1.00                     | NA   | 0.66  | NA   | NA    | 1.18   | NA        | NP_006017    | n.d.          | n.d.  |
| 8971   | H1FX       | H1 histone family, member X                                         | TamR | E2     | down    | 1.00                     | NA   | 0.47  | NA   | NA    | 0.28   | NA        | NP_006017    | n.d.          | n.d.  |
| 3014   | H2AFX      | H2A histone family, member X                                        | WT   | E2     | down    | 1.00                     | NA   | 0.67  | 0.43 | NA    | 0.68   | 0.54      | NP_002096    | n.d.          | n.d.  |
| 3014   | H2AFX      | H2A histone family, member X                                        | WT   | HRG    | down    | 1.00                     | NA   | 0.49  | NA   | NA    | 0.59   | NA        | NP_002096    | n.d.          | n.d.  |
| 3015   | H2AFZ      | H2A histone family, member Z                                        | WT   | E2     | down    | 1.00                     | NA   | NA    | 0.43 | NA    | NA     | 0.54      | NP_002097    | n.d.          | n.d.  |
| 3007   | HIST1H1D   | histone cluster 1, H1d                                              | WT   | HRG    | up      | 1.00                     | NA   | 1.29  | NA   | NA    | 114.80 | NA        | NP_005311    | n.d.          | n.d.  |
| 8329   | HIST1H2AI  | histone cluster 1, H2ai                                             | WT   | HRG    | up,down | 1.00                     | NA   | 0.49  | 6.40 | NA    | 0.59   | 0.74      | NP_003500    | n.d.          | n.d.  |
| 8359   | HIST1H4A   | histone cluster 1, H4a                                              | WT   | HRG    | down    | 1.00                     | NA   | 0.02  | NA   | NA    | 0.03   | NA        | NP_003529    | n.d.          | n.d.  |
| 8337   | HIST2H2AA3 | histone cluster 2, H2aa3                                            | WT   | E2     | down    | 1.00                     | NA   | NA    | 0.42 | NA    | NA     | 0.55      | NP_003507    | n.d.          | n.d.  |
| 220988 | HNRNPA3    | heterogeneous nuclear ribonucleoprotein A3                          | WT   | HRG    | down    | 1.00                     | NA   | 0.76  | NA   | NA    | 0.58   | NA        | NP_919223    | n.d.          | n.d.  |
| 3185   | HNRNPF     | heterogeneous nuclear ribonucleoprotein F                           | WT   | E2     | down    | 1.00                     | NA   | NA    | 0.71 | NA    | NA     | 0.57      | NP_004957    | n.d.          | n.d.  |
| 3187   | HNRNPH1    | heterogeneous nuclear ribonucleoprotein H1                          | WT   | E2     | down    | 1.00                     | NA   | NA    | 0.71 | NA    | NA     | 0.57      | NP_005511    | n.d.          | n.d.  |
| 3190   | HNRNPK     | heterogeneous nuclear ribonucleoprotein K isoform b                 | WT   | HRG    | down    | 1.00                     | NA   | 0.63  | NA   | NA    | 0.70   | NA        | NP_112552    | n.d.          | n.d.  |
| 4670   | HNRNPM     | heterogeneous nuclear ribonucleoprotein M isoform a                 | WT   | E2     | up      | 1.00                     | NA   | 0.86  | 0.75 | NA    | 1.08   | 3.40      | NP_005959    | n.d.          | n.d.  |
| 3192   | HNRNPU     | heterogeneous nuclear ribonucleoprotein U isoform b                 | WT   | E2     | up,down | 1.00                     | NA   | 0.75  | 0.75 | NA    | 3.03   | 0.66      | NP_004492    | n.d.          | n.d.  |
| 3192   | HNRNPU     | heterogeneous nuclear ribonucleoprotein U isoform b                 | WT   | HRG    | up      | 1.00                     | NA   | 0.74  | 4.26 | NA    | 0.98   | 6.39      | NP_004492    | n.d.          | n.d.  |
| 50809  | HP1BP3     | HP1-BP74                                                            | WT   | HRG    | up      | 1.00                     | NA   | 2.18  | NA   | NA    | 7.92   | NA        | NP_057371    | n.d.          | n.d.  |
| 3304   | HSPA1B     | heat shock 70kDa protein 1B                                         | WT   | E2     | down    | 1.00                     | NA   | 0.62  | 0.80 | NA    | 0.78   | 0.86      | NP_005337    | n.d.          | n.d.  |
| 3304   | HSPA1B     | heat shock 70kDa protein 1B                                         | WT   | HRG    | down    | 1.00                     | 0.88 | 0.56  | 0.57 | 0.74  | 0.79   | 0.57      | NP_005337    | n.d.          | n.d.  |
| 3313   | HSPA9      | heat shock 70kDa protein 9 precursor                                | WT   | HRG    | down    | 1.00                     | 0.87 | NA    | 0.50 | 0.72  | NA     | 0.53      | NP_004125    | n.d.          | n.d.  |
| 3315   | HSPB1      | heat shock protein beta-1                                           | WT   | E2     | up,down | 1.00                     | 1.32 | 1.38  | 1.54 | 0.61  | 0.53   | 0.75      | NP_001531    | n.d.          | n.d.  |
| 3608   | ILF2       | interleukin enhancer binding factor 2                               | WT   | E2     | down    | 1.00                     | NA   | NA    | 0.69 | NA    | NA     | 0.54      | NP_004506    | n.d.          | n.d.  |
| 10657  | KHDRBS1    | KH domain containing, RNA binding, signal transduction associated 1 | WT   | HRG    | up      | 1.00                     | NA   | 0.92  | NA   | NA    | 1.77   | NA        | NP_006550    | n.d.          | n.d.  |
| 3848   | KRT1       | keratin 1                                                           | WT   | E2     | down    | 1.00                     | 0.26 | 0.80  | 0.31 | 0.39  | 0.67   | 0.31      | NP_006112    | n.d.          | n.d.  |
| 3848   | KRT1       | keratin 1                                                           | WT   | HRG    | down    | 1.00                     | 0.76 | 0.78  | 0.31 | 0.70  | 1.03   | 0.38      | NP_006112    | n.d.          | n.d.  |
| 3875   | KRT18      | keratin 18                                                          | WT   | E2     | down    | 1.00                     | 0.53 | 0.81  | 0.61 | 0.86  | 0.75   | 0.64      | NP_000215    | n.d.          | n.d.  |
| 3875   | KRT18      | keratin 18                                                          | WT   | HRG    | up,down | 1.00                     | 0.80 | 0.64  | 0.68 | 1.87  | 0.78   | 3.39      | NP_000215    | n.d.          | n.d.  |
| 3875   | KRT18      | keratin 18                                                          | TamR | HRG    | down    | 1.00                     | 0.59 | 0.70  | 0.78 | 0.41  | 0.72   | 0.81      | NP_000215    | n.d.          | n.d.  |
| 3880   | KRT19      | keratin 19                                                          | WT   | E2     | up,down | 1.00                     | 1.63 | 0.72  | 0.67 | 0.68  | 0.76   | 0.64      | NP_002267    | n.d.          | n.d.  |
| 3880   | KRT19      | keratin 19                                                          | TamR | E2     | down    | 1.00                     | NA   | 0.68  | 0.80 | NA    | 0.47   | 0.56      | NP_002267    | n.d.          | n.d.  |
| 3880   | KRT19      | keratin 19                                                          | TamR | HRG    | up      | 1.00                     | 1.05 | 0.71  | 0.84 | 2.31  | 0.68   | 0.85      | NP_002267    | n.d.          | n.d.  |
| 3856   | KRT8       | keratin 8                                                           | WT   | E2     | down    | 1.00                     | 0.47 | 0.78  | 0.61 | 0.69  | 0.82   | 0.63      | NP_002264    | n.d.          | n.d.  |
| 3856   | KRT8       | keratin 8                                                           | TamR | E2     | down    | 1.00                     | 0.67 | 0.77  | 0.85 | 0.44  | 0.38   | 0.92      | NP_002264    | n.d.          | n.d.  |
| 3856   | KRT8       | keratin 8                                                           | TamR | HRG    | down    | 1.00                     | 0.94 | 0.76  | 0.79 | 0.60  | 0.57   | 0.67      | NP_002264    | n.d.          | n.d.  |
| 3857   | KRT9       | keratin 9                                                           | WT   | HRG    | down    | 1.00                     | NA   | NA    | 0.06 | NA    | NA     | 0.09      | NP_000217    | n.d.          | n.d.  |
| 3980   | LIG3       | ligase III, DNA, ATP-dependent isoform alpha precursor              | WT   | E2     | down    | 1.00                     | NA   | 0.70  | 0.63 | NA    | 0.67   | 0.55      | NP_039269    | n.d.          | n.d.  |
| 3980   | LIG3       | ligase III, DNA, ATP-dependent isoform alpha precursor              | WT   | HRG    | up      | 1.00                     | NA   | 1.10  | 0.95 | NA    | 0.83   | 4.59      | NP_039269    | n.d.          | n.d.  |
| 4000   | LMNA       | lamin A/C isoform 2                                                 | WT   | E2     | down    | 1.00                     | 0.63 | 0.83  | 0.74 | 0.42  | 0.63   | 0.63      | NP_005563    | n.d.          | n.d.  |
| 4000   | LMNA       | lamin A/C isoform 2                                                 | WT   | HRG    | up      | 1.00                     | NA   | 1.19  | 1.30 | NA    | 1.14   | 2.35      | NP_005563    | n.d.          | n.d.  |
| 4001   | LMNB1      | lamin B1                                                            | WT   | HRG    | up      | 1.00                     | NA   | 3.04  | NA   | NA    | 3.43   | NA        | NP_005564    | n.d.          | n.d.  |
| 390876 | LOC390876  | PREDICTED: similar to ribosomal protein L35                         | WT   | E2     | down    | 1.00                     | NA   | 0.89  | NA   | NA    | 0.60   | NA        | XP_945041    | n.d.          | n.d.  |
| 5594   | MAPK1      | mitogen-activated protein kinase 1                                  | WT   | HRG    | up      | 1.00                     | 3.01 | 4.73  | 1.64 | 11.44 | 5.58   | 1.18      | NP_620407    | n.d.          | n.d.  |
| 5594   | MAPK1      | mitogen-activated protein kinase 1                                  | TamR | HRG    | up      | 1.00                     | NA   | NA    | 3.86 | NA    | NA     | 1.48      | NP_620407    | n.d.          | n.d.  |
| 1432   | MAPK14     | mitogen-activated protein kinase 14 isoform 1                       | TamR | HRG    | up,down | 1.00                     | 0.91 | NA    | 2.30 | 2.42  | NA     | 0.26      | NP_001306    | n.d.          | n.d.  |
| 5595   | MAPK3      | mitogen-activated protein kinase 3 isoform 1                        | WT   | HRG    | up      | 1.00                     | 2.43 | 2.73  | 3.16 | 12.23 | 3.29   | 2.12      | NP_002737    | n.d.          | n.d.  |
| 5595   | MAPK3      | mitogen-activated protein kinase 3 isoform 2                        | TamR | HRG    | up      | 1.00                     | 2.39 | NA    | 3.18 | 1.81  | NA     | 3.09      | NP_001035145 | n.d.          | n.d.  |
| 5598   | MAPK7      | mitogen-activated protein kinase 7 isoform 1                        | WT   | HRG    | down    | 1.00                     | 0.63 | NA    | NA   | 1.32  | NA     | NA        | NP_002740    | n.d.          | n.d.  |
| 10627  | MRCL3      | myosin regulatory light chain MRCL3                                 | WT   | E2     | down    | 1.00                     | 0.31 | 0.37  | 0.19 | 0.13  | 0.13   | 0.10      | NP_006462    | n.d.          | n.d.  |

|        |          |                                                                       |      |     |         |      |       |      |       |      |      |       |              |      |      |
|--------|----------|-----------------------------------------------------------------------|------|-----|---------|------|-------|------|-------|------|------|-------|--------------|------|------|
| 4628   | MYH10    | myosin, heavy polypeptide 10, non-muscle                              | WT   | E2  | up,down | 1.00 | 0.24  | 0.13 | 0.37  | 0.87 | 0.05 | 4.20  | NP_005955    | n.d. | n.d. |
| 4628   | MYH10    | myosin, heavy polypeptide 10, non-muscle                              | WT   | HRG | up,down | 1.00 | NA    | 0.61 | NA    | NA   | 6.33 | NA    | NP_005955    | n.d. | n.d. |
| 79784  | MYH14    | myosin, heavy chain 14 isoform 1                                      | WT   | E2  | up,down | 1.00 | 36.71 | 0.51 | 2.37  | 0.29 | 0.22 | 0.26  | NP_001070654 | n.d. | n.d. |
| 79784  | MYH14    | myosin, heavy chain 14 isoform 1                                      | WT   | HRG | up,down | 1.00 | NA    | 4.22 | 0.68  | NA   | 0.49 | 0.62  | NP_001070654 | n.d. | n.d. |
| 79784  | MYH14    | myosin, heavy chain 14 isoform 1                                      | TamR | HRG | down    | 1.00 | NA    | 0.38 | 1.28  | NA   | 0.38 | 1.10  | NP_001070654 | n.d. | n.d. |
| 4627   | MYH9     | myosin, heavy polypeptide 9, non-muscle                               | WT   | E2  | down    | 1.00 | 0.30  | 0.24 | 0.23  | 1.15 | 0.15 | 0.09  | NP_002464    | n.d. | n.d. |
| 4627   | MYH9     | myosin, heavy polypeptide 9, non-muscle                               | WT   | HRG | down    | 1.00 | NA    | 0.80 | 0.44  | NA   | 0.78 | 0.77  | NP_002464    | n.d. | n.d. |
| 4637   | MYL6     | myosin, light chain 6, alkali, smooth muscle and non-muscle isoform 1 | WT   | E2  | up,down | 1.00 | 0.27  | 0.29 | 1.64  | 0.13 | 0.14 | 0.30  | NP_066299    | n.d. | n.d. |
| 4637   | MYL6     | myosin, light chain 6, alkali, smooth muscle and non-muscle isoform 1 | WT   | HRG | down    | 1.00 | NA    | 0.59 | 0.67  | NA   | 0.48 | 0.71  | NP_066299    | n.d. | n.d. |
| 4641   | MYO1C    | myosin IC isoform c                                                   | WT   | E2  | down    | 1.00 | 0.31  | 0.22 | 0.22  | 0.20 | 0.25 | 0.60  | NP_203693    | n.d. | n.d. |
| 4691   | NCL      | nucleolin                                                             | WT   | E2  | down    | 1.00 | 0.62  | 0.59 | 0.79  | 0.29 | 0.52 | 1.20  | NP_005372    | n.d. | n.d. |
| 4691   | NCL      | nucleolin                                                             | WT   | HRG | down    | 1.00 | NA    | 0.58 | 0.96  | NA   | 0.55 | 0.82  | NP_005372    | n.d. | n.d. |
| 4841   | NONO     | non-POU domain containing, octamer-binding                            | WT   | E2  | down    | 1.00 | NA    | NA   | 0.72  | NA   | NA   | 0.65  | NP_031389    | n.d. | n.d. |
| 4841   | NONO     | non-POU domain containing, octamer-binding                            | TamR | E2  | down    | 1.00 | NA    | 0.62 | NA    | NA   | 0.37 | NA    | NP_031389    | n.d. | n.d. |
| 4869   | NPM1     | nucleophosmin 1 isoform 1                                             | WT   | E2  | down    | 1.00 | 0.37  | 0.50 | 0.52  | 0.32 | 0.46 | 0.51  | NP_002511    | n.d. | n.d. |
| 4869   | NPM1     | nucleophosmin 1 isoform 1                                             | WT   | HRG | down    | 1.00 | NA    | 0.51 | 0.84  | NA   | 0.53 | 0.74  | NP_002511    | n.d. | n.d. |
| 142    | PARP1    | poly (ADP-ribose) polymerase family, member 1                         | WT   | E2  | down    | 1.00 | NA    | 0.73 | 0.81  | NA   | 0.38 | 1.15  | NP_001609    | n.d. | n.d. |
| 142    | PARP1    | poly (ADP-ribose) polymerase family, member 1                         | WT   | HRG | up      | 1.00 | NA    | 0.98 | NA    | NA   | 2.06 | NA    | NP_001609    | n.d. | n.d. |
| 5290   | PIK3CA   | phosphoinositide-3-kinase, catalytic, alpha polypeptide               | TamR | HRG | up      | 1.00 | NA    | NA   | 1.79  | NA   | NA   | 1.32  | NP_006209    | n.d. | n.d. |
| 5291   | PIK3CB   | phosphoinositide-3-kinase, catalytic, beta polypeptide                | TamR | HRG | up      | 1.00 | 2.95  | NA   | 1.81  | 2.70 | NA   | 2.72  | NP_006210    | n.d. | n.d. |
| 5295   | PIK3R1   | phosphoinositide-3-kinase, regulatory subunit 1 (alpha) isoform 1     | WT   | HRG | down    | 1.00 | NA    | 1.14 | 0.64  | NA   | 1.21 | 1.35  | NP_852664    | n.d. | n.d. |
| 5295   | PIK3R1   | phosphoinositide-3-kinase, regulatory subunit 1 (alpha) isoform 1     | TamR | HRG | up      | 1.00 | 1.78  | NA   | 1.37  | 1.48 | NA   | 1.37  | NP_852664    | n.d. | n.d. |
| 5296   | PIK3R2   | phosphoinositide-3-kinase, regulatory subunit 2 (beta)                | WT   | HRG | up      | 1.00 | 1.57  | 3.83 | 2.47  | 1.51 | 2.38 | 2.19  | NP_005018    | n.d. | n.d. |
| 5296   | PIK3R2   | phosphoinositide-3-kinase, regulatory subunit 2 (beta)                | TamR | HRG | down    | 1.00 | 0.93  | NA   | 1.30  | 0.64 | NA   | 1.10  | NP_005018    | n.d. | n.d. |
| 5339   | PLEC1    | plectin 1 isoform 2                                                   | WT   | HRG | down    | 1.00 | NA    | 0.42 | NA    | NA   | 1.32 | NA    | NP_958780    | n.d. | n.d. |
| 445582 | POTEE    | protein expressed in prostate, ovary, testis, and placenta 2          | WT   | E2  | down    | 1.00 | 0.80  | 0.60 | 0.57  | 0.47 | 0.45 | 0.40  | NP_001077007 | n.d. | n.d. |
| 445582 | POTEE    | protein expressed in prostate, ovary, testis, and placenta 2          | WT   | HRG | down    | 1.00 | NA    | 0.94 | NA    | NA   | 0.66 | NA    | NP_001077007 | n.d. | n.d. |
| 27339  | PRPF19   | PRP19/PSO4 pre-mRNA processing factor 19 homolog                      | WT   | E2  | down    | 1.00 | NA    | NA   | 0.26  | NA   | NA   | 0.16  | NP_055317    | n.d. | n.d. |
| 5747   | PTK2     | PTK2 protein tyrosine kinase 2 isoform a                              | TamR | HRG | down    | 1.00 | 0.81  | NA   | 0.61  | 0.61 | NA   | 0.61  | NP_722560    | n.d. | n.d. |
| 5829   | PXN      | paxillin isoform 2                                                    | TamR | E2  | down    | 1.00 | NA    | NA   | 0.55  | NA   | NA   | 0.70  | NP_002850    | n.d. | n.d. |
| 29920  | PYCR2    | pyrroline-5-carboxylate reductase family, member 2                    | WT   | E2  | down    | 1.00 | NA    | NA   | 0.01  | NA   | NA   | 0.00  | NP_037460    | n.d. | n.d. |
| 10635  | RAD51AP1 | RAD51 associated protein 1 isoform b                                  | WT   | E2  | down    | 1.00 | NA    | NA   | 0.03  | NA   | NA   | 0.02  | NP_006470    | n.d. | n.d. |
| 27316  | RBMX     | RNA binding motif protein, X-linked                                   | WT   | HRG | down    | 1.00 | NA    | 0.96 | NA    | NA   | 0.49 | NA    | NP_002130    | n.d. | n.d. |
| 5983   | RFC3     | replication factor C 3 isoform 1                                      | TamR | HRG | down    | 1.00 | 0.00  | NA   | NA    | 0.01 | NA   | NA    | NP_002906    | n.d. | n.d. |
| 6134   | RPL10    | ribosomal protein L10                                                 | WT   | E2  | down    | 1.00 | NA    | NA   | 0.72  | NA   | NA   | 0.61  | NP_006004    | n.d. | n.d. |
| 6136   | RPL12    | ribosomal protein L12                                                 | WT   | E2  | down    | 1.00 | NA    | 0.77 | 0.85  | NA   | 0.62 | 0.58  | NP_000967    | n.d. | n.d. |
| 6137   | RPL13    | ribosomal protein L13                                                 | WT   | E2  | down    | 1.00 | NA    | 0.88 | 0.85  | NA   | 0.55 | 0.99  | NP_150254    | n.d. | n.d. |
| 9045   | RPL14    | ribosomal protein L14                                                 | WT   | E2  | down    | 1.00 | NA    | 0.79 | 1.20  | NA   | 0.59 | 0.53  | NP_003964    | n.d. | n.d. |
| 9045   | RPL14    | ribosomal protein L14                                                 | WT   | HRG | down    | 1.00 | NA    | 0.75 | 0.64  | NA   | 0.64 | 1.07  | NP_003964    | n.d. | n.d. |
| 6138   | RPL15    | ribosomal protein L15                                                 | WT   | E2  | down    | 1.00 | NA    | 0.45 | 0.92  | NA   | 0.42 | 0.34  | NP_002939    | n.d. | n.d. |
| 6138   | RPL15    | ribosomal protein L15                                                 | WT   | HRG | down    | 1.00 | NA    | 0.68 | 0.63  | NA   | 0.73 | 0.67  | NP_002939    | n.d. | n.d. |
| 6141   | RPL18    | ribosomal protein L18                                                 | WT   | E2  | down    | 1.00 | NA    | NA   | 0.42  | NA   | NA   | 0.21  | NP_000970    | n.d. | n.d. |
| 6142   | RPL18A   | ribosomal protein L18a                                                | WT   | E2  | down    | 1.00 | NA    | NA   | 0.94  | NA   | NA   | 0.66  | NP_000971    | n.d. | n.d. |
| 6143   | RPL19    | ribosomal protein L19                                                 | WT   | HRG | down    | 1.00 | NA    | 0.11 | NA    | NA   | 0.34 | NA    | NP_000972    | n.d. | n.d. |
| 6146   | RPL22    | ribosomal protein L22 proprotein                                      | WT   | E2  | down    | 1.00 | NA    | 0.88 | NA    | NA   | 0.60 | NA    | NP_000974    | n.d. | n.d. |
| 6152   | RPL24    | ribosomal protein L24                                                 | WT   | E2  | down    | 1.00 | NA    | 0.80 | 0.79  | NA   | 0.53 | 0.50  | NP_000977    | n.d. | n.d. |
| 6155   | RPL27    | ribosomal protein L27                                                 | WT   | E2  | down    | 1.00 | NA    | 0.77 | 0.77  | NA   | 0.56 | 0.48  | NP_000979    | n.d. | n.d. |
| 6157   | RPL27A   | ribosomal protein L27a                                                | WT   | E2  | down    | 1.00 | NA    | 0.84 | 0.77  | NA   | 0.54 | 0.61  | NP_000981    | n.d. | n.d. |
| 6158   | RPL28    | ribosomal protein L28 isoform 2                                       | WT   | HRG | down    | 1.00 | NA    | 0.90 | 0.52  | NA   | 0.93 | 0.67  | NP_000982    | n.d. | n.d. |
| 6156   | RPL30    | ribosomal protein L30                                                 | WT   | HRG | down    | 1.00 | NA    | 0.10 | NA    | NA   | 0.10 | NA    | NP_000980    | n.d. | n.d. |
| 6122   | RPL31    | ribosomal protein L3 isoform a                                        | WT   | HRG | up      | 1.00 | NA    | NA   | 3.37  | NA   | NA   | 1.20  | NP_000958    | n.d. | n.d. |
| 6160   | RPL31    | ribosomal protein L31 isoform 1                                       | WT   | E2  | up,down | 1.00 | 1.84  | 1.27 | 3.97  | 0.35 | 1.27 | 1.31  | NP_000984    | n.d. | n.d. |
| 6165   | RPL35A   | ribosomal protein L35a                                                | WT   | E2  | down    | 1.00 | NA    | 0.84 | 1.07  | NA   | 0.50 | 0.67  | NP_000987    | n.d. | n.d. |
| 25873  | RPL36    | ribosomal protein L36                                                 | WT   | E2  | down    | 1.00 | NA    | NA   | 0.88  | NA   | NA   | 0.49  | NP_056229    | n.d. | n.d. |
| 25873  | RPL36    | ribosomal protein L36                                                 | WT   | HRG | down    | 1.00 | NA    | 0.03 | 0.75  | NA   | 0.03 | 0.93  | NP_056229    | n.d. | n.d. |
| 6124   | RPL4     | ribosomal protein L4                                                  | WT   | E2  | down    | 1.00 | NA    | 0.85 | 0.31  | NA   | 0.54 | 0.18  | NP_000959    | n.d. | n.d. |
| 6124   | RPL4     | ribosomal protein L4                                                  | WT   | HRG | down    | 1.00 | NA    | 0.81 | 0.62  | NA   | 0.74 | 0.83  | NP_000959    | n.d. | n.d. |
| 6128   | RPL6     | ribosomal protein L6                                                  | WT   | E2  | down    | 1.00 | 0.94  | 0.83 | 1.18  | 0.62 | 0.76 | 0.53  | NP_000961    | n.d. | n.d. |
| 6128   | RPL6     | ribosomal protein L6                                                  | WT   | HRG | down    | 1.00 | NA    | 0.65 | 0.42  | NA   | 0.85 | 0.73  | NP_000961    | n.d. | n.d. |
| 6129   | RPL7     | ribosomal protein L7                                                  | WT   | E2  | down    | 1.00 | NA    | 1.16 | 1.01  | NA   | 0.73 | 0.40  | NP_000962    | n.d. | n.d. |
| 6130   | RPL7A    | ribosomal protein L7a                                                 | WT   | E2  | down    | 1.00 | NA    | 0.72 | 0.84  | NA   | 0.62 | 0.49  | NP_000963    | n.d. | n.d. |
| 6130   | RPL7A    | ribosomal protein L7a                                                 | WT   | HRG | down    | 1.00 | NA    | 1.49 | 0.51  | NA   | 0.85 | 0.62  | NP_000963    | n.d. | n.d. |
| 6132   | RPL8     | ribosomal protein L8                                                  | WT   | E2  | up,down | 1.00 | NA    | 0.68 | 1.11  | NA   | 0.62 | 2.26  | NP_000964    | n.d. | n.d. |
| 6132   | RPL8     | ribosomal protein L8                                                  | WT   | HRG | down    | 1.00 | NA    | 0.68 | 0.40  | NA   | 0.96 | 0.49  | NP_000964    | n.d. | n.d. |
| 6175   | RPLP0    | ribosomal protein P0                                                  | WT   | E2  | down    | 1.00 | NA    | NA   | 1.48  | NA   | NA   | 0.50  | NP_000993    | n.d. | n.d. |
| 6175   | RPLP0    | ribosomal protein P0                                                  | WT   | HRG | down    | 1.00 | NA    | 0.92 | 0.52  | NA   | 0.68 | 0.70  | NP_000993    | n.d. | n.d. |
| 6205   | RPS11    | ribosomal protein S11                                                 | WT   | HRG | up      | 1.00 | NA    | NA   | 1.01  | NA   | NA   | 10.41 | NP_001006    | n.d. | n.d. |
| 6207   | RPS13    | ribosomal protein S13                                                 | WT   | E2  | up      | 1.00 | NA    | 1.12 | 10.45 | NA   | 0.72 | 2.62  | NP_001008    | n.d. | n.d. |
| 6207   | RPS13    | ribosomal protein S13                                                 | WT   | HRG | up      | 1.00 | NA    | 5.13 | 1.19  | NA   | 1.17 | 8.06  | NP_001008    | n.d. | n.d. |
| 6208   | RPS14    | ribosomal protein S14                                                 | WT   | E2  | down    | 1.00 | NA    | 0.85 | NA    | NA   | 0.59 | NA    | NP_005608    | n.d. | n.d. |
| 6209   | RPS15    | ribosomal protein S15                                                 | WT   | E2  | up      | 1.00 | NA    | NA   | 0.85  | NA   | NA   | 2.43  | NP_001009    | n.d. | n.d. |
| 6210   | RPS15A   | ribosomal protein S15a                                                | WT   | E2  | up,down | 1.00 | 0.80  | 0.88 | 0.84  | 1.06 | 0.63 | 1.60  | NP_001010    | n.d. | n.d. |
| 6222   | RPS18    | ribosomal protein S18                                                 | WT   | HRG | down    | 1.00 | NA    | NA   | 0.01  | NA   | NA   | 0.01  | NP_072045    | n.d. | n.d. |
| 6229   | RPS24    | ribosomal protein S24 isoform c                                       | WT   | E2  | down    | 1.00 | 0.76  | 0.74 | 0.86  | 0.52 | 0.52 | 0.56  | NP_001017    | n.d. | n.d. |
| 6230   | RPS25    | ribosomal protein S25                                                 | WT   | E2  | down    | 1.00 | NA    | 0.64 | 0.92  | NA   | 0.47 | 0.44  | NP_001019    | n.d. | n.d. |
| 6230   | RPS25    | ribosomal protein S25                                                 | WT   | HRG | down    | 1.00 | NA    | 0.55 | NA    | NA   | 0.53 | NA    | NP_001019    | n.d. | n.d. |
| 6231   | RPS26    | ribosomal protein S26                                                 | WT   | E2  | down    | 1.00 | NA    | NA   | 0.66  | NA   | NA   | 1.49  | NP_001020    | n.d. | n.d. |
| 6231   | RPS26    | ribosomal protein S26                                                 | WT   | HRG | up      | 1.00 | NA    | 0.83 | NA    | NA   | 4.87 | NA    | NP_001020    | n.d. | n.d. |
| 6189   | RPS3A    | ribosomal protein S3a                                                 | WT   | E2  | down    | 1.00 | NA    | 1.04 | 0.83  | NA   | 0.68 | 0.52  | NP_000997    | n.d. | n.d. |
| 6189   | RPS3A    | ribosomal protein S3a                                                 | WT   | HRG | up      | 1.00 | NA    | 1.66 | 0.81  | NA   | 0.81 | 0.67  | NP_000997    | n.d. | n.d. |
| 6191   | RPS4X    | ribosomal protein S4, X-linked X isoform                              | WT   | E2  | down    | 1.00 | NA    | 0.80 | 0.71  | NA   | 0.73 | 0.55  | NP_000998    | n.d. | n.d. |
| 6191   | RPS4X    | ribosomal protein S4, X-linked X isoform                              | WT   | HRG | down    | 1.00 | NA    | 0.84 | 0.99  | NA   | 0.65 | 0.87  | NP_000998    | n.d. | n.d. |
| 6201   | RPS7     | ribosomal protein S7                                                  | WT   | HRG | up      | 1.00 | NA    | 1.46 | NA    | NA   | 1.64 | NA    | NP_001002    | n.d. | n.d. |
| 6202   | RPS8     | ribosomal protein S8                                                  | WT   | E2  | down    | 1.00 | NA    | NA   | 0.81  | NA   | NA   | 0.65  | NP_001003    | n.d. | n.d. |
| 6203   | RPS9     | ribosomal protein S9                                                  | WT   | E2  | down    | 1.00 | NA    | 0.75 | 0.81  | NA   | 0.58 | 0.59  | NP_001004    | n.d. | n.d. |

|        |           |                                                                                          |      |     |         |      |      |       |       |       |      |      |              |      |      |
|--------|-----------|------------------------------------------------------------------------------------------|------|-----|---------|------|------|-------|-------|-------|------|------|--------------|------|------|
| 6203   | RPS9      | ribosomal protein S9                                                                     | WT   | HRG | up      | 1.00 | NA   | 3.57  | NA    | NA    | 0.90 | NA   | NP_001004    | n.d. | n.d. |
| 26156  | RSL1D1    | ribosomal L1 domain containing 1                                                         | WT   | E2  | up      | 1.00 | NA   | NA    | 0.95  | NA    | NA   | 1.56 | NP_056474    | n.d. | n.d. |
| 6421   | SFPQ      | splicing factor proline/glutamine rich (polypyrimidine tract binding protein associated) | WT   | E2  | down    | 1.00 | NA   | 0.56  | 0.67  | NA    | 0.50 | 0.95 | NP_005057    | n.d. | n.d. |
| 6421   | SFPQ      | splicing factor proline/glutamine rich (polypyrimidine tract binding protein associated) | TamR | E2  | down    | 1.00 | NA   | 0.82  | NA    | NA    | 0.55 | NA   | NP_005057    | n.d. | n.d. |
| 6426   | SFRS1     | splicing factor, arginine/serine-rich 1 isoform 1                                        | WT   | HRG | down    | 1.00 | NA   | 0.55  | NA    | NA    | 0.51 | NA   | NP_008855    | n.d. | n.d. |
| 6427   | SFRS2     | splicing factor, arginine/serine-rich 2                                                  | WT   | E2  | down    | 1.00 | NA   | 0.67  | 0.10  | NA    | 0.63 | 0.10 | NP_003007    | n.d. | n.d. |
| 6427   | SFRS2     | splicing factor, arginine/serine-rich 2                                                  | WT   | HRG | down    | 1.00 | NA   | 0.96  | 0.81  | NA    | 0.61 | 0.84 | NP_003007    | n.d. | n.d. |
| 10929  | SFRS2B    | splicing factor, arginine/serine-rich 2B                                                 | WT   | E2  | down    | 1.00 | NA   | 0.67  | NA    | NA    | 0.63 | NA   | NP_115285    | n.d. | n.d. |
| 6428   | SFRS3     | splicing factor, arginine/serine-rich 3                                                  | WT   | E2  | up,down | 1.00 | NA   | NA    | 36.48 | NA    | NA   | 0.55 | NP_003008    | n.d. | n.d. |
| 6431   | SFRS6     | arginine/serine-rich splicing factor 6                                                   | WT   | E2  | down    | 1.00 | NA   | 0.74  | NA    | NA    | 0.57 | NA   | NP_006266    | n.d. | n.d. |
| 6464   | SHC1      | SHC (Src homology 2 domain containing) transforming protein 1 isoform 1                  | WT   | HRG | up      | 1.00 | 1.05 | NA    | 1.39  | 1.67  | NA   | 1.91 | NP_892113    | n.d. | n.d. |
| 11198  | SUPT16H   | chromatin-specific transcription elongation factor large subunit                         | WT   | HRG | down    | 1.00 | NA   | 0.31  | NA    | NA    | 0.59 | NA   | NP_009123    | n.d. | n.d. |
| 10189  | THOC4     | THO complex 4                                                                            | WT   | E2  | down    | 1.00 | NA   | 0.86  | 0.85  | NA    | 0.62 | 0.59 | NP_005773    | n.d. | n.d. |
| 7082   | TJP1      | tight junction protein 1 isoform b                                                       | WT   | E2  | down    | 1.00 | NA   | NA    | 0.17  | NA    | NA   | 0.27 | NP_783297    | n.d. | n.d. |
| 7082   | TJP1      | tight junction protein 1 isoform b                                                       | WT   | HRG | down    | 1.00 | NA   | 0.46  | NA    | NA    | 0.71 | NA   | NP_783297    | n.d. | n.d. |
| 9414   | TJP2      | tight junction protein 2 (zona occludens 2) isoform 1                                    | WT   | HRG | down    | 1.00 | NA   | 0.13  | NA    | NA    | 0.16 | NA   | NP_004808    | n.d. | n.d. |
| 7150   | TOP1      | DNA topoisomerase I                                                                      | WT   | E2  | down    | 1.00 | NA   | 0.78  | 0.06  | NA    | 0.71 | 0.08 | NP_003277    | n.d. | n.d. |
| 7150   | TOP1      | DNA topoisomerase I                                                                      | WT   | HRG | down    | 1.00 | NA   | 0.97  | 0.51  | NA    | 0.81 | 0.59 | NP_003277    | n.d. | n.d. |
| 7168   | TPM1      | tropomyosin 1 alpha chain isoform 4                                                      | WT   | E2  | down    | 1.00 | 0.49 | 0.91  | 0.54  | 0.22  | 0.33 | 1.17 | NP_001018006 | n.d. | n.d. |
| 7168   | TPM1      | tropomyosin 1 alpha chain isoform 6                                                      | WT   | E2  | down    | 1.00 | NA   | 1.18  | NA    | NA    | 0.62 | NA   | NP_001018008 | n.d. | n.d. |
| 7168   | TPM1      | tropomyosin 1 alpha chain isoform 5                                                      | TamR | E2  | down    | 1.00 | 0.49 | NA    | NA    | 0.31  | NA   | NA   | NP_000357    | n.d. | n.d. |
| 7169   | TPM2      | tropomyosin 2 (beta) isoform 2                                                           | WT   | E2  | up,down | 1.00 | 0.54 | 0.55  | 0.70  | 0.25  | 0.29 | 1.70 | NP_998839    | n.d. | n.d. |
| 7170   | TPM3      | tropomyosin 3 isoform 1                                                                  | WT   | E2  | up,down | 1.00 | 0.49 | NA    | 0.72  | 0.26  | NA   | 2.74 | NP_689476    | n.d. | n.d. |
| 7170   | TPM3      | tropomyosin 3 isoform 2                                                                  | WT   | E2  | up,down | 1.00 | 0.57 | 0.73  | 0.77  | 0.29  | 0.50 | 3.34 | NP_705935    | n.d. | n.d. |
| 7171   | TPM4      | tropomyosin 4 isoform 2                                                                  | WT   | E2  | up,down | 1.00 | 0.57 | 0.67  | 0.90  | 0.29  | 0.50 | 2.74 | NP_003281    | n.d. | n.d. |
| 6737   | TRIM21    | tripartite motif protein 21                                                              | WT   | E2  | up      | 1.00 | 5.54 | 11.18 | 11.12 | 0.95  | 0.69 | 0.72 | NP_003132    | n.d. | n.d. |
| 6737   | TRIM21    | tripartite motif protein 21                                                              | WT   | HRG | up      | 1.00 | 2.66 | 3.12  | 3.26  | 1.54  | 1.88 | 1.74 | NP_003132    | n.d. | n.d. |
| 7251   | TSG101    | tumor susceptibility gene 101                                                            | WT   | HRG | up      | 1.00 | 1.18 | NA    | 1.20  | 45.75 | NA   | 7.39 | NP_006283    | n.d. | n.d. |
| 7846   | TUBA1A    | tubulin, alpha 1a                                                                        | WT   | E2  | down    | 1.00 | NA   | NA    | 0.84  | NA    | NA   | 0.59 | NP_006000    | n.d. | n.d. |
| 10376  | TUBA1B    | tubulin, alpha, ubiquitous                                                               | WT   | E2  | down    | 1.00 | 0.87 | 1.26  | 0.92  | 0.48  | 0.56 | 0.53 | NP_006073    | n.d. | n.d. |
| 203068 | TUBB      | tubulin, beta                                                                            | WT   | E2  | down    | 1.00 | NA   | 1.08  | 0.84  | NA    | 0.65 | 0.55 | NP_821133    | n.d. | n.d. |
| 10383  | TUBB2C    | tubulin, beta_2                                                                          | WT   | E2  | down    | 1.00 | NA   | 1.08  | 0.84  | NA    | 0.65 | 0.55 | NP_006079    | n.d. | n.d. |
| 7520   | XRCC5     | ATP-dependent DNA helicase II                                                            | WT   | E2  | up,down | 1.00 | 0.42 | 0.42  | 0.77  | 1.01  | 0.85 | 4.79 | NP_066964    | n.d. | n.d. |
| 7520   | XRCC5     | ATP-dependent DNA helicase II                                                            | WT   | HRG | down    | 1.00 | NA   | 0.50  | NA    | NA    | 0.92 | NA   | NP_066964    | n.d. | n.d. |
| 2547   | XRCC6     | ATP-dependent DNA helicase II, 70 kDa subunit                                            | WT   | E2  | up,down | 1.00 | 0.40 | 0.40  | 0.45  | 0.98  | 0.78 | 1.56 | NP_001460    | n.d. | n.d. |
| 2547   | XRCC6     | ATP-dependent DNA helicase II, 70 kDa subunit                                            | WT   | HRG | down    | 1.00 | NA   | 0.41  | NA    | NA    | 0.63 | NA   | NP_001460    | n.d. | n.d. |
| 7533   | YWHAH     | tyrosine 3-monooxygenase/tryptophan 5-monooxygenase activation protein, eta polypeptide  | WT   | E2  | up,down | 1.00 | NA   | NA    | 1.58  | NA    | NA   | 0.42 | NP_003396    | n.d. | n.d. |
| 7534   | YWHAZ     | tyrosine 3/tryptophan 5-monooxygenase activation protein, zeta polypeptide               | WT   | E2  | down    | 1.00 | NA   | 1.40  | NA    | NA    | 0.35 | NA   | NP_003397    | n.d. | n.d. |
| 389435 | HCG_21078 | ribosomal protein L27a-like                                                              | WT   | HRG | up      | 1.00 | NA   | 4.09  | NA    | NA    | 0.73 | NA   | NP_001083056 | n.d. | n.d. |

**B : Proteins with altered serine/threonine/tyrosine phosphorylation**

| GeneID | Symbol  | Name                                                      | Cell | Ligand | change  | fold change (vs control) |      |      |      |       |       | Accession | Sequence     | Modifications                          |       |
|--------|---------|-----------------------------------------------------------|------|--------|---------|--------------------------|------|------|------|-------|-------|-----------|--------------|----------------------------------------|-------|
|        |         |                                                           |      |        |         | 0min                     | 1min | 2min | 5min | 10min | 30min |           |              |                                        | 60min |
| 23461  | ABCA5   | ATP-binding cassette, sub-family A, member 5              | TamR | E2     | down    | 1.00                     | NA   | NA   | 0.74 | NA    | NA    | 0.03      | NP_061142    | KANRVTVFSTHFMDADLADR                   | 1     |
| 23     | ABCF1   | ATP-binding cassette, sub-family F, member 1 isoform b    | WT   | E2     | down    | 1.00                     | NA   | 0.45 | 0.45 | NA    | 0.28  | 0.25      | NP_001081    | KLVSPTSDEEDEVPAKPR                     | 2     |
| 23     | ABCF1   | ATP-binding cassette, sub-family F, member 1 isoform b    | WT   | E2     | down    | 1.00                     | NA   | NA   | 0.48 | NA    | NA    | 0.34      | NP_001081    | LSVPTSDEEDEVPAKPR                      | 2     |
| 23     | ABCF1   | ATP-binding cassette, sub-family F, member 1 isoform b    | WT   | HRG    | down    | 1.00                     | NA   | 0.77 | 0.53 | NA    | 0.56  | 0.33      | NP_001081    | LSVPTSDEEDEVPAKPR                      | 2     |
| 9619   | ABCG1   | ATP-binding cassette, sub-family G member 1 isoform 2     | WT   | E2     | up      | 1.00                     | NA   | NA   | 1.53 | NA    | NA    | 1.16      | NP_058198    | GISGKFNSELVIMGSPGAGKSTLMNLINLAGYRETGMK | 4     |
| 55902  | ACSS2   | acyl-CoA synthetase short-chain family member 2 isoform 1 | WT   | E2     | down    | 1.00                     | NA   | 0.69 | 0.77 | NA    | 0.51  | 0.54      | NP_061147    | SIWSPPEVSR                             | 1     |
| 3267   | AGFG1   | HIV-1 Rev binding protein isoform 2                       | WT   | E2     | down    | 1.00                     | NA   | 0.42 | 0.59 | NA    | 0.44  | 0.45      | NP_004495    | SLLGDSAPTLHLNKGTPSQSPVVG               | 2     |
| 3267   | AGFG1   | HIV-1 Rev binding protein isoform 2                       | WT   | HRG    | down    | 1.00                     | 0.57 | 0.49 | NA   | 0.13  | 0.17  | NA        | NP_004495    | SLLGDSAPTLHLNKGTPSQSPVVG               | 2     |
| 79026  | AHNAK   | AHNAK nucleoprotein isoform 1                             | WT   | HRG    | up      | 1.00                     | NA   | NA   | 0.70 | NA    | NA    | 2.60      | NP_001611    | LPSGSGAASPTGSAVDIR                     | 2     |
| 79026  | AHNAK   | AHNAK nucleoprotein isoform 1                             | TamR | HRG    | up      | 1.00                     | NA   | NA   | 0.92 | NA    | NA    | 2.56      | NP_001611    | LPSGSGAASPTGSAVDIR                     | 2     |
| 84335  | AKT1S1  | AKT1 substrate 1 (proline-rich)                           | WT   | E2     | down    | 1.00                     | NA   | 0.69 | NA   | NA    | 0.43  | NA        | NP_001092103 | AATAARPPAPPPAQQPSPPTSPRPTLAR           | 2     |
| 84335  | AKT1S1  | AKT1 substrate 1 (proline-rich)                           | WT   | HRG    | down    | 1.00                     | 0.76 | 0.87 | 0.88 | 0.46  | 0.60  | 0.52      | NP_001092103 | AATAARPPAPPPAQQPSPPTSPRPTLAR           | 2     |
| 84335  | AKT1S1  | AKT1 substrate 1 (proline-rich)                           | TamR | E2     | down    | 1.00                     | NA   | NA   | 0.83 | NA    | NA    | 0.53      | NP_001092103 | AATAARPPAPPPAQQPSPPTSPRPTLAR           | 2     |
| 369    | ARAF    | v-ras murine sarcoma 3611 viral oncogene homolog          | WT   | HRG    | up      | 1.00                     | NA   | 1.66 | NA   | NA    | 7.19  | NA        | NP_001645    | QHEAPSNRPLNELLTPQGPSPR                 | 2     |
| 51593  | ARS2    | arsenate resistance protein 2 isoform a                   | WT   | E2     | down    | 1.00                     | 0.79 | 0.60 | 0.71 | 0.73  | 0.55  | 0.50      | NP_056992    | HELSPPOKR                              | 1     |
| 51593  | ARS2    | arsenate resistance protein 2 isoform a                   | WT   | HRG    | down    | 1.00                     | NA   | 0.66 | NA   | NA    | 0.56  | NA        | NP_056992    | HELSPPOKR                              | 1     |
| 51593  | ARS2    | arsenate resistance protein 2 isoform a                   | TamR | E2     | down    | 1.00                     | 0.65 | 0.96 | 0.90 | 0.47  | 0.71  | 0.78      | NP_056992    | HELSPPOKR                              | 1     |
| 55870  | ASH1L   | ash1 (absent, small, or homeotic)-like                    | TamR | HRG    | up      | 1.00                     | NA   | 9.21 | NA   | NA    | 1.81  | NA        | NP_060959    | LGTTGTTAGLVSKDLIRKAGVGVAGIHK           | 3     |
| 55102  | ATG2B   | ATG2 autophagy related 2 homolog B                        | WT   | E2     | down    | 1.00                     | NA   | NA   | 0.76 | NA    | NA    | 0.50      | NP_060506    | SYISPHSPSHTPTR                         | 2     |
| 55102  | ATG2B   | ATG2 autophagy related 2 homolog B                        | WT   | HRG    | down    | 1.00                     | 0.79 | NA   | NA   | 0.66  | NA    | NA        | NP_060506    | SYISPHSPSHTPTR                         | 2     |
| 57205  | ATP10D  | ATPase, class V, type 10D                                 | WT   | E2     | up      | 1.00                     | NA   | 1.67 | NA   | NA    | 1.64  | NA        | NP_065186    | AGLIITGR                               | 1     |
| 9531   | BAG3    | BCL2-associated athanogene 3                              | WT   | E2     | down    | 1.00                     | 0.51 | 0.44 | 0.56 | 0.46  | 0.76  | 0.50      | NP_004272    | SSTPLHSPSPIR                           | 2     |
| 9531   | BAG3    | BCL2-associated athanogene 3                              | TamR | E2     | down    | 1.00                     | 0.28 | 0.40 | 0.54 | 0.32  | 0.34  | 0.29      | NP_004272    | SSTPLHSPSPIR                           | 2     |
| 9531   | BAG3    | BCL2-associated athanogene 3                              | TamR | HRG    | up,down | 1.00                     | 0.67 | 0.69 | 1.50 | 0.39  | 0.39  | 2.51      | NP_004272    | SSTPLHSPSPIR                           | 2     |
| 9774   | BCLAF1  | BCL2-associated transcription factor 1 isoform 1          | WT   | E2     | down    | 1.00                     | NA   | 0.54 | NA   | NA    | 0.48  | NA        | NP_055554    | IDISPSLTR                              | 1     |
| 9774   | BCLAF1  | BCL2-associated transcription factor 1 isoform 1          | WT   | E2     | down    | 1.00                     | NA   | 0.60 | 0.75 | NA    | 0.51  | 0.55      | NP_055554    | NTPSQHSHSIQHSR                         | 1     |
| 9774   | BCLAF1  | BCL2-associated transcription factor 1 isoform 1          | WT   | E2     | down    | 1.00                     | NA   | 0.52 | 0.81 | NA    | 0.40  | 0.43      | NP_055554    | SGSGSVGNSSRYSPSQNSPIHHIPSR             | 2     |
| 9774   | BCLAF1  | BCL2-associated transcription factor 1 isoform 1          | WT   | E2     | down    | 1.00                     | 0.80 | 0.50 | 0.65 | 0.71  | 0.36  | 0.41      | NP_055554    | YSPSQNSPIHHIPSR                        | 2     |
| 9774   | BCLAF1  | BCL2-associated transcription factor 1 isoform 1          | WT   | E2     | down    | 1.00                     | NA   | 0.64 | NA   | NA    | 0.51  | NA        | NP_055554    | YSPSQNSPIHHIPSR                        | 2     |
| 9774   | BCLAF1  | BCL2-associated transcription factor 1 isoform 1          | WT   | HRG    | down    | 1.00                     | 0.49 | NA   | NA   | 0.29  | NA    | NA        | NP_055554    | SGSGSVGNSSRYSPSQNSPIHHIPSR             | 2     |
| 9774   | BCLAF1  | BCL2-associated transcription factor 1 isoform 1          | WT   | HRG    | down    | 1.00                     | 0.42 | 1.00 | 0.72 | 0.22  | 0.77  | 0.32      | NP_055554    | YSPSQNSPIHHIPSR                        | 2     |
| 9774   | BCLAF1  | BCL2-associated transcription factor 1 isoform 1          | WT   | HRG    | down    | 1.00                     | 0.32 | NA   | NA   | 0.15  | NA    | NA        | NP_055554    | YSPSQNSPIHHIPSR                        | 2     |
| 9774   | BCLAF1  | BCL2-associated transcription factor 1 isoform 1          | TamR | E2     | down    | 1.00                     | NA   | 0.65 | 1.09 | NA    | 0.33  | 0.99      | NP_055554    | NTPSQHSHSIQHSR                         | 1     |
| 9774   | BCLAF1  | BCL2-associated transcription factor 1 isoform 1          | TamR | E2     | down    | 1.00                     | 0.64 | NA   | 0.84 | 0.34  | NA    | 0.60      | NP_055554    | YSPSQNSPIHHIPSR                        | 2     |
| 9774   | BCLAF1  | BCL2-associated transcription factor 1 isoform 1          | TamR | HRG    | down    | 1.00                     | NA   | NA   | 0.82 | NA    | NA    | 0.39      | NP_055554    | YSPSQNSPIHHIPSR                        | 2     |
| 2186   | BPTF    | bromodomain PHD finger transcription factor isoform 2     | TamR | E2     | down    | 1.00                     | 0.03 | NA   | NA   | 0.04  | NA    | NA        | NP_004450    | SALHSSVPKSTNDR                         | 2     |
| 64207  | C14orf4 | chromosome 14 open reading frame 4                        | WT   | E2     | down    | 1.00                     | NA   | 0.44 | NA   | NA    | 0.31  | NA        | NP_078772    | RNSSSPVSPASVPGQR                       | 2     |
| 64207  | C14orf4 | chromosome 14 open reading frame 4                        | WT   | HRG    | down    | 1.00                     | NA   | NA   | 0.53 | NA    | NA    | 0.07      | NP_078772    | RNSSSPVSPASVPGQR                       | 2     |
| 64207  | C14orf4 | chromosome 14 open reading frame 4                        | WT   | HRG    | up      | 1.00                     | NA   | NA   | 2.18 | NA    | NA    | 10.51     | NP_078772    | RNSSSPVSPASVPGQR                       | 3     |
| 64207  | C14orf4 | chromosome 14 open reading frame 4                        | TamR | E2     | down    | 1.00                     | NA   | NA   | 0.80 | NA    | NA    | 0.48      | NP_078772    | RNSSSPVSPASVPGQR                       | 2     |
| 64207  | C14orf4 | chromosome 14 open reading frame 4                        | TamR | HRG    | down    | 1.00                     | NA   | NA   | 0.28 | NA    | NA    | 0.07      | NP_078772    | RNSSSPVSPASVPGQR                       | 2     |
| 64207  | C14orf4 | chromosome 14 open reading frame 4                        | TamR | HRG    | up      | 1.00                     | 0.90 | 1.37 | 3.55 | 3.64  | 0.86  | 0.82      | NP_078772    | RNSSSPVSPASVPGQR                       | 2     |

|        |          |                                                                             |      |     |         |      |      |      |       |       |       |       |              |                                        |   |
|--------|----------|-----------------------------------------------------------------------------|------|-----|---------|------|------|------|-------|-------|-------|-------|--------------|----------------------------------------|---|
| 64207  | C14orf4  | chromosome 14 open reading frame 4                                          | TamR | HRG | up      | 1.00 | NA   | NA   | 5.41  | NA    | NA    | 13.25 | NP_078772    | RNSSSPVPASVPGQR                        | 3 |
| 79169  | C1orf35  | hypothetical protein LOC79169                                               | WT   | E2  | down    | 1.00 | 0.70 | NA   | 0.59  | 0.64  | NA    | 0.33  | NP_077295    | RPAEATSPTSPPERP                        | 2 |
| 55684  | C9orf86  | Rab-like GTP-binding protein 1                                              | WT   | E2  | down    | 1.00 | NA   | NA   | 0.73  | NA    | NA    | 0.50  | NP_078994    | RADDFVRDDPSDVTDEDEGPAEPPPPK            | 2 |
| 8030   | CCDC6    | coiled-coil domain containing 6                                             | WT   | E2  | up,down | 1.00 | 1.78 | NA   | NA    | 0.32  | NA    | NA    | NP_005427    | LQPVSAAPPSPR                           | 2 |
| 8030   | CCDC6    | coiled-coil domain containing 6                                             | WT   | HRG | up      | 1.00 | NA   | 2.40 | 9.06  | NA    | 2.07  | 3.69  | NP_005427    | LQPVSAAPPSPR                           | 2 |
| 8030   | CCDC6    | coiled-coil domain containing 6                                             | TamR | HRG | up      | 1.00 | NA   | NA   | 2.22  | NA    | NA    | 3.95  | NP_005427    | LQPVSAAPPSPR                           | 2 |
| 8621   | CDC2L5   | cell division cycle 2-like 5 isoform 2                                      | WT   | E2  | down    | 1.00 | NA   | NA   | 0.53  | NA    | NA    | 0.31  | NP_112557    | IELTPEDRRP                             | 1 |
| 9578   | CDC42BPB | CDC42-binding protein kinase beta                                           | WT   | E2  | down    | 1.00 | NA   | 0.79 | 0.79  | NA    | 0.58  | 0.56  | NP_006026    | HSTPSNSNSGPPSPNSPHR                    | 2 |
| 9578   | CDC42BPB | CDC42-binding protein kinase beta                                           | WT   | HRG | up      | 1.00 | 0.76 | 0.76 | 1.07  | 0.87  | 2.36  | 2.69  | NP_006026    | HSTPSNSNSGPPSPNSPHR                    | 2 |
| 9578   | CDC42BPB | CDC42-binding protein kinase beta                                           | TamR | HRG | up      | 1.00 | 1.03 | NA   | NA    | 2.36  | NA    | NA    | NP_006026    | HSTPSNSNSGPPSPNSPHR                    | 2 |
| 9620   | CELSR1   | cadherin EGF LAG seven-pass G-type receptor 1                               | WT   | E2  | up      | 1.00 | NA   | NA   | 13.07 | NA    | NA    | 2.04  | NP_055061    | GVLGGRRKHLHEDSATRATLLTR                | 1 |
| 10523  | CHERP    | calcium homeostasis endoplasmic reticulum protein                           | TamR | HRG | down    | 1.00 | NA   | NA   | 0.57  | NA    | NA    | 0.33  | NP_006378    | SRSPPTPPSAGLGSNSAPPDPDR                | 3 |
| 1500   | CTNND1   | catenin, delta 1 isoform 1B                                                 | WT   | E2  | down    | 1.00 | 0.78 | 0.48 | 0.59  | 0.77  | 0.38  | 0.41  | NP_001322    | GSLSLDSLRK                             | 2 |
| 1500   | CTNND1   | catenin, delta 1 isoform 1B                                                 | WT   | HRG | down    | 1.00 | NA   | NA   | 0.52  | NA    | NA    | 0.32  | NP_001322    | GSLSLDSLRK                             | 2 |
| 1500   | CTNND1   | catenin, delta 1 isoform 1B                                                 | WT   | HRG | down    | 1.00 | NA   | 0.47 | 0.86  | NA    | 0.42  | 0.54  | NP_001322    | GSLSLDSLRK                             | 2 |
| 1500   | CTNND1   | catenin, delta 1 isoform 1B                                                 | TamR | E2  | down    | 1.00 | NA   | 0.60 | 0.53  | NA    | 0.43  | 0.55  | NP_001322    | GSLSLDSLRK                             | 2 |
| 2017   | CTTN     | cortactin isoform a                                                         | WT   | E2  | down    | 1.00 | NA   | NA   | 0.76  | NA    | NA    | 0.39  | NP_005222    | AKTQTPPVSPAPQTEER                      | 2 |
| 2017   | CTTN     | cortactin isoform a                                                         | WT   | HRG | up      | 1.00 | NA   | NA   | 3.92  | NA    | NA    | 15.43 | NP_005222    | TQTPPVSPAPQTEER                        | 2 |
| 2017   | CTTN     | cortactin isoform a                                                         | TamR | HRG | up      | 1.00 | NA   | 1.67 | 5.52  | NA    | 15.80 | 6.41  | NP_005222    | TQTPPVSPAPQTEER                        | 2 |
| 1627   | DBN1     | drebrin 1 isoform b                                                         | TamR | E2  | down    | 1.00 | 0.72 | NA   | 0.92  | 0.48  | NA    | 0.74  | NP_543157    | LSSPVLHR                               | 1 |
| 28988  | DBNL     | drebrin-like isoform a                                                      | TamR | E2  | up      | 1.00 | NA   | NA   | 3.17  | NA    | NA    | 2.47  | NP_054782    | QLTOPETHFGR                            | 1 |
| 11325  | DDX42    | DEAD box polypeptide 42 protein                                             | WT   | E2  | down    | 1.00 | NA   | 0.57 | 0.66  | NA    | 0.56  | 0.59  | NP_031398    | QQFHSKPVDSDDDDLEAFMAEVEDQAAR           | 2 |
| 1736   | DKC1     | dyskerin isoform 1                                                          | WT   | E2  | up,down | 1.00 | NA   | 9.53 | 0.58  | NA    | 3.18  | 0.35  | NP_001354    | KRESESEDETTPAAPOLIK                    | 2 |
| 1736   | DKC1     | dyskerin isoform 1                                                          | WT   | E2  | up,down | 1.00 | NA   | NA   | 1.57  | NA    | NA    | 0.49  | NP_001354    | KRESESEDETTPAAPOLIK                    | 2 |
| 1736   | DKC1     | dyskerin isoform 1                                                          | TamR | E2  | up,down | 1.00 | 0.71 | NA   | 3.23  | 0.34  | NA    | 1.07  | NP_001354    | KRESESEDETTPAAPOLIK                    | 2 |
| 1832   | DSP      | desmoplakin isoform II                                                      | WT   | E2  | down    | 1.00 | 0.81 | 0.60 | 0.67  | 1.24  | 0.58  | 0.51  | NP_001008844 | GLPSYNNMSSAPGSR                        | 2 |
| 1838   | DTNB     | dystrobrevin, beta isoform 5                                                | WT   | HRG | down    | 1.00 | NA   | NA   | 0.68  | NA    | NA    | 0.60  | NP_899205    | RLPSTHQISVEQISLLNFMAIAYDSEGR           | 2 |
| 9149   | DYRK1B   | dual-specificity tyrosine-(Y)-phosphorylation regulated kinase 1B isoform a | WT   | E2  | down    | 1.00 | 1.02 | 0.82 | 0.85  | 0.73  | 0.37  | 0.47  | NP_004705    | IYQIQSR                                | 1 |
| 9149   | DYRK1B   | dual-specificity tyrosine-(Y)-phosphorylation regulated kinase 1B isoform a | WT   | HRG | down    | 1.00 | 0.82 | 0.83 | 0.79  | 0.64  | 0.68  | 0.78  | NP_004705    | IYQIQSR                                | 1 |
| 1936   | EEF1D    | eukaryotic translation elongation factor 1 delta isoform 2                  | WT   | E2  | down    | 1.00 | 0.79 | 0.43 | 0.65  | 0.76  | 0.33  | 0.44  | NP_001951    | ATAPQTHVSPMR                           | 1 |
| 1936   | EEF1D    | eukaryotic translation elongation factor 1 delta isoform 2                  | WT   | E2  | down    | 1.00 | NA   | 0.69 | 0.82  | NA    | 0.75  | 0.64  | NP_001951    | KPATPAEDDEDDDILFGSDNEEDKEAAQLR         | 1 |
| 1936   | EEF1D    | eukaryotic translation elongation factor 1 delta isoform 2                  | WT   | HRG | down    | 1.00 | 0.63 | 0.69 | NA    | 0.35  | 0.51  | NA    | NP_001951    | ATAPQTHVSPMR                           | 1 |
| 1936   | EEF1D    | eukaryotic translation elongation factor 1 delta isoform 2                  | TamR | E2  | down    | 1.00 | 0.58 | NA   | 0.66  | 0.44  | NA    | 0.44  | NP_001951    | ATAPQTHVSPMR                           | 1 |
| 1936   | EEF1D    | eukaryotic translation elongation factor 1 delta isoform 2                  | TamR | HRG | down    | 1.00 | NA   | 0.88 | NA    | NA    | 0.53  | NA    | NP_001951    | ATAPQTHVSPMR                           | 1 |
| 1975   | EIF4B    | eukaryotic translation initiation factor 4B                                 | WT   | E2  | down    | 1.00 | NA   | NA   | 0.78  | NA    | NA    | 0.34  | NP_001408    | ERHPSWR                                | 1 |
| 1975   | EIF4B    | eukaryotic translation initiation factor 4B                                 | WT   | HRG | up      | 1.00 | NA   | 1.27 | NA    | NA    | 1.69  | NA    | NP_001408    | ERHPSWR                                | 1 |
| 58513  | EPS15L1  | epidermal growth factor receptor pathway substrate 15-like 1                | WT   | E2  | down    | 1.00 | 0.72 | 0.64 | NA    | 0.70  | 0.51  | NA    | NP_067058    | FHDTSSPLMVTPPSAEAHWAVER                | 1 |
| 51466  | EVL      | Enh/Vasp-like                                                               | WT   | HRG | up      | 1.00 | 1.40 | NA   | NA    | 6.15  | NA    | NA    | NP_057421    | TPSAKSPPEAKSPLOSQPHSR                  | 2 |
| 222584 | FAM83B   | hypothetical protein LOC222584                                              | WT   | E2  | down    | 1.00 | NA   | 0.56 | NA    | NA    | 0.94  | NA    | NP_001010872 | RHSVAGEQPETVYLLLNLR                    | 1 |
| 81608  | FIP1L1   | FIP1 like 1 isoform 1                                                       | WT   | E2  | down    | 1.00 | NA   | NA   | 0.88  | NA    | NA    | 0.44  | NP_112179    | ERDHSPTPVFNSDEERYR                     | 2 |
| 2316   | FLNA     | filamin A, alpha isoform 1                                                  | WT   | E2  | down    | 1.00 | 1.26 | 0.70 | 0.85  | 0.89  | 0.48  | 0.46  | NP_001447    | CSGGLSPGMVR                            | 1 |
| 221937 | FOXX1    | forkhead box K1                                                             | WT   | E2  | down    | 1.00 | 0.70 | 0.60 | 1.05  | 0.48  | 0.42  | 0.60  | NP_001032242 | SAPASPTHGLMSPR                         | 2 |
| 221937 | FOXX1    | forkhead box K1                                                             | WT   | HRG | down    | 1.00 | 0.61 | 0.91 | 0.74  | 0.13  | 0.36  | 0.49  | NP_001032242 | SAPASPTHGLMSPR                         | 2 |
| 221937 | FOXX1    | forkhead box K1                                                             | WT   | HRG | down    | 1.00 | NA   | NA   | 0.60  | NA    | NA    | 0.29  | NP_001032242 | SAPASPTHGLMSPR                         | 3 |
| 221937 | FOXX1    | forkhead box K1                                                             | TamR | E2  | down    | 1.00 | 0.78 | 0.99 | 0.52  | 0.51  | 0.72  | 0.23  | NP_001032242 | SAPASPTHGLMSPR                         | 2 |
| 221937 | FOXX1    | forkhead box K1                                                             | TamR | HRG | down    | 1.00 | 0.83 | 0.61 | 0.52  | 0.39  | 0.08  | 0.22  | NP_001032242 | SAPASPTHGLMSPR                         | 2 |
| 221937 | FOXX1    | forkhead box K1                                                             | TamR | HRG | down    | 1.00 | NA   | NA   | 0.83  | NA    | NA    | 0.36  | NP_001032242 | SAPASPTHGLMSPR                         | 3 |
| 10772  | FUSIP1   | FUS interacting protein (serine-arginine rich) 1 isoform 1                  | WT   | E2  | down    | 1.00 | NA   | 0.45 | NA    | NA    | 0.30  | NA    | NP_006616    | SRSFDYNR                               | 2 |
| 10772  | FUSIP1   | FUS interacting protein (serine-arginine rich) 1 isoform 1                  | WT   | HRG | down    | 1.00 | NA   | 0.62 | 0.66  | NA    | 0.43  | 0.43  | NP_006616    | SRSFDYNR                               | 2 |
| 10772  | FUSIP1   | FUS interacting protein (serine-arginine rich) 1 isoform 1                  | TamR | E2  | down    | 1.00 | 0.50 | 0.88 | 0.75  | 0.32  | 0.72  | 0.58  | NP_006616    | SRSFDYNR                               | 2 |
| 10772  | FUSIP1   | FUS interacting protein (serine-arginine rich) 1 isoform 1                  | TamR | HRG | down    | 1.00 | NA   | 0.11 | 0.90  | NA    | 0.94  | 0.65  | NP_006616    | SRSFDYNR                               | 2 |
| 26130  | GAPVD1   | GTPase activating protein and VPS9 domains 1                                | WT   | E2  | down    | 1.00 | NA   | 0.54 | 0.74  | NA    | 0.47  | 0.48  | NP_056450    | EVSSRFPSTPLGSLVSVGSIATSEDPINKIEDLR     | 2 |
| 8729   | GBF1     | golgi-specific brefeldin A resistant guanine nucleotide exchange factor 1   | WT   | E2  | down    | 1.00 | NA   | 0.70 | 0.91  | NA    | 0.57  | 0.75  | NP_004184    | GYTSDSEVYTDHGRPGK                      | 1 |
| 2932   | GSK3B    | glycogen synthase kinase 3 beta                                             | WT   | E2  | down    | 1.00 | 0.85 | 0.50 | 0.51  | 0.76  | 0.39  | 0.32  | NP_002084    | GEPNVSYICSR                            | 1 |
| 2932   | GSK3B    | glycogen synthase kinase 3 beta                                             | WT   | HRG | down    | 1.00 | NA   | 0.67 | 1.24  | NA    | 0.55  | 0.64  | NP_002084    | GEPNVSYICSR                            | 1 |
| 2932   | GSK3B    | glycogen synthase kinase 3 beta                                             | TamR | E2  | down    | 1.00 | 0.73 | 0.93 | 0.94  | 0.63  | 0.78  | 0.75  | NP_002084    | GEPNVSYICSR                            | 1 |
| 2932   | GSK3B    | glycogen synthase kinase 3 beta                                             | TamR | HRG | up      | 1.00 | NA   | NA   | 2.11  | NA    | NA    | 0.84  | NP_002084    | GEPNVSYICSR                            | 1 |
| 3241   | HPCAL1   | hippocalcin-like 1                                                          | TamR | E2  | up      | 1.00 | NA   | 0.98 | NA    | NA    | 2.52  | NA    | NP_002140    | MVSSVMKMPPEDESTPEKRTDK                 | 4 |
| 3297   | HSF1     | heat shock transcription factor 1                                           | WT   | E2  | down    | 1.00 | NA   | NA   | 0.72  | NA    | NA    | 0.55  | NP_005517    | VKEEPPSPQSPR                           | 2 |
| 3297   | HSF1     | heat shock transcription factor 1                                           | WT   | HRG | down    | 1.00 | NA   | NA   | 0.72  | NA    | NA    | 0.64  | NP_005517    | VKEEPPSPQSPR                           | 2 |
| 3297   | HSF1     | heat shock transcription factor 1                                           | TamR | E2  | down    | 1.00 | 0.58 | NA   | NA    | 0.47  | NA    | NA    | NP_005517    | VKEEPPSPQSPR                           | 2 |
| 3315   | HSPB1    | heat shock protein beta-1                                                   | WT   | E2  | down    | 1.00 | 0.65 | 0.37 | 0.48  | 0.80  | 0.36  | 0.35  | NP_001531    | GPSWDPPFRDWPYHSR                       | 1 |
| 3315   | HSPB1    | heat shock protein beta-1                                                   | WT   | E2  | down    | 1.00 | NA   | 0.65 | 0.85  | NA    | 0.78  | 0.81  | NP_001531    | LPEEWSQWLGGSWPVGYVRLPPAAIESPAVAAPAYS   | 1 |
| 3315   | HSPB1    | heat shock protein beta-1                                                   | WT   | E2  | down    | 1.00 | 0.81 | 0.42 | 0.68  | 0.87  | 0.33  | 0.39  | NP_001531    | QLSSGVSEIR                             | 1 |
| 3315   | HSPB1    | heat shock protein beta-1                                                   | WT   | HRG | up,down | 1.00 | 0.50 | NA   | NA    | 1.74  | NA    | NA    | NP_001531    | GPSWDPPFR                              | 1 |
| 3315   | HSPB1    | heat shock protein beta-1                                                   | WT   | HRG | up,down | 1.00 | 0.49 | 0.48 | NA    | 1.53  | 3.59  | NA    | NP_001531    | GPSWDPPFRDWPYHSR                       | 1 |
| 3315   | HSPB1    | heat shock protein beta-1                                                   | WT   | HRG | up      | 1.00 | NA   | 1.05 | 1.86  | NA    | 14.46 | 17.41 | NP_001531    | LPEEWSQWLGGSWPVGYVRLPPAAIESPAVAAPAYS   | 1 |
| 3315   | HSPB1    | heat shock protein beta-1                                                   | WT   | HRG | up,down | 1.00 | 0.53 | 1.34 | 0.96  | 1.35  | 2.57  | 4.02  | NP_001531    | QLSSGVSEIR                             | 1 |
| 3315   | HSPB1    | heat shock protein beta-1                                                   | TamR | E2  | down    | 1.00 | 0.55 | NA   | 0.51  | 0.35  | NA    | 0.43  | NP_001531    | GPSWDPPFR                              | 1 |
| 3315   | HSPB1    | heat shock protein beta-1                                                   | TamR | E2  | down    | 1.00 | NA   | 0.55 | 0.57  | NA    | 0.38  | 0.54  | NP_001531    | GPSWDPPFRDWPYHSR                       | 1 |
| 3315   | HSPB1    | heat shock protein beta-1                                                   | TamR | E2  | down    | 1.00 | 0.50 | 0.68 | 0.73  | 0.24  | 0.34  | 0.54  | NP_001531    | QLSSGVSEIR                             | 1 |
| 3315   | HSPB1    | heat shock protein beta-1                                                   | TamR | HRG | up      | 1.00 | NA   | NA   | 1.31  | NA    | NA    | 1.72  | NP_001531    | GPSWDPPFR                              | 1 |
| 3315   | HSPB1    | heat shock protein beta-1                                                   | TamR | HRG | up      | 1.00 | NA   | NA   | 1.20  | NA    | NA    | 1.58  | NP_001531    | QLSSGVSEIR                             | 1 |
| 3488   | IGFBP5   | insulin-like growth factor binding protein 5                                | WT   | E2  | down    | 1.00 | NA   | NA   | 0.18  | NA    | NA    | 0.07  | NP_000590    | IERDSREHEEPTTSEMAEETYSRK               | 2 |
| 3488   | IGFBP5   | insulin-like growth factor binding protein 5                                | TamR | E2  | down    | 1.00 | NA   | NA   | 1.08  | NA    | NA    | 0.36  | NP_000590    | IERDSREHEEPTTSEMAEETYSRK               | 2 |
| 3667   | IRS1     | insulin receptor substrate 1                                                | WT   | HRG | up      | 1.00 | NA   | 1.92 | NA    | NA    | 41.45 | NA    | NP_005535    | RHSSETFSSSTPSATR                       | 2 |
| 3667   | IRS1     | insulin receptor substrate 1                                                | WT   | HRG | up      | 1.00 | NA   | NA   | 1.39  | NA    | NA    | 2.77  | NP_005535    | SVTPDSLGHTPPAR                         | 2 |
| 10657  | KHDRBS1  | KH domain containing, RNA binding, signal transduction associated 1         | WT   | HRG | up      | 1.00 | 0.88 | NA   | NA    | 2.97  | NA    | NA    | NP_006550    | SGSMDPSGAHPSVR                         | 1 |
| 10657  | KHDRBS1  | KH domain containing, RNA binding, signal transduction associated 1         | TamR | E2  | down    | 1.00 | 0.73 | NA   | NA    | 0.19  | NA    | NA    | NP_006550    | SGSMDPSGAHPSVR                         | 1 |
| 10657  | KHDRBS1  | KH domain containing, RNA binding, signal transduction associated 1         | TamR | HRG | up      | 1.00 | 1.32 | 1.68 | 6.33  | 14.55 | 9.74  | 3.73  | NP_006550    | SGSMDPSGAHPSVR                         | 1 |
| 80728  | KIAA1688 | KIAA1688 protein                                                            | WT   | E2  | up      | 1.00 | NA   | NA   | 0.67  | NA    | NA    | 6.13  | NP_079527    | KPSGDSQPSSPR                           | 2 |
| 3875   | KRT18    | keratin 18                                                                  | WT   | E2  | up,down | 1.00 | 0.62 | 6.87 | 0.73  | 2.37  | 0.70  | 1.53  | NP_000215    | STFSTNYR                               | 1 |
| 3875   | KRT18    | keratin 18                                                                  | WT   | HRG | up,down | 1.00 | 0.39 | 3.63 | NA    | 1.51  | 1.15  | NA    | NP_000215    | STFSTNYR                               | 1 |
| 3856   | KRT8     | keratin 8                                                                   | WT   | HRG | up      | 1.00 | 1.05 | 1.00 | 1.10  | 3.20  | 3.34  | 2.59  | NP_002264    | TTSGYAGLLSSAYGGLTSPGLSLSLSSGSGAGSSSFSR | 1 |
| 23367  | LARP1    | la related protein isoform 1                                                | TamR | HRG | up      | 1.00 | NA   | NA   | 4.77  | NA    | NA    | 11.08 | NP_056130    | SLPTTVPEPNYR                           | 2 |

|                  |                                                               |      |     |         |      |      |       |       |       |       |       |              |                                  |   |
|------------------|---------------------------------------------------------------|------|-----|---------|------|------|-------|-------|-------|-------|-------|--------------|----------------------------------|---|
| 3993 LLGL2       | lethal giant larvae homolog 2 isoform a                       | WT   | E2  | down    | 1.00 | NA   | NA    | 0.59  | NA    | NA    | 0.26  | NP_004515    | ARNSGTQSDGEEKQPLVMER             | 2 |
| 4000 LMNA        | lamin A/C isoform 2                                           | WT   | E2  | down    | 1.00 | 0.56 | 0.73  | 0.97  | 0.27  | 0.24  | 0.32  | NP_005563    | LRLSPSPTSQR                      | 2 |
| 4000 LMNA        | lamin A/C isoform 2                                           | WT   | HRG | down    | 1.00 | 0.48 | 0.90  | 0.92  | 0.20  | 0.40  | 0.39  | NP_005563    | LRLSPSPTSQR                      | 2 |
| 4000 LMNA        | lamin A/C isoform 2                                           | TamR | E2  | down    | 1.00 | 0.59 | 0.73  | 0.85  | 0.36  | 0.26  | 0.56  | NP_005563    | LRLSPSPTSQR                      | 2 |
| 4000 LMNA        | lamin A/C isoform 2                                           | TamR | HRG | down    | 1.00 | 1.11 | NA    | 1.09  | 0.67  | NA    | 0.65  | NP_005563    | LRLSPSPTSQR                      | 2 |
| 4001 LMNB1       | lamin B1                                                      | WT   | E2  | down    | 1.00 | 0.76 | 0.53  | NA    | 0.68  | 0.43  | NA    | NP_005564    | LKLSPPSSSR                       | 2 |
| 4001 LMNB1       | lamin B1                                                      | WT   | HRG | down    | 1.00 | NA   | 0.93  | 0.64  | NA    | 0.74  | 0.82  | NP_005564    | LKLSPPSSSR                       | 2 |
| 728927 LOC728927 | PREDICTED: similar to hCG40110                                | WT   | E2  | up      | 1.00 | NA   | 1.28  | NA    | NA    | 5.52  | NA    | XP_001128828 | ASSWFSLHRIKRIHTR                 | 2 |
| 26065 LSM14A     | LSM14 homolog A isoform b                                     | WT   | E2  | down    | 1.00 | 0.68 | 0.45  | 0.69  | 0.55  | 0.34  | 0.36  | NP_056393    | SSPQLDPLRKSPTEMQAVQTASAHLPPAAVGR | 2 |
| 26065 LSM14A     | LSM14 homolog A isoform b                                     | WT   | HRG | down    | 1.00 | 0.60 | NA    | NA    | 0.39  | NA    | NA    | NP_056393    | SSPQLDPLRKSPTEMQAVQTASAHLPPAAVGR | 2 |
| 26065 LSM14A     | LSM14 homolog A isoform b                                     | TamR | E2  | down    | 1.00 | NA   | 0.59  | 0.85  | NA    | 0.35  | 0.69  | NP_056393    | SSPQLDPLRKSPTEMQAVQTASAHLPPAAVGR | 2 |
| 10916 MAGED2     | melanoma antigen family D, 2                                  | WT   | E2  | up,down | 1.00 | NA   | 1.56  | NA    | NA    | 0.66  | NA    | NP_055414    | ARKVKHLGDGEEGSSDQSQASGTTGGR      | 4 |
| 4133 MAP2        | microtubule-associated protein 2 isoform 1                    | WT   | E2  | down    | 1.00 | NA   | 0.37  | 0.33  | NA    | 0.33  | 0.26  | NP_002365    | VAIIRTPPKSPATPK                  | 2 |
| 4133 MAP2        | microtubule-associated protein 2 isoform 1                    | WT   | HRG | down    | 1.00 | NA   | NA    | 0.31  | NA    | NA    | 0.11  | NP_002365    | TPGTPGTPSYPR                     | 2 |
| 4133 MAP2        | microtubule-associated protein 2 isoform 1                    | WT   | HRG | down    | 1.00 | NA   | 0.55  | NA    | NA    | 0.61  | NA    | NP_002365    | VAIIRTPPKSPATPK                  | 2 |
| 5594 MAPK1       | mitogen-activated protein kinase 1                            | WT   | HRG | up      | 1.00 | 3.92 | 6.97  | 6.89  | 7.99  | 11.01 | 7.05  | NP_620407    | VADPDHDHTGFLTVEYVATR             | 1 |
| 5594 MAPK1       | mitogen-activated protein kinase 1                            | TamR | HRG | up      | 1.00 | NA   | 13.22 | 15.95 | NA    | 10.79 | 9.57  | NP_620407    | VADPDHDHTGFLTVEYVATR             | 1 |
| 5595 MAPK3       | mitogen-activated protein kinase 3 isoform 2                  | WT   | E2  | down    | 1.00 | NA   | NA    | 0.40  | NA    | NA    | 0.39  | NP_001035145 | IADPEHDHTGFLTVEYVATR             | 1 |
| 5595 MAPK3       | mitogen-activated protein kinase 3 isoform 2                  | WT   | HRG | up      | 1.00 | 2.82 | 21.85 | 15.52 | 0.75  | 48.39 | 20.03 | NP_001035145 | IADPEHDHTGFLTVEYVATR             | 1 |
| 5595 MAPK3       | mitogen-activated protein kinase 3 isoform 2                  | TamR | E2  | down    | 1.00 | 1.07 | 0.62  | 0.15  | 0.20  | 0.30  | 0.18  | NP_001035145 | IADPEHDHTGFLTVEYVATR             | 1 |
| 5595 MAPK3       | mitogen-activated protein kinase 3 isoform 2                  | TamR | HRG | up      | 1.00 | 6.75 | 14.54 | 18.23 | 12.78 | 11.61 | 11.19 | NP_001035145 | IADPEHDHTGFLTVEYVATR             | 1 |
| 4137 MAPT        | microtubule-associated protein tau isoform 2                  | WT   | E2  | down    | 1.00 | 0.77 | 0.59  | 0.82  | 0.53  | 0.34  | 0.57  | NP_005901    | KVAVVRTPPKSPSSAK                 | 2 |
| 4137 MAPT        | microtubule-associated protein tau isoform 2                  | WT   | E2  | down    | 1.00 | 0.72 | 0.53  | 0.73  | 0.47  | 0.25  | 0.32  | NP_005901    | VAVVRTPPKSPSSAK                  | 2 |
| 4137 MAPT        | microtubule-associated protein tau isoform 2                  | WT   | HRG | down    | 1.00 | 0.64 | NA    | NA    | 0.32  | NA    | NA    | NP_005901    | KVAVVRTPPKSPSSAK                 | 2 |
| 4137 MAPT        | microtubule-associated protein tau isoform 2                  | WT   | HRG | down    | 1.00 | 0.44 | 0.92  | NA    | 0.16  | 0.38  | NA    | NP_005901    | VAVVRTPPKSPSSAK                  | 2 |
| 4137 MAPT        | microtubule-associated protein tau isoform 2                  | TamR | E2  | down    | 1.00 | NA   | NA    | 0.07  | NA    | NA    | 0.21  | NP_005901    | TDHGAEIYKSPVVGDTSPR              | 3 |
| 4137 MAPT        | microtubule-associated protein tau isoform 2                  | TamR | E2  | down    | 1.00 | NA   | 0.75  | NA    | NA    | 0.49  | NA    | NP_005901    | VAVVRTPPKSPSSAK                  | 2 |
| 4137 MAPT        | microtubule-associated protein tau isoform 2                  | TamR | HRG | down    | 1.00 | NA   | NA    | 0.80  | NA    | NA    | 0.41  | NP_005901    | TDHGAEIYKSPVVGDTSPR              | 3 |
| 4147 MATN2       | matrilin 2 isoform a precursor                                | TamR | HRG | down    | 1.00 | NA   | NA    | 0.46  | NA    | NA    | 1.11  | NP_002371    | VPRAAIVFDGR                      | 1 |
| 9782 MATR3       | matrin 3                                                      | TamR | HRG | up      | 1.00 | NA   | NA    | 7.75  | NA    | NA    | 8.66  | NP_061322    | RDSFDDRGPSLNPVLVDYDHGSR          | 1 |
| 4171 MCM2        | minichromosome maintenance complex component 2                | WT   | E2  | down    | 1.00 | NA   | NA    | 0.74  | NA    | NA    | 0.44  | NP_004517    | GLLYDSEDEEERPAR                  | 1 |
| 4236 MFAP1       | microfibrillar-associated protein 1                           | TamR | HRG | down    | 1.00 | NA   | NA    | 0.65  | NA    | NA    | 0.62  | NP_005917    | RPDYAFMESSDEEDEFQIK              | 2 |
| 79083 MLPH       | melanophilin isoform 1                                        | WT   | E2  | down    | 1.00 | NA   | 0.77  | 0.80  | NA    | 0.60  | 0.66  | NP_077006    | LLSVHDFDFEGSDSDTQPOGHSLLHSSVPEAR | 2 |
| 79083 MLPH       | melanophilin isoform 1                                        | WT   | HRG | down    | 1.00 | 0.66 | NA    | NA    | 0.36  | NA    | NA    | NP_077006    | LLSVHDFDFEGSDSDTQPOGHSLLHSSVPEAR | 2 |
| 79083 MLPH       | melanophilin isoform 1                                        | WT   | HRG | down    | 1.00 | 0.72 | NA    | NA    | 0.42  | NA    | NA    | NP_077006    | LLSVHDFDFEGSDSDTQPOGHSLLHSSVPEAR | 1 |
| 23164 MPRIP      | myosin phosphatase-Rho interacting protein isoform 2          | WT   | E2  | down    | 1.00 | 0.79 | 0.02  | NA    | 0.78  | 0.02  | NA    | NP_958431    | SKTFDWAEFRPQQALAQER              | 1 |
| 23164 MPRIP      | myosin phosphatase-Rho interacting protein isoform 2          | WT   | HRG | down    | 1.00 | NA   | 0.04  | NA    | NA    | 0.03  | NA    | NP_958431    | SKTFDWAEFRPQQALAQER              | 1 |
| 4869 NPM1        | nucleophosmin 1 isoform 1                                     | WT   | E2  | down    | 1.00 | 0.73 | 0.55  | 0.88  | 0.73  | 0.57  | 0.83  | NP_002511    | MEDSMDMDMSPLRPQNYLFGCELK         | 1 |
| 4869 NPM1        | nucleophosmin 1 isoform 1                                     | WT   | HRG | down    | 1.00 | 0.54 | 0.82  | 0.85  | 0.38  | 0.98  | 1.04  | NP_002511    | MEDSMDMDMSPLRPQNYLFGCELK         | 1 |
| 64710 NUCKS1     | nuclear casein kinase and cyclin-dependent kinase substrate 1 | WT   | E2  | down    | 1.00 | NA   | NA    | 0.64  | NA    | NA    | 0.49  | NP_073568    | KVDYSQFQESDDADEYGR               | 1 |
| 64710 NUCKS1     | nuclear casein kinase and cyclin-dependent kinase substrate 1 | WT   | E2  | down    | 1.00 | NA   | NA    | 0.59  | NA    | NA    | 0.41  | NP_073568    | KVDYSQFQESDDADEYGRDSDGPPTK       | 1 |
| 64710 NUCKS1     | nuclear casein kinase and cyclin-dependent kinase substrate 1 | WT   | E2  | down    | 1.00 | NA   | NA    | 0.65  | NA    | NA    | 0.45  | NP_073568    | VVDYSQFQESDDADEYGR               | 1 |
| 64710 NUCKS1     | nuclear casein kinase and cyclin-dependent kinase substrate 1 | WT   | E2  | down    | 1.00 | NA   | NA    | 0.61  | NA    | NA    | 0.41  | NP_073568    | VVDYSQFQESDDADEYGRDSDGPPTK       | 1 |
| 64710 NUCKS1     | nuclear casein kinase and cyclin-dependent kinase substrate 1 | WT   | E2  | down    | 1.00 | NA   | NA    | 0.59  | NA    | NA    | 0.42  | NP_073568    | VVDYSQFQESDDADEYGRDSDGPPTK       | 1 |
| 64710 NUCKS1     | nuclear casein kinase and cyclin-dependent kinase substrate 1 | WT   | HRG | down    | 1.00 | NA   | 0.66  | 0.55  | NA    | 0.69  | 0.45  | NP_073568    | VVDYSQFQESDDADEYGR               | 1 |
| 64710 NUCKS1     | nuclear casein kinase and cyclin-dependent kinase substrate 1 | WT   | HRG | down    | 1.00 | 0.55 | NA    | NA    | 0.47  | NA    | NA    | NP_073568    | VVDYSQFQESDDADEYGRDSDGPPTK       | 1 |
| 64710 NUCKS1     | nuclear casein kinase and cyclin-dependent kinase substrate 1 | TamR | E2  | down    | 1.00 | 0.57 | 0.96  | NA    | 0.46  | 0.83  | NA    | NP_073568    | KVDYSQFQESDDADEYGR               | 1 |
| 55690 PACS1      | phosphofurin acidic cluster sorting protein 1                 | WT   | E2  | down    | 1.00 | NA   | 0.77  | 0.58  | NA    | 0.40  | 0.34  | NP_060496    | TNSSDSERSPDLGHSTQIPR             | 2 |
| 55690 PACS1      | phosphofurin acidic cluster sorting protein 1                 | WT   | HRG | down    | 1.00 | 0.53 | 0.88  | NA    | 0.35  | 0.51  | NA    | NP_060496    | TNSSDSERSPDLGHSTQIPR             | 2 |
| 55690 PACS1      | phosphofurin acidic cluster sorting protein 1                 | TamR | E2  | down    | 1.00 | 0.45 | NA    | 0.78  | 0.24  | NA    | 0.46  | NP_060496    | TNSSDSERSPDLGHSTQIPR             | 2 |
| 55690 PACS1      | phosphofurin acidic cluster sorting protein 1                 | TamR | HRG | down    | 1.00 | NA   | 0.74  | NA    | NA    | 0.32  | NA    | NP_060496    | TNSSDSERSPDLGHSTQIPR             | 2 |
| 10298 PAK4       | p21-activated kinase 4 isoform 1                              | WT   | E2  | down    | 1.00 | 0.99 | 0.74  | NA    | 0.96  | 0.65  | NA    | NP_005875    | SLVGTPYYMAPELISR                 | 1 |
| 55742 PARVA      | parvin, alpha                                                 | WT   | E2  | down    | 1.00 | NA   | 0.34  | 0.22  | NA    | 1.09  | 0.15  | NP_060692    | SPSVPKSPTPKSPPSR                 | 2 |
| 55742 PARVA      | parvin, alpha                                                 | WT   | HRG | down    | 1.00 | 0.46 | NA    | NA    | 0.72  | NA    | NA    | NP_060692    | SPSVPKSPTPKSPPSR                 | 2 |
| 51585 PCF11      | pre-mRNA cleavage complex II protein Pcf11                    | TamR | E2  | down    | 1.00 | 0.88 | NA    | NA    | 0.60  | NA    | NA    | NP_056969    | SRSPIIHSFK                       | 2 |
| 5130 PCYT1A      | phosphate cytidylyltransferase 1, choline, alpha              | WT   | E2  | down    | 1.00 | NA   | 0.40  | 0.58  | NA    | 0.34  | 0.35  | NP_005008    | WPFSGKTSPPCSPANLSR               | 2 |
| 5130 PCYT1A      | phosphate cytidylyltransferase 1, choline, alpha              | WT   | HRG | down    | 1.00 | NA   | 0.30  | 0.34  | NA    | 0.35  | 0.27  | NP_005008    | TSPPCSPANLSR                     | 2 |
| 5130 PCYT1A      | phosphate cytidylyltransferase 1, choline, alpha              | TamR | E2  | down    | 1.00 | 0.38 | NA    | 0.56  | 0.45  | NA    | 0.41  | NP_005008    | TSPPCSPANLSR                     | 2 |
| 5130 PCYT1A      | phosphate cytidylyltransferase 1, choline, alpha              | TamR | HRG | down    | 1.00 | 0.59 | 0.76  | 1.27  | 0.49  | 0.68  | 0.54  | NP_005008    | TSPPCSPANLSR                     | 2 |
| 5160 PDHA1       | pyruvate dehydrogenase (lipoamide) alpha 1 precursor          | WT   | E2  | down    | 1.00 | 0.40 | 0.29  | 0.41  | 0.65  | 0.50  | 0.56  | NP_000275    | YHGHSMSDPGVSYR                   | 1 |
| 5160 PDHA1       | pyruvate dehydrogenase (lipoamide) alpha 1 precursor          | WT   | E2  | down    | 1.00 | NA   | 0.18  | 0.22  | NA    | 0.23  | 0.17  | NP_000275    | YHGHSMSDPGVSYR                   | 2 |
| 5160 PDHA1       | pyruvate dehydrogenase (lipoamide) alpha 1 precursor          | WT   | HRG | down    | 1.00 | 0.29 | 0.33  | 0.19  | 0.18  | 0.45  | 0.36  | NP_000275    | YHGHSMSDPGVSYR                   | 1 |
| 5160 PDHA1       | pyruvate dehydrogenase (lipoamide) alpha 1 precursor          | WT   | HRG | down    | 1.00 | NA   | 0.04  | 0.17  | NA    | 0.06  | 0.29  | NP_000275    | YHGHSMSDPGVSYR                   | 2 |
| 5160 PDHA1       | pyruvate dehydrogenase (lipoamide) alpha 1 precursor          | TamR | E2  | down    | 1.00 | NA   | NA    | 0.50  | NA    | NA    | 0.34  | NP_000275    | YHGHSMSDPGVSYR                   | 1 |
| 23037 PDZD2      | PDZ domain containing 2                                       | TamR | HRG | up      | 1.00 | NA   | NA    | 12.82 | NA    | NA    | 8.92  | NP_835260    | TSVDTGQVSRPENPSPASPRVTKCK        | 3 |
| 27043 PELP1      | proline, glutamic acid and leucine rich protein 1             | WT   | E2  | down    | 1.00 | NA   | 0.59  | 0.76  | NA    | 0.43  | 0.43  | NP_055204    | LRSPRGSPDGLQTKGPSAPK             | 2 |
| 27043 PELP1      | proline, glutamic acid and leucine rich protein 1             | WT   | HRG | down    | 1.00 | 0.54 | 0.80  | NA    | 0.33  | 0.65  | NA    | NP_055204    | LRSPRGSPDGLQTKGPSAPK             | 2 |
| 80012 PHC3       | polyhomeotic like 3                                           | WT   | E2  | down    | 1.00 | 0.87 | 0.56  | 0.78  | 0.87  | 0.50  | 0.58  | NP_079223    | MDRTPPPPTLSPAIVTGR               | 2 |
| 84295 PHF6       | PHD finger protein 6 isoform 1                                | TamR | HRG | down    | 1.00 | NA   | 0.79  | NA    | NA    | 0.43  | NA    | NP_115834    | DRSPHRSSSDTRPK                   | 2 |
| 55361 PI4K2A     | phosphatidylinositol 4-kinase type 2 alpha                    | WT   | HRG | down    | 1.00 | NA   | 0.01  | 0.81  | NA    | 0.01  | 0.97  | NP_060895    | VAAAAGSGPSPGSPGHDR               | 2 |
| 55361 PI4K2A     | phosphatidylinositol 4-kinase type 2 alpha                    | TamR | E2  | down    | 1.00 | NA   | NA    | 0.59  | NA    | NA    | 0.47  | NP_060895    | VAAAAGSGPSPGSPGHDR               | 2 |
| 55361 PI4K2A     | phosphatidylinositol 4-kinase type 2 alpha                    | TamR | HRG | up      | 1.00 | NA   | NA    | 1.68  | NA    | NA    | 2.08  | NP_060895    | VAAAAGSGPSPGSPGHDR               | 2 |
| 8502 PKP4        | plakophilin 4 isoform a                                       | WT   | E2  | down    | 1.00 | NA   | 0.40  | 0.66  | NA    | 0.41  | 0.43  | NP_003619    | AASPYSQRPASPTAIR                 | 2 |
| 8502 PKP4        | plakophilin 4 isoform a                                       | WT   | HRG | down    | 1.00 | 0.60 | NA    | NA    | 0.57  | NA    | NA    | NP_003619    | AASPYSQRPASPTAIR                 | 2 |
| 5339 PLEC1       | plectin 1 isoform 3                                           | WT   | HRG | up,down | 1.00 | NA   | 2.10  | NA    | NA    | 0.33  | NA    | NP_958781    | GYSPYSYVSGSGTAGSR                | 1 |
| 5339 PLEC1       | plectin 1 isoform 3                                           | WT   | HRG | up      | 1.00 | NA   | 1.43  | 1.78  | NA    | 6.60  | 1.16  | NP_958781    | SSSVGSSSSYPISPAVSR               | 2 |
| 5339 PLEC1       | plectin 1 isoform 3                                           | TamR | HRG | up      | 1.00 | NA   | NA    | 5.22  | NA    | NA    | 10.40 | NP_958781    | SSSVGSSSSYPISPAVSR               | 2 |
| 5371 PML         | promyelocytic leukemia protein isoform 6                      | WT   | E2  | up,down | 1.00 | 0.19 | 1.14  | 1.65  | 0.13  | 0.34  | 0.56  | NP_002666    | AVSPPHLDGPPSPR                   | 2 |
| 5371 PML         | promyelocytic leukemia protein isoform 6                      | WT   | HRG | up,down | 1.00 | 0.91 | 1.56  | 0.01  | 0.29  | 0.31  | 0.00  | NP_002666    | AVSPPHLDGPPSPR                   | 2 |
| 5411 PNN         | pinin, desmosome associated protein                           | WT   | E2  | down    | 1.00 | NA   | NA    | 0.53  | NA    | NA    | 0.25  | NP_002678    | RESRQESDEPDDVKKPALQSSVATSK       | 2 |
| 8500 PPF1A1      | PTPRF interacting protein alpha 1 isoform b                   | WT   | E2  | down    | 1.00 | NA   | 0.50  | NA    | NA    | 0.27  | NA    | NP_003617    | GALHTVSHEDIR                     | 1 |
| 8500 PPF1A1      | PTPRF interacting protein alpha 1 isoform b                   | WT   | HRG | down    | 1.00 | 0.64 | NA    | NA    | 0.44  | NA    | NA    | NP_003617    | GALHTVSHEDIR                     | 1 |
| 8500 PPF1A1      | PTPRF interacting protein alpha 1 isoform b                   | TamR | E2  | down    | 1.00 | NA   | NA    | 0.61  | NA    | NA    | 0.45  | NP_003617    | GALHTVSHEDIR                     | 1 |
| 51535 PPHLN1     | periplin 1 isoform 5                                          | WT   | E2  | down    | 1.00 | NA   | 0.41  | NA    | NA    | 0.34  | NA    | NP_958846    | DKERPVQLKTSRDTSPSSGSAVSSSK       | 2 |
| 51535 PPHLN1     | periplin 1 isoform 5                                          | WT   | E2  | down    | 1.00 | NA   | 0.40  | 0.57  | NA    | 0.42  | 0.39  | NP_958846    | ERPVSQKTSRDTSPSSGSAVSSSK         | 2 |

|        |             |                                                                             |      |     |         |      |      |      |      |      |      |           |                            |                               |   |
|--------|-------------|-----------------------------------------------------------------------------|------|-----|---------|------|------|------|------|------|------|-----------|----------------------------|-------------------------------|---|
| 51535  | PPHLN1      | periphilin 1 isoform 5                                                      | WT   | HRG | down    | 1.00 | 0.55 | NA   | NA   | 0.30 | NA   | NP_958846 | ERPVSQSLKTRSDTSPSSGSAVSSSK | 2                             |   |
| 9360   | PIIG        | peptidylprolyl isomerase G                                                  | WT   | E2  | down    | 1.00 | NA   | 0.52 | 0.77 | NA   | 0.38 | 0.43      | NP_004783                  | FRRSETPPHWR                   | 2 |
| 9360   | PIIG        | peptidylprolyl isomerase G                                                  | WT   | HRG | down    | 1.00 | 0.65 | 0.72 | NA   | 0.40 | 0.58 | NA        | NP_004783                  | FRRSETPPHWR                   | 2 |
| 9360   | PIIG        | peptidylprolyl isomerase G                                                  | TamR | E2  | down    | 1.00 | 0.61 | NA   | NA   | 0.38 | NA   | NA        | NP_004783                  | RSETPPHWR                     | 2 |
| 5510   | PPP1R7      | protein phosphatase 1, regulatory subunit 7                                 | WT   | E2  | down    | 1.00 | NA   | NA   | 1.23 | NA   | NA   | 0.62      | NP_002703                  | GAGQQSQSEMMEVDRRVESEESGDEEGKK | 2 |
| 8899   | PRPF4B      | serine/threonine-protein kinase PRP4K                                       | WT   | E2  | down    | 1.00 | NA   | 0.48 | 0.68 | NA   | 0.47 | 0.49      | NP_003904                  | LCDFGSASHVADNDITPYLVSR        | 1 |
| 8899   | PRPF4B      | serine/threonine-protein kinase PRP4K                                       | WT   | HRG | down    | 1.00 | 0.44 | 0.66 | NA   | 0.24 | 0.71 | NA        | NP_003904                  | LCDFGSASHVADNDITPYLVSR        | 1 |
| 8899   | PRPF4B      | serine/threonine-protein kinase PRP4K                                       | TamR | E2  | down    | 1.00 | 0.94 | 0.82 | 0.70 | 0.95 | 0.63 | 0.52      | NP_003904                  | LCDFGSASHVADNDITPYLVSR        | 1 |
| 10728  | PTGES3      | inactive progesterone receptor, 23 kD                                       | TamR | HRG | down    | 1.00 | NA   | NA   | 0.83 | NA   | NA   | 0.64      | NP_006592                  | DWEDDSDSDMSNDFR               | 1 |
| 389677 | RBM12B      | RNA binding motif protein 12B                                               | WT   | E2  | up      | 1.00 | NA   | 0.69 | NA   | NA   | 4.56 | NA        | NP_976324                  | RPPEEDFRHSPEEDFR              | 1 |
| 389677 | RBM12B      | RNA binding motif protein 12B                                               | WT   | E2  | down    | 1.00 | NA   | NA   | 0.71 | NA   | NA   | 0.48      | NP_976324                  | RPPEEDFRHSPEEDFRQSPQEHFR      | 2 |
| 389677 | RBM12B      | RNA binding motif protein 12B                                               | WT   | HRG | down    | 1.00 | NA   | 0.60 | NA   | NA   | 0.51 | NA        | NP_976324                  | RPPEEDFRHSPEEDFRQSPQEHFR      | 2 |
| 389677 | RBM12B      | RNA binding motif protein 12B                                               | TamR | E2  | down    | 1.00 | 0.68 | 0.77 | 0.79 | 0.51 | 0.50 | 0.54      | NP_976324                  | RPPEEDFRHSPEEDFRQSPQEHFR      | 2 |
| 389677 | RBM12B      | RNA binding motif protein 12B                                               | TamR | HRG | down    | 1.00 | NA   | 0.78 | NA   | NA   | 0.46 | NA        | NP_976324                  | RPPEEDFRHSPEEDFRQSPQEHFR      | 2 |
| 10432  | RBM14       | RNA binding motif protein 14                                                | WT   | E2  | down    | 1.00 | 0.79 | 0.52 | NA   | 0.77 | 0.42 | NA        | NP_006319                  | QPTPPFFGR                     | 1 |
| 10432  | RBM14       | RNA binding motif protein 14                                                | WT   | HRG | down    | 1.00 | NA   | 0.63 | NA   | NA   | 0.52 | NA        | NP_006319                  | QPTPPFFGR                     | 1 |
| 64783  | RBM15       | RNA binding motif protein 15                                                | WT   | E2  | down    | 1.00 | NA   | 0.75 | 0.74 | NA   | 0.59 | 0.47      | NP_073605                  | HCAPSPDRSPELSSSR              | 2 |
| 64783  | RBM15       | RNA binding motif protein 15                                                | WT   | E2  | down    | 1.00 | NA   | NA   | 0.82 | NA   | NA   | 0.56      | NP_073605                  | HLDRSPESDRPR                  | 1 |
| 64783  | RBM15       | RNA binding motif protein 15                                                | WT   | E2  | down    | 1.00 | NA   | 0.53 | NA   | NA   | 0.64 | NA        | NP_073605                  | SLSPGGGAALGYR                 | 1 |
| 64783  | RBM15       | RNA binding motif protein 15                                                | WT   | E2  | down    | 1.00 | 0.93 | 0.50 | 0.71 | 0.86 | 0.47 | 0.65      | NP_073605                  | SRSPDKDTYPPASVVGASVGGHR       | 2 |
| 64783  | RBM15       | RNA binding motif protein 15                                                | WT   | HRG | down    | 1.00 | NA   | 0.66 | NA   | NA   | 0.66 | NA        | NP_073605                  | HCAPSPDRSPELSSSR              | 2 |
| 64783  | RBM15       | RNA binding motif protein 15                                                | WT   | HRG | down    | 1.00 | 0.76 | 0.77 | 0.81 | 0.66 | 0.72 | 0.71      | NP_073605                  | SRSPDKDTYPPASVVGASVGGHR       | 2 |
| 64783  | RBM15       | RNA binding motif protein 15                                                | TamR | E2  | down    | 1.00 | 0.55 | NA   | 0.79 | 0.32 | NA   | 0.52      | NP_073605                  | HCAPSPDRSPELSSSR              | 2 |
| 9584   | RBM39       | RNA binding motif protein 39 isoform b                                      | WT   | E2  | down    | 1.00 | NA   | 0.42 | 0.88 | NA   | 0.35 | 0.51      | NP_004893                  | YRSPYSGPK                     | 1 |
| 9584   | RBM39       | RNA binding motif protein 39 isoform b                                      | WT   | HRG | down    | 1.00 | 0.80 | 0.64 | NA   | 0.69 | 0.34 | NA        | NP_004893                  | YRSPYSGPK                     | 1 |
| 85021  | REPS1       | RALBP1 associated Eps domain containing 1 isoform a                         | WT   | HRG | down    | 1.00 | NA   | 0.63 | NA   | NA   | 0.67 | NA        | NP_114128                  | SHSGTSPDNTAPPPPPRPQPSHSR      | 2 |
| 85021  | REPS1       | RALBP1 associated Eps domain containing 1 isoform a                         | TamR | E2  | down    | 1.00 | 0.56 | NA   | 0.72 | 0.44 | NA   | 0.58      | NP_114128                  | SHSGTSPDNTAPPPPPRPQPSHSR      | 2 |
| 84220  | RGPD5       | RANBP2-like and GRIP domain containing 5 isoform 2                          | WT   | HRG | up      | 1.00 | NA   | NA   | 3.25 | NA   | NA   | 35.76     | NP_115636                  | QLCGTER                       | 1 |
| 60626  | RIC8A       | resistance to inhibitors of cholinesterase 8 homolog A                      | WT   | E2  | down    | 1.00 | NA   | NA   | 0.78 | NA   | NA   | 0.66      | NP_068751                  | GLMAGGRPEGQYSEDEDTTDEYKEAK    | 2 |
| 9912   | RICH2       | Rho GTPase-activating protein RICH2                                         | WT   | E2  | up      | 1.00 | NA   | NA   | 0.87 | NA   | NA   | 26.23     | NP_055674                  | LVLDMDSSR                     | 1 |
| 127099 | RPLP1_1_124 | PREDICTED: hypothetical protein                                             | WT   | E2  | up,down | 1.00 | NA   | NA   | 3.14 | NA   | NA   | 0.61      | XP_060328                  | MASISQLACIYLVFILYEDEVTVREDK   | 3 |
| 6194   | RPS6        | ribosomal protein S6                                                        | WT   | E2  | down    | 1.00 | NA   | 0.79 | 0.91 | NA   | 0.07 | 0.19      | NP_001001                  | RLSSLRASTSK                   | 2 |
| 6194   | RPS6        | ribosomal protein S6                                                        | WT   | HRG | up,down | 1.00 | NA   | NA   | 2.94 | NA   | NA   | 0.28      | NP_001001                  | LSSLRASTSK                    | 2 |
| 6194   | RPS6        | ribosomal protein S6                                                        | WT   | HRG | down    | 1.00 | 0.83 | NA   | NA   | 0.44 | NA   | NA        | NP_001001                  | RLSSLRASTSK                   | 2 |
| 6194   | RPS6        | ribosomal protein S6                                                        | WT   | HRG | up,down | 1.00 | NA   | NA   | 1.76 | NA   | NA   | 0.54      | NP_001001                  | RLSSLRASTSK                   | 3 |
| 58506  | SCAF1       | SR-related CTD-associated factor 1                                          | WT   | E2  | down    | 1.00 | 0.53 | 0.60 | 0.75 | 0.20 | 0.40 | 0.35      | NP_067051                  | QRSPSPAPAPAAAAAGPPTR          | 2 |
| 58506  | SCAF1       | SR-related CTD-associated factor 1                                          | WT   | HRG | down    | 1.00 | 0.57 | 0.91 | 0.82 | 0.32 | 0.53 | 0.45      | NP_067051                  | QRSPSPAPAPAAAAAGPPTR          | 2 |
| 58506  | SCAF1       | SR-related CTD-associated factor 1                                          | TamR | E2  | down    | 1.00 | NA   | 0.78 | 0.66 | NA   | 0.41 | 0.42      | NP_067051                  | QRSPSPAPAPAAAAAGPPTR          | 2 |
| 58506  | SCAF1       | SR-related CTD-associated factor 1                                          | TamR | HRG | down    | 1.00 | 0.78 | 0.69 | 0.92 | 0.53 | 0.40 | 0.69      | NP_067051                  | QRSPSPAPAPAAAAAGPPTR          | 2 |
| 9919   | SEC16A      | SEC16 homolog A                                                             | WT   | HRG | up      | 1.00 | NA   | 1.07 | 0.90 | NA   | 1.12 | 1.89      | NP_055681                  | SLHSAHSLASR                   | 2 |
| 9919   | SEC16A      | SEC16 homolog A                                                             | TamR | E2  | down    | 1.00 | 0.93 | NA   | 1.23 | 0.65 | NA   | 0.79      | NP_055681                  | SLHSAHSLASR                   | 2 |
| 9919   | SEC16A      | SEC16 homolog A                                                             | TamR | HRG | down    | 1.00 | NA   | 0.85 | NA   | NA   | 0.43 | NA        | NP_055681                  | SLHSAHSLASR                   | 2 |
| 4735   | SEPT2       | septin 2                                                                    | WT   | E2  | down    | 1.00 | 0.67 | 0.47 | 0.73 | 0.56 | 0.35 | 0.43      | NP_004395                  | IYHLPDAEDEDDEFKEQTR           | 1 |
| 4735   | SEPT2       | septin 2                                                                    | WT   | HRG | down    | 1.00 | 0.39 | 0.65 | 0.81 | 0.16 | 0.49 | 0.73      | NP_004395                  | IYHLPDAEDEDDEFKEQTR           | 1 |
| 4735   | SEPT2       | septin 2                                                                    | TamR | E2  | down    | 1.00 | 0.40 | 0.42 | 0.41 | 0.20 | 0.17 | 0.17      | NP_004395                  | IYHLPDAEDEDDEFKEQTR           | 1 |
| 4735   | SEPT2       | septin 2                                                                    | TamR | HRG | down    | 1.00 | NA   | 0.60 | 0.88 | NA   | 0.35 | 0.79      | NP_004395                  | IYHLPDAEDEDDEFKEQTR           | 1 |
| 10801  | SEPT9       | septin 9 isoform c                                                          | WT   | E2  | down    | 1.00 | 0.97 | 0.68 | NA   | 0.77 | 0.62 | NA        | NP_006631                  | SFEVEEVETPNSTPPR              | 1 |
| 10801  | SEPT9       | septin 9 isoform c                                                          | WT   | HRG | down    | 1.00 | 0.75 | 0.86 | NA   | 0.44 | 0.66 | NA        | NP_006631                  | SFEVEEVETPNSTPPR              | 1 |
| 26135  | SERBP1      | SERPINE1 mRNA binding protein 1 isoform 1                                   | WT   | E2  | down    | 1.00 | NA   | 0.54 | 0.78 | NA   | 0.28 | 0.39      | NP_001018077               | SKSEEAHAEDSVMDDHFR            | 1 |
| 26135  | SERBP1      | SERPINE1 mRNA binding protein 1 isoform 1                                   | WT   | HRG | down    | 1.00 | 0.59 | 0.52 | NA   | 0.32 | 0.32 | NA        | NP_001018077               | SKSEEAHAEDSVMDDHFR            | 1 |
| 57794  | SF4         | splicing factor 4                                                           | WT   | E2  | down    | 1.00 | NA   | 0.38 | 0.71 | NA   | 0.32 | 0.88      | NP_757386                  | AVQGHQHGYDSDDEVDSELGTWEHQLR   | 1 |
| 57794  | SF4         | splicing factor 4                                                           | WT   | HRG | down    | 1.00 | 0.58 | 0.75 | NA   | 0.46 | 0.76 | NA        | NP_757386                  | AVQGHQHGYDSDDEVDSELGTWEHQLR   | 1 |
| 6434   | SFRS10      | splicing factor, arginine/serine-rich 10                                    | WT   | E2  | down    | 1.00 | NA   | 0.50 | 0.63 | NA   | 0.42 | 0.35      | NP_004584                  | RHSHSHSPMSTR                  | 2 |
| 6434   | SFRS10      | splicing factor, arginine/serine-rich 10                                    | WT   | E2  | down    | 1.00 | NA   | 0.03 | 0.74 | NA   | 0.08 | 0.41      | NP_004584                  | RHSHSHSPMSTR                  | 3 |
| 6434   | SFRS10      | splicing factor, arginine/serine-rich 10                                    | WT   | E2  | down    | 1.00 | NA   | NA   | 0.83 | NA   | NA   | 0.46      | NP_004584                  | RRHSHSHSPMSTR                 | 3 |
| 6434   | SFRS10      | splicing factor, arginine/serine-rich 10                                    | WT   | HRG | up,down | 1.00 | 0.52 | 0.63 | NA   | 0.37 | 1.89 | NA        | NP_004584                  | RHSHSHSPMSTR                  | 2 |
| 6434   | SFRS10      | splicing factor, arginine/serine-rich 10                                    | WT   | HRG | down    | 1.00 | 0.75 | NA   | NA   | 0.65 | NA   | NA        | NP_004584                  | RPHPTPTGIYMGPRPTYGSSR         | 1 |
| 6434   | SFRS10      | splicing factor, arginine/serine-rich 10                                    | WT   | HRG | down    | 1.00 | 0.50 | 1.12 | NA   | 0.22 | 0.90 | NA        | NP_004584                  | RRSPSPYYSR                    | 2 |
| 6434   | SFRS10      | splicing factor, arginine/serine-rich 10                                    | TamR | E2  | down    | 1.00 | 0.64 | 0.83 | 1.01 | 0.42 | 0.68 | 0.77      | NP_004584                  | RHSHSHSPMSTR                  | 2 |
| 6434   | SFRS10      | splicing factor, arginine/serine-rich 10                                    | TamR | E2  | down    | 1.00 | 0.57 | 0.77 | 0.37 | 0.35 | 0.46 | 0.41      | NP_004584                  | RHSHSHSPMSTR                  | 3 |
| 6434   | SFRS10      | splicing factor, arginine/serine-rich 10                                    | TamR | E2  | down    | 1.00 | 0.68 | 0.72 | 0.99 | 0.35 | 0.42 | 0.64      | NP_004584                  | RRSPSPYYSR                    | 2 |
| 6434   | SFRS10      | splicing factor, arginine/serine-rich 10                                    | TamR | E2  | down    | 1.00 | 0.53 | NA   | NA   | 0.34 | NA   | NA        | NP_004584                  | RSPSPYYSR                     | 2 |
| 6434   | SFRS10      | splicing factor, arginine/serine-rich 10                                    | TamR | HRG | down    | 1.00 | 1.04 | 0.73 | NA   | 0.62 | 0.41 | NA        | NP_004584                  | HSHSHSPMSTR                   | 2 |
| 6434   | SFRS10      | splicing factor, arginine/serine-rich 10                                    | TamR | HRG | down    | 1.00 | NA   | 0.62 | NA   | NA   | 0.46 | NA        | NP_004584                  | RHSHSHSPMSTR                  | 2 |
| 6434   | SFRS10      | splicing factor, arginine/serine-rich 10                                    | TamR | HRG | down    | 1.00 | 0.73 | 0.33 | 0.81 | 0.48 | 0.21 | 0.50      | NP_004584                  | RHSHSHSPMSTR                  | 3 |
| 6434   | SFRS10      | splicing factor, arginine/serine-rich 10                                    | TamR | HRG | down    | 1.00 | 0.57 | NA   | 0.84 | 0.25 | NA   | 1.18      | NP_004584                  | RRSPSPYYSR                    | 2 |
| 6434   | SFRS10      | splicing factor, arginine/serine-rich 10                                    | TamR | HRG | down    | 1.00 | NA   | NA   | 0.81 | NA   | NA   | 0.60      | NP_004584                  | RSPSPYYSR                     | 2 |
| 6426   | SFRS1       | splicing factor, arginine/serine-rich 1 isoform 1                           | WT   | E2  | down    | 1.00 | 0.56 | 0.46 | 0.80 | 0.39 | 0.30 | 0.44      | NP_008855                  | VKVDGPRSPSYGR                 | 2 |
| 6426   | SFRS1       | splicing factor, arginine/serine-rich 1 isoform 1                           | WT   | HRG | down    | 1.00 | 0.51 | 0.73 | 0.67 | 0.29 | 0.52 | 0.63      | NP_008855                  | VKVDGPRSPSYGR                 | 2 |
| 6426   | SFRS1       | splicing factor, arginine/serine-rich 1 isoform 1                           | TamR | E2  | down    | 1.00 | 0.73 | 0.73 | 0.63 | 0.65 | 0.41 | 0.44      | NP_008855                  | VKVDGPRSPSYGR                 | 2 |
| 6426   | SFRS1       | splicing factor, arginine/serine-rich 1 isoform 1                           | TamR | HRG | down    | 1.00 | NA   | NA   | 0.62 | NA   | NA   | 0.33      | NP_008855                  | VDGPRSPSYGR                   | 2 |
| 6426   | SFRS1       | splicing factor, arginine/serine-rich 1 isoform 1                           | TamR | HRG | down    | 1.00 | NA   | NA   | 0.79 | NA   | NA   | 0.66      | NP_008855                  | VKVDGPRSPSYGR                 | 2 |
| 6430   | SFRS5       | splicing factor, arginine/serine-rich 5                                     | WT   | E2  | down    | 1.00 | NA   | NA   | 0.49 | NA   | NA   | 0.51      | NP_001034554               | SRSVSRSPVPEKSQK               | 2 |
| 8683   | SFRS9       | splicing factor, arginine/serine-rich 9                                     | WT   | E2  | down    | 1.00 | 0.73 | 0.40 | 0.69 | 0.74 | 0.32 | 0.46      | NP_003760                  | GSPHYFSPFRPY                  | 1 |
| 8683   | SFRS9       | splicing factor, arginine/serine-rich 9                                     | WT   | E2  | down    | 1.00 | 0.71 | 0.45 | 0.55 | 0.71 | 0.45 | 0.39      | NP_003760                  | GSPHYFSPFRPY                  | 2 |
| 8683   | SFRS9       | splicing factor, arginine/serine-rich 9                                     | WT   | HRG | down    | 1.00 | 0.47 | 0.56 | 0.69 | 0.29 | 0.52 | 0.66      | NP_003760                  | GSPHYFSPFRPY                  | 1 |
| 8683   | SFRS9       | splicing factor, arginine/serine-rich 9                                     | TamR | E2  | down    | 1.00 | 0.94 | 0.96 | 0.86 | 0.91 | 0.69 | 0.65      | NP_003760                  | GSPHYFSPFRPY                  | 1 |
| 8683   | SFRS9       | splicing factor, arginine/serine-rich 9                                     | TamR | HRG | down    | 1.00 | NA   | 0.93 | 0.83 | NA   | 0.76 | 0.61      | NP_003760                  | GSPHYFSPFRPY                  | 1 |
| 8683   | SFRS9       | splicing factor, arginine/serine-rich 9                                     | TamR | HRG | down    | 1.00 | NA   | NA   | 0.91 | NA   | NA   | 0.50      | NP_003760                  | GSPHYFSPFRPY                  | 2 |
| 9368   | SLC9A3R1    | sodium/hydrogen exchanger regulatory factor 1                               | WT   | HRG | up,down | 1.00 | 0.56 | NA   | NA   | 1.51 | NA   | NA        | NP_004243                  | EALAEAALESPPALVR              | 1 |
| 6599   | SMARCC1     | SWI/SNF-related matrix-associated actin-dependent regulator of chromatin c1 | WT   | E2  | down    | 1.00 | 0.71 | 0.41 | 0.60 | 0.56 | 0.33 | 0.31      | NP_003065                  | KHSPSPPPPPTTESR               | 2 |
| 6599   | SMARCC1     | SWI/SNF-related matrix-associated actin-dependent regulator of chromatin c1 | WT   | HRG | down    | 1.00 | NA   | 0.56 | NA   | NA   | 0.37 | NA        | NP_003065                  | KHSPSPPPPPTTESR               | 2 |
| 6599   | SMARCC1     | SWI/SNF-related matrix-associated actin-dependent regulator of chromatin c1 | TamR | E2  | down    | 1.00 | 0.69 | NA   | 0.99 | 0.58 | NA   | 0.94      | NP_003065                  | KHSPSPPPPPTTESR               | 2 |
| 6599   | SMARCC1     | SWI/SNF-related matrix-associated actin-dependent regulator of chromatin c1 | TamR | HRG | down    | 1.00 | 1.33 | 0.62 | NA   | 0.39 | 0.31 | NA        | NP_003065                  | KHSPSPPPPPTTESR               | 2 |
| 79753  | SNIP1       | Smad nuclear interacting protein                                            | WT   | E2  | down    | 1.00 | 0.93 | 0.70 | NA   | 0.99 | 0.61 | NA        | NP_078976                  | RPDHSGGSPSPPTSEPAR            |   |

|               |                                                                       |      |     |         |      |      |      |       |      |      |       |           |                                            |   |
|---------------|-----------------------------------------------------------------------|------|-----|---------|------|------|------|-------|------|------|-------|-----------|--------------------------------------------|---|
| 6625 SNRNP70  | U1 small nuclear ribonucleoprotein 70 kDa                             | TamR | E2  | down    | 1.00 | NA   | NA   | 0.66  | NA   | NA   | 0.49  | NP_003080 | YDERPGSPPLPHR                              | 1 |
| 22938 SNW1    | SKI-interacting protein                                               | WT   | E2  | down    | 1.00 | 0.51 | 0.31 | 0.62  | 0.40 | 0.25 | 0.29  | NP_036377 | GPPSPAPVMHSPSR                             | 2 |
| 22938 SNW1    | SKI-interacting protein                                               | WT   | E2  | down    | 1.00 | NA   | 0.45 | 0.67  | NA   | 0.30 | 0.35  | NP_036377 | GPPSPAPVMHSPSRK                            | 2 |
| 22938 SNW1    | SKI-interacting protein                                               | WT   | HRG | down    | 1.00 | 0.66 | 0.51 | 0.53  | 0.45 | 0.34 | 0.36  | NP_036377 | GPPSPAPVMHSPSR                             | 2 |
| 22938 SNW1    | SKI-interacting protein                                               | WT   | HRG | down    | 1.00 | 0.59 | 0.74 | 0.82  | 0.35 | 0.54 | 0.59  | NP_036377 | GPPSPAPVMHSPSRK                            | 2 |
| 22938 SNW1    | SKI-interacting protein                                               | TamR | E2  | down    | 1.00 | 0.64 | 0.72 | 0.47  | 0.50 | 0.50 | 0.24  | NP_036377 | GPPSPAPVMHSPSR                             | 2 |
| 22938 SNW1    | SKI-interacting protein                                               | TamR | HRG | down    | 1.00 | NA   | NA   | 0.78  | NA   | NA   | 0.62  | NP_036377 | GPPSPAPVMHSPSR                             | 2 |
| 121340 SP7    | osterix                                                               | TamR | E2  | up      | 1.00 | 1.25 | NA   | NA    | 4.70 | NA   | NA    | NP_690599 | GASTGGSGGYYGGSGAGR                         | 2 |
| 6731 SRP72    | signal recognition particle 72kDa                                     | WT   | E2  | down    | 1.00 | 0.96 | 0.60 | 0.99  | 0.99 | 0.61 | 0.54  | NP_008878 | TVSSPPTSPPRGSAAATVSASTSNIIPPR              | 2 |
| 10250 SRRM1   | serine/arginine repetitive matrix 1                                   | WT   | E2  | down    | 1.00 | 0.52 | 0.45 | 0.65  | 0.47 | 0.36 | 0.39  | NP_005830 | HRSPSPATPPPK                               | 2 |
| 10250 SRRM1   | serine/arginine repetitive matrix 1                                   | WT   | E2  | down    | 1.00 | 0.68 | 0.35 | 0.65  | 0.51 | 0.25 | 0.29  | NP_005830 | RLSPSASPPR                                 | 2 |
| 10250 SRRM1   | serine/arginine repetitive matrix 1                                   | WT   | E2  | down    | 1.00 | 1.14 | 0.57 | 0.73  | 0.85 | 0.35 | 0.33  | NP_005830 | RQSPSPSTRPIR                               | 2 |
| 10250 SRRM1   | serine/arginine repetitive matrix 1                                   | WT   | E2  | down    | 1.00 | NA   | NA   | 0.71  | NA   | NA   | 0.42  | NP_005830 | RYSPPIQR                                   | 1 |
| 10250 SRRM1   | serine/arginine repetitive matrix 1                                   | WT   | E2  | down    | 1.00 | 0.74 | NA   | 0.75  | 0.71 | NA   | 0.50  | NP_005830 | RYSPSPPPK                                  | 2 |
| 10250 SRRM1   | serine/arginine repetitive matrix 1                                   | WT   | E2  | down    | 1.00 | 0.62 | 0.35 | 0.55  | 0.50 | 0.27 | 0.28  | NP_005830 | RYSPSPPPKR                                 | 2 |
| 10250 SRRM1   | serine/arginine repetitive matrix 1                                   | WT   | E2  | down    | 1.00 | 0.97 | NA   | 1.04  | 0.88 | NA   | 0.59  | NP_005830 | TASPPPPKR                                  | 2 |
| 10250 SRRM1   | serine/arginine repetitive matrix 1                                   | WT   | HRG | down    | 1.00 | 0.60 | 0.62 | 0.65  | 0.42 | 0.49 | 0.50  | NP_005830 | HRSPSPATPPPK                               | 2 |
| 10250 SRRM1   | serine/arginine repetitive matrix 1                                   | WT   | HRG | down    | 1.00 | NA   | 0.51 | 0.65  | NA   | 0.35 | 0.40  | NP_005830 | RLSPSASPPR                                 | 2 |
| 10250 SRRM1   | serine/arginine repetitive matrix 1                                   | WT   | HRG | down    | 1.00 | 1.37 | 0.68 | 0.67  | 1.20 | 0.39 | 0.50  | NP_005830 | RQSPSPSTRPIR                               | 2 |
| 10250 SRRM1   | serine/arginine repetitive matrix 1                                   | WT   | HRG | down    | 1.00 | 0.54 | 0.69 | NA    | 0.29 | 0.52 | NA    | NP_005830 | RYSPPIQR                                   | 1 |
| 10250 SRRM1   | serine/arginine repetitive matrix 1                                   | WT   | HRG | down    | 1.00 | NA   | NA   | 0.73  | NA   | NA   | 0.64  | NP_005830 | RYSPSPPPK                                  | 2 |
| 10250 SRRM1   | serine/arginine repetitive matrix 1                                   | WT   | HRG | down    | 1.00 | NA   | 0.51 | 0.66  | NA   | 0.42 | 0.65  | NP_005830 | RYSPSPPPKR                                 | 2 |
| 10250 SRRM1   | serine/arginine repetitive matrix 1                                   | TamR | E2  | down    | 1.00 | 0.83 | 0.67 | 0.81  | 0.68 | 0.47 | 0.68  | NP_005830 | HRSPSPATPPPK                               | 2 |
| 10250 SRRM1   | serine/arginine repetitive matrix 1                                   | TamR | E2  | down    | 1.00 | 0.58 | NA   | 0.63  | 0.26 | NA   | 0.23  | NP_005830 | RQSPSPSTRPIR                               | 2 |
| 10250 SRRM1   | serine/arginine repetitive matrix 1                                   | TamR | E2  | down    | 1.00 | 0.55 | NA   | NA    | 0.31 | NA   | NA    | NP_005830 | RRSPSPAPPPR                                | 2 |
| 10250 SRRM1   | serine/arginine repetitive matrix 1                                   | TamR | E2  | down    | 1.00 | 0.53 | NA   | NA    | 0.33 | NA   | NA    | NP_005830 | RRSPSPPPTR                                 | 2 |
| 10250 SRRM1   | serine/arginine repetitive matrix 1                                   | TamR | E2  | down    | 1.00 | 0.68 | NA   | NA    | 0.40 | NA   | NA    | NP_005830 | RRTASPPPPK                                 | 2 |
| 10250 SRRM1   | serine/arginine repetitive matrix 1                                   | TamR | E2  | down    | 1.00 | NA   | 0.96 | 0.94  | NA   | 0.63 | 0.54  | NP_005830 | RYSPPIQR                                   | 1 |
| 10250 SRRM1   | serine/arginine repetitive matrix 1                                   | TamR | HRG | down    | 1.00 | 0.52 | 0.73 | 0.78  | 0.28 | 0.49 | 0.59  | NP_005830 | HRSPSPATPPPK                               | 2 |
| 10250 SRRM1   | serine/arginine repetitive matrix 1                                   | TamR | HRG | down    | 1.00 | 0.66 | 0.79 | 0.65  | 0.43 | 0.46 | 0.44  | NP_005830 | RQSPSPSTRPIR                               | 2 |
| 10250 SRRM1   | serine/arginine repetitive matrix 1                                   | TamR | HRG | down    | 1.00 | NA   | 0.54 | NA    | NA   | 0.27 | NA    | NP_005830 | RRASPPPPKR                                 | 2 |
| 10250 SRRM1   | serine/arginine repetitive matrix 1                                   | TamR | HRG | down    | 1.00 | 0.67 | 0.61 | NA    | 0.41 | 0.27 | NA    | NP_005830 | RRSPSPAPPPR                                | 2 |
| 10250 SRRM1   | serine/arginine repetitive matrix 1                                   | TamR | HRG | down    | 1.00 | 0.96 | 0.78 | 0.85  | 0.60 | 0.48 | 0.63  | NP_005830 | RRSPSPPPTR                                 | 2 |
| 10250 SRRM1   | serine/arginine repetitive matrix 1                                   | TamR | HRG | down    | 1.00 | 0.97 | 0.80 | NA    | 0.64 | 0.44 | NA    | NP_005830 | RRTASPPPPK                                 | 2 |
| 10250 SRRM1   | serine/arginine repetitive matrix 1                                   | TamR | HRG | down    | 1.00 | 0.72 | 0.75 | 0.85  | 0.60 | 0.52 | 0.65  | NP_005830 | TASPPPPKR                                  | 2 |
| 23524 SRRM2   | splicing coactivator subunit SRm300                                   | WT   | E2  | down    | 1.00 | 0.78 | 0.48 | 0.57  | 0.70 | 0.36 | 0.30  | NP_057417 | ARSRTPPSAPSQSR                             | 2 |
| 23524 SRRM2   | splicing coactivator subunit SRm300                                   | WT   | E2  | down    | 1.00 | NA   | 0.36 | NA    | NA   | 0.25 | NA    | NP_057417 | DRSPPKSPEKLQSSSESSPPSPQPTK                 | 3 |
| 23524 SRRM2   | splicing coactivator subunit SRm300                                   | WT   | E2  | down    | 1.00 | NA   | 0.75 | 0.99  | NA   | 0.63 | 0.67  | NP_057417 | HASSSPSPKAPAPGSHR                          | 2 |
| 23524 SRRM2   | splicing coactivator subunit SRm300                                   | WT   | E2  | down    | 1.00 | 0.85 | 0.43 | 0.31  | 0.80 | 0.34 | 0.16  | NP_057417 | MSCFRRSPMSPTPLDR                           | 2 |
| 23524 SRRM2   | splicing coactivator subunit SRm300                                   | WT   | E2  | down    | 1.00 | NA   | 0.48 | 0.76  | NA   | 0.36 | 0.77  | NP_057417 | NHSGSRTPPVALN SSR                          | 2 |
| 23524 SRRM2   | splicing coactivator subunit SRm300                                   | WT   | E2  | down    | 1.00 | NA   | NA   | 0.62  | NA   | NA   | 0.35  | NP_057417 | NHSGSRTPPVALN SSR                          | 3 |
| 23524 SRRM2   | splicing coactivator subunit SRm300                                   | WT   | E2  | down    | 1.00 | NA   | 0.62 | 0.86  | NA   | 0.39 | 0.59  | NP_057417 | SGTPPRQGSITSPOANEQSVTPQRR                  | 3 |
| 23524 SRRM2   | splicing coactivator subunit SRm300                                   | WT   | E2  | down    | 1.00 | 0.75 | NA   | 0.81  | 0.71 | NA   | 0.54  | NP_057417 | SRTPLLR                                    | 2 |
| 23524 SRRM2   | splicing coactivator subunit SRm300                                   | WT   | E2  | down    | 1.00 | 0.83 | NA   | 0.72  | 0.82 | NA   | 0.42  | NP_057417 | SRTSPAPWK                                  | 2 |
| 23524 SRRM2   | splicing coactivator subunit SRm300                                   | WT   | E2  | down    | 1.00 | NA   | 0.72 | 0.78  | NA   | 0.62 | 0.48  | NP_057417 | THTTALAGRSPPASGR                           | 2 |
| 23524 SRRM2   | splicing coactivator subunit SRm300                                   | WT   | HRG | down    | 1.00 | NA   | 0.56 | NA    | NA   | 0.42 | NA    | NP_057417 | ARSRTPPSAPSQSR                             | 2 |
| 23524 SRRM2   | splicing coactivator subunit SRm300                                   | WT   | HRG | down    | 1.00 | 0.44 | NA   | NA    | 0.35 | NA   | NA    | NP_057417 | MSCFRRSPMSPTPLDR                           | 2 |
| 23524 SRRM2   | splicing coactivator subunit SRm300                                   | WT   | HRG | down    | 1.00 | 0.71 | 0.72 | NA    | 0.52 | 0.64 | NA    | NP_057417 | NHSGSRTPPVALN SSR                          | 2 |
| 23524 SRRM2   | splicing coactivator subunit SRm300                                   | WT   | HRG | down    | 1.00 | NA   | 0.60 | 0.67  | NA   | 0.49 | 0.49  | NP_057417 | NHSGSRTPPVALN SSR                          | 3 |
| 23524 SRRM2   | splicing coactivator subunit SRm300                                   | WT   | HRG | down    | 1.00 | NA   | NA   | 0.69  | NA   | NA   | 0.55  | NP_057417 | SRTPLLR                                    | 2 |
| 23524 SRRM2   | splicing coactivator subunit SRm300                                   | WT   | HRG | down    | 1.00 | NA   | NA   | 0.70  | NA   | NA   | 0.44  | NP_057417 | SRTPPSAPSQSR                               | 2 |
| 23524 SRRM2   | splicing coactivator subunit SRm300                                   | WT   | HRG | down    | 1.00 | 0.84 | 0.74 | 0.83  | 0.74 | 0.66 | 0.69  | NP_057417 | THTTALAGRSPPASGR                           | 2 |
| 23524 SRRM2   | splicing coactivator subunit SRm300                                   | TamR | E2  | down    | 1.00 | NA   | 0.50 | 0.87  | NA   | 0.28 | 0.75  | NP_057417 | ARSRTPPSAPSQSR                             | 2 |
| 23524 SRRM2   | splicing coactivator subunit SRm300                                   | TamR | E2  | down    | 1.00 | 1.45 | 1.11 | 1.06  | 0.50 | 0.76 | 0.86  | NP_057417 | HASSSPSPKAPAPGSHR                          | 2 |
| 23524 SRRM2   | splicing coactivator subunit SRm300                                   | TamR | E2  | down    | 1.00 | NA   | 0.91 | 0.68  | NA   | 0.60 | 0.50  | NP_057417 | NHSGSRTPPVALN SSR                          | 3 |
| 23524 SRRM2   | splicing coactivator subunit SRm300                                   | TamR | E2  | down    | 1.00 | 0.74 | 0.89 | 0.98  | 0.48 | 0.58 | 0.93  | NP_057417 | THTTALAGRSPPASGR                           | 2 |
| 23524 SRRM2   | splicing coactivator subunit SRm300                                   | TamR | HRG | down    | 1.00 | 0.68 | NA   | 0.90  | 0.34 | NA   | 0.62  | NP_057417 | ARSRTPPSAPSQSR                             | 2 |
| 23524 SRRM2   | splicing coactivator subunit SRm300                                   | TamR | HRG | down    | 1.00 | NA   | NA   | 0.93  | NA   | NA   | 0.65  | NP_057417 | SRSSSPVTELASR                              | 3 |
| 23524 SRRM2   | splicing coactivator subunit SRm300                                   | TamR | HRG | down    | 1.00 | NA   | 0.68 | 0.87  | NA   | 0.44 | 0.68  | NP_057417 | THTTALAGRSPPASGR                           | 2 |
| 10809 STARD10 | START domain containing 10                                            | WT   | HRG | up      | 1.00 | NA   | 0.88 | NA    | NA   | 1.62 | NA    | NP_006636 | HLPHFKPWLHQEQSPLSLALSLSLVQHADSLNIDESAVAESR | 1 |
| 3925 STMN1    | stathmin 1                                                            | WT   | HRG | up      | 1.00 | 2.35 | 4.89 | NA    | 3.02 | 9.86 | NA    | NP_005554 | ASGQAFELILSPR                              | 1 |
| 3925 STMN1    | stathmin 1                                                            | TamR | HRG | up      | 1.00 | NA   | NA   | 7.27  | NA   | NA   | 5.71  | NP_005554 | ASGQAFELILSPR                              | 1 |
| 3925 STMN1    | stathmin 1                                                            | TamR | HRG | up      | 1.00 | NA   | NA   | 4.44  | NA   | NA   | 10.11 | NP_005554 | ASGQAFELILSPR                              | 2 |
| 3925 STMN1    | stathmin 1                                                            | TamR | HRG | up      | 1.00 | NA   | NA   | 18.80 | NA   | NA   | 46.68 | NP_005554 | RASGQAFELILSPR                             | 2 |
| 64426 SUDS3   | suppressor of defective silencing 3                                   | WT   | E2  | down    | 1.00 | 0.53 | 0.39 | 0.60  | 0.39 | 0.35 | 0.33  | NP_071936 | RPASPPSPEHLPATPAESPAQR                     | 2 |
| 64426 SUDS3   | suppressor of defective silencing 3                                   | WT   | HRG | down    | 1.00 | 0.50 | 0.54 | 0.68  | 0.29 | 0.49 | 0.55  | NP_071936 | RPASPPSPEHLPATPAESPAQR                     | 2 |
| 64426 SUDS3   | suppressor of defective silencing 3                                   | TamR | E2  | down    | 1.00 | 0.57 | 0.67 | 0.43  | 0.35 | 0.42 | 0.21  | NP_071936 | RPASPPSPEHLPATPAESPAQR                     | 2 |
| 64426 SUDS3   | suppressor of defective silencing 3                                   | TamR | HRG | up,down | 1.00 | NA   | 0.58 | 1.16  | NA   | 0.33 | 1.53  | NP_071936 | RPASPPSPEHLPATPAESPAQR                     | 2 |
| 54843 SYTL2   | synaptotagmin-like 2 isoform a                                        | WT   | HRG | up      | 1.00 | NA   | 2.68 | NA    | NA   | 6.86 | NA    | NP_116561 | FSAVKDELQPSGLIHGR                          | 1 |
| 54843 SYTL2   | synaptotagmin-like 2 isoform a                                        | WT   | HRG | up      | 1.00 | NA   | 0.68 | NA    | NA   | 3.71 | NA    | NP_116561 | IVSPGLTIHER                                | 1 |
| 26115 TANC2   | tetratricopeptide repeat, ankyrin repeat and coiled-coil containing 2 | WT   | E2  | down    | 1.00 | NA   | 0.44 | NA    | NA   | 0.49 | NA    | NP_079461 | EYSPPPPSPLLR                               | 2 |
| 9779 TBC1D5   | TBC1 domain family, member 5 isoform b                                | WT   | HRG | down    | 1.00 | 0.62 | NA   | NA    | 0.11 | NA   | NA    | NP_055559 | TSSTLDSEGTFNYSR                            | 5 |
| 1155 TBCB     | cytoskeleton associated protein 1                                     | WT   | E2  | up      | 1.00 | 2.11 | NA   | NA    | 1.09 | NA   | NA    | NP_001272 | EVTGVSAPTVTFVSISSLNTFRSEK                  | 5 |
| 9967 THRAP3   | thyroid hormone receptor associated protein 3                         | WT   | E2  | down    | 1.00 | 0.76 | 0.40 | 0.61  | 0.72 | 0.28 | 0.33  | NP_005110 | ERSPALKSPLQSVVVR                           | 2 |
| 9967 THRAP3   | thyroid hormone receptor associated protein 3                         | WT   | E2  | down    | 1.00 | 0.77 | 0.52 | 0.75  | 0.70 | 0.34 | 0.46  | NP_005110 | IDISPSTR                                   | 1 |
| 9967 THRAP3   | thyroid hormone receptor associated protein 3                         | WT   | HRG | up      | 1.00 | NA   | 0.73 | 1.01  | NA   | 6.63 | 3.92  | NP_005110 | ERSPALKSPLQSVVVR                           | 2 |
| 9967 THRAP3   | thyroid hormone receptor associated protein 3                         | WT   | HRG | down    | 1.00 | 0.79 | 0.70 | 0.77  | 0.70 | 0.56 | 0.54  | NP_005110 | IDISPSTR                                   | 1 |
| 9967 THRAP3   | thyroid hormone receptor associated protein 3                         | WT   | HRG | down    | 1.00 | 0.75 | NA   | NA    | 0.49 | NA   | NA    | NP_005110 | RIDISPSTR                                  | 1 |
| 9967 THRAP3   | thyroid hormone receptor associated protein 3                         | TamR | E2  | down    | 1.00 | 0.54 | 0.85 | NA    | 0.38 | 0.66 | NA    | NP_005110 | ERSPALKSPLQSVVVR                           | 2 |
| 9967 THRAP3   | thyroid hormone receptor associated protein 3                         | TamR | HRG | up      | 1.00 | NA   | 1.07 | 2.09  | NA   | 3.60 | 5.02  | NP_005110 | ERSPALKSPLQSVVVR                           | 2 |
| 7082 TJP1     | tight junction protein 1 isoform b                                    | WT   | E2  | down    | 1.00 | NA   | NA   | 0.60  | NA   | NA   | 0.25  | NP_783297 | VOIPVSRPDPPEVSDNEEDSYDEIHDPR               | 2 |
| 7082 TJP1     | tight junction protein 1 isoform b                                    | WT   | HRG | down    | 1.00 | NA   | 0.65 | 0.79  | NA   | 0.42 | 0.54  | NP_783297 | VOIPVSRPDPPEVSDNEEDSYDEIHDPR               | 2 |
| 7112 TMPO     | thymopoietin isoform alpha                                            | WT   | E2  | down    | 1.00 | 0.76 | 0.45 | 0.54  | 0.45 | 0.27 | 0.26  | NP_003267 | GPPDFSSDEEREPTVLGSGAAAAAGR                 | 2 |
| 7112 TMPO     | thymopoietin isoform alpha                                            | WT   | HRG | down    | 1.00 | 0.54 | 0.94 | 0.78  | 0.45 | 0.41 | 0.40  | NP_003267 | GPPDFSSDEEREPTVLGSGAAAAAGR                 | 2 |
| 7112 TMPO     | thymopoietin isoform alpha                                            | TamR | E2  | up,down | 1.00 | 2.74 | 1.43 | 1.26  | 0.72 | 0.40 | 0.50  | NP_003267 | GPPDFSSDEEREPTVLGSGAAAAAGR                 | 2 |

|        |         |                                                                  |      |     |         |      |      |      |      |      |       |      |           |                                |   |
|--------|---------|------------------------------------------------------------------|------|-----|---------|------|------|------|------|------|-------|------|-----------|--------------------------------|---|
| 7112   | TMPO    | thymopietin isoform alpha                                        | TamR | HRG | up      | 1.00 | NA   | 1.70 | 1.38 | NA   | 0.96  | 1.35 | NP_003267 | GPPDFSSDEEREPTVLGSGAAAAGR      | 2 |
| 7112   | TMPO    | thymopietin isoform alpha                                        | TamR | HRG | down    | 1.00 | NA   | NA   | 1.15 | NA   | NA    | 0.18 | NP_003267 | SSTPLTISSAENTR                 | 2 |
| 8711   | TNK1    | tyrosine kinase, non-receptor, 1                                 | WT   | E2  | down    | 1.00 | NA   | 0.64 | 0.97 | NA   | 0.46  | 0.71 | NP_003976 | SLESVLSLGRPTGGGSSPPEIR         | 2 |
| 7155   | TOP2B   | DNA topoisomerase II, beta isozyme                               | WT   | E2  | down    | 1.00 | NA   | 0.45 | 0.60 | NA   | 0.32  | 0.44 | NP_001059 | KTSFDQSDVDIFPSPDFTEPPSLPR      | 1 |
| 7155   | TOP2B   | DNA topoisomerase II, beta isozyme                               | WT   | HRG | down    | 1.00 | NA   | 0.81 | NA   | NA   | 0.60  | NA   | NP_001059 | KTSFDQSDVDIFPSPDFTEPPSLPR      | 1 |
| 7155   | TOP2B   | DNA topoisomerase II, beta isozyme                               | TamR | E2  | up      | 1.00 | NA   | NA   | 1.09 | NA   | NA    | 1.52 | NP_001059 | TSFDQSDVDIFPSPDFTEPPSLPR       | 1 |
| 7164   | TPD52L1 | tumor protein D52-like 1 isoform 1                               | WT   | E2  | down    | 1.00 | 0.96 | 0.53 | 0.73 | 0.60 | 0.20  | 0.19 | NP_003278 | NSPTFKSFEER                    | 1 |
| 7164   | TPD52L1 | tumor protein D52-like 1 isoform 1                               | WT   | HRG | down    | 1.00 | 0.90 | NA   | NA   | 0.61 | NA    | NA   | NP_003278 | NSPTFKSFEERVETTIVTSLK          | 1 |
| 7164   | TPD52L1 | tumor protein D52-like 1 isoform 1                               | TamR | E2  | down    | 1.00 | NA   | 0.95 | NA   | NA   | 0.57  | NA   | NP_003278 | NSPTFKSFEER                    | 1 |
| 7164   | TPD52L1 | tumor protein D52-like 1 isoform 1                               | TamR | HRG | down    | 1.00 | NA   | 0.87 | NA   | NA   | 0.52  | NA   | NP_003278 | NSPTFKSFEER                    | 1 |
| 7165   | TPD52L2 | tumor protein D52-like 2 isoform e                               | WT   | E2  | down    | 1.00 | 0.91 | 0.55 | 0.68 | 0.49 | 0.26  | 0.18 | NP_003279 | NSATFKSFEDR                    | 1 |
| 7165   | TPD52L2 | tumor protein D52-like 2 isoform e                               | TamR | E2  | down    | 1.00 | 0.63 | 0.84 | NA   | 0.65 | 0.39  | NA   | NP_003279 | NSATFKSFEDR                    | 1 |
| 29896  | TRA2A   | transformer-2 alpha                                              | WT   | E2  | down    | 1.00 | NA   | NA   | 0.64 | NA   | NA    | 0.32 | NP_037425 | RSPSPYYSR                      | 2 |
| 29896  | TRA2A   | transformer-2 alpha                                              | WT   | HRG | down    | 1.00 | NA   | NA   | 0.71 | NA   | NA    | 0.58 | NP_037425 | RSPSPYYSR                      | 2 |
| 7410   | VAV2    | vav 2 guanine nucleotide exchange factor isoform 2               | WT   | E2  | down    | 1.00 | 0.87 | NA   | 0.65 | 0.60 | NA    | 0.35 | NP_003362 | ASSRSPVFTPR                    | 2 |
| 51322  | WAC     | WW domain-containing adapter with a coiled-coil region isoform 3 | WT   | HRG | down    | 1.00 | NA   | 0.69 | NA   | NA   | 0.64  | NA   | NP_567823 | SPSPGNHTSNSSNASNAVVPQNSSAR     | 2 |
| 23063  | WAPAL   | wings apart-like homolog                                         | WT   | E2  | down    | 1.00 | NA   | 0.34 | 0.94 | NA   | 0.35  | 0.97 | NP_055860 | RPEPSEISPIKGSVR                | 2 |
| 51729  | WBP11   | WW domain binding protein 11                                     | WT   | E2  | down    | 1.00 | NA   | NA   | 0.54 | NA   | NA    | 0.31 | NP_057396 | RRDEDMLYSPELAQR                | 1 |
| 147179 | WIPF2   | WIRE protein                                                     | WT   | HRG | down    | 1.00 | NA   | NA   | 0.82 | NA   | NA    | 0.40 | NP_573571 | PIPPPPPPPPGPPPPPTFHQANTEQPKLSR | 1 |
| 7498   | XDH     | xanthine dehydrogenase                                           | WT   | HRG | up      | 1.00 | NA   | NA   | 1.11 | NA   | NA    | 2.81 | NP_000370 | STVVSTAVALAAYKTGRPVRCMLDR      | 2 |
| 10730  | YME1L1  | YME1-like 1 isoform 3                                            | WT   | HRG | down    | 1.00 | 0.15 | NA   | NA   | 0.15 | NA    | NA   | NP_055078 | LGVMYSDTGKLSPETQSAIEQEUR       | 2 |
| 23091  | ZC3H13  | zinc finger CCH-type containing 13                               | WT   | E2  | down    | 1.00 | NA   | NA   | 0.79 | NA   | NA    | 0.56 | NP_055885 | GPRTSPPPPPIEDIALGK             | 2 |
| 23091  | ZC3H13  | zinc finger CCH-type containing 13                               | WT   | E2  | down    | 1.00 | NA   | NA   | 0.92 | NA   | NA    | 0.39 | NP_055885 | HHSSSSQSGSSIQRHSPPSR           | 2 |
| 23091  | ZC3H13  | zinc finger CCH-type containing 13                               | WT   | E2  | down    | 1.00 | NA   | NA   | 0.81 | NA   | NA    | 0.40 | NP_055885 | SKLSPSPSLR                     | 2 |
| 23091  | ZC3H13  | zinc finger CCH-type containing 13                               | WT   | HRG | down    | 1.00 | NA   | NA   | 0.43 | NA   | NA    | 0.52 | NP_055885 | SASPYPSHSLSSPQR                | 3 |
| 23091  | ZC3H13  | zinc finger CCH-type containing 13                               | TamR | HRG | down    | 1.00 | NA   | 0.80 | NA   | NA   | 0.54  | NA   | NP_055885 | STSPAGQHHSPISR                 | 2 |
| 80829  | ZFP91   | zinc finger protein 91                                           | WT   | HRG | up,down | 1.00 | NA   | 0.63 | NA   | NA   | 11.85 | NA   | NP_444251 | RRSSPSARPPDVPGQQPQAAK          | 2 |
| 137209 | ZNF572  | zinc finger protein 572                                          | WT   | HRG | up      | 1.00 | NA   | 0.80 | NA   | NA   | 4.30  | NA   | NP_689625 | RFSSSSLIQHHR                   | 2 |
| 57507  | ZNF608  | zinc finger protein 608                                          | WT   | E2  | up      | 1.00 | NA   | 6.72 | NA   | NA   | 1.68  | NA   | NP_065798 | AVSPVLMHSYPGAYLSPGFHYVPVYKMSGR | 6 |
| 283489 | ZNF828  | zinc finger protein 828                                          | WT   | E2  | up,down | 1.00 | NA   | 0.52 | 1.79 | NA   | 0.53  | 0.85 | NP_115812 | KPSGSPDLWKLSPDQR               | 2 |
