# Supplementary material
Source: PubMed Central journal article supplement (PMC3013041)
Supplement: supp_M110.156877_jbc.M110.156877-4.pdf [file supp_M110.156877_jbc.M110.156877-4.pdf]

**A : Motif score for E2-stimulated gene expression time course**

| DB           | Motif name                               | WT:E2 |      |      |      |      |      |      | TamR:E2 |      |      |       |      |      |      | Difference (TamR - WT) |      |      |       |       |      |      |
|--------------|------------------------------------------|-------|------|------|------|------|------|------|---------|------|------|-------|------|------|------|------------------------|------|------|-------|-------|------|------|
|              |                                          | 1h    | 2h   | 3h   | 6h   | 12h  | 24h  | 48h  | 1h      | 2h   | 3h   | 6h    | 12h  | 24h  | 48h  | 1h                     | 2h   | 3h   | 6h    | 12h   | 24h  | 48h  |
| SwissRegulon | ATF5,CREB3:22809,10488                   | -4.0  | -2.5 | -1.7 | -3.8 | -5.6 | -1.9 | -1.8 | 4.9     | 6.0  | 5.6  | 4.8   | 3.1  | 3.6  | 1.3  | 8.9                    | 8.5  | 7.3  | 8.6   | 8.6   | 5.5  | 3.1  |
|              | CREB1:1385                               | -3.3  | -1.8 | -1.3 | -2.8 | -5.1 | -1.3 | -2.4 | 5.0     | 5.7  | 5.2  | 4.9   | 2.4  | 3.2  | 0.3  | 8.4                    | 7.6  | 6.5  | 7.7   | 7.5   | 4.5  | 2.7  |
|              | E2F1-5:1874,1875,1870,1869,1871          | -0.3  | -1.1 | -0.3 | -1.6 | 0.3  | 6.2  | 5.1  | 2.3     | 2.4  | 0.8  | 2.5   | 3.9  | 7.0  | 8.4  | 2.6                    | 3.5  | 1.1  | 4.1   | 3.6   | 0.8  | 3.4  |
|              | ELF1,2,4:1998,1997,200C                  | -4.7  | -2.2 | 0.4  | -3.1 | -6.4 | -1.0 | -0.9 | 7.9     | 7.6  | 9.8  | 8.7   | 4.4  | 4.8  | 1.9  | 12.6                   | 9.7  | 9.3  | 11.8  | 10.8  | 5.8  | 2.8  |
|              | ELK1,4_GABPA,B2:2551,2553,2005,2002      | -7.9  | -4.4 | -0.6 | -4.5 | -9.1 | -1.8 | -1.3 | 10.7    | 11.7 | 13.1 | 11.9  | 6.3  | 6.9  | 2.2  | 18.7                   | 16.1 | 13.7 | 16.4  | 15.4  | 8.8  | 3.5  |
|              | FOS,B,L1_JUNB,D:2353,3726,8061,3727,2354 | 3.6   | 2.0  | 1.1  | 0.3  | 2.2  | 1.5  | 2.1  | -1.7    | -3.3 | -3.7 | -4.7  | -4.7 | -4.9 | -3.0 | -5.3                   | -5.2 | -4.7 | -5.0  | -6.9  | -6.3 | -5.1 |
|              | FOXF1,2_FOXJ1:2295,2302,2294             | -0.6  | -0.1 | -2.6 | -1.5 | 1.1  | -1.7 | 0.5  | -2.6    | -4.3 | -4.9 | -4.8  | -4.2 | -4.7 | -3.2 | -2.1                   | -4.3 | -2.3 | -3.3  | -5.3  | -3.1 | -3.7 |
|              | FOXO1A,3A_MLLT7:2308,4303,230E           | 0.8   | 0.3  | -1.2 | -0.6 | 1.5  | -0.6 | 0.6  | -1.6    | -1.6 | -3.0 | -2.6  | -4.5 | -4.4 | -5.2 | -2.4                   | -2.0 | -1.8 | -2.0  | -6.0  | -3.8 | -5.8 |
|              | GATA4:2626                               | 3.9   | 2.6  | 0.2  | 3.2  | 5.3  | 0.9  | 2.7  | -4.6    | -6.3 | -5.6 | -5.0  | -2.5 | -3.7 | -1.2 | -8.4                   | -8.9 | -5.8 | -8.3  | -7.8  | -4.7 | -3.9 |
|              | JUN,B,D:3725,3727,3726                   | -1.5  | -0.7 | 0.0  | -0.6 | -1.7 | -1.1 | -0.7 | 1.9     | 3.7  | 2.8  | 2.4   | 1.8  | 2.1  | 0.5  | 3.4                    | 4.4  | 2.8  | 3.0   | 3.5   | 3.2  | 1.2  |
|              | LMO2:4005                                | 3.3   | 1.0  | 0.1  | 2.1  | 2.6  | 1.5  | 0.9  | 0.1     | -1.5 | -1.8 | -3.0  | -4.1 | -3.8 | -3.3 | -3.2                   | -2.5 | -1.9 | -5.1  | -6.8  | -5.3 | -4.2 |
|              | MAZ:4150                                 | 4.6   | 1.7  | 0.8  | 3.6  | 5.0  | 4.4  | 2.5  | -2.2    | -4.1 | -5.1 | -5.3  | -3.3 | -4.5 | -4.5 | -6.8                   | -5.8 | -5.9 | -9.0  | -8.3  | -8.9 | -7.0 |
|              | MEF2A,B,C,D:4205,4208,4209,4207          | 3.6   | 1.0  | 0.2  | 2.0  | 3.8  | 1.7  | 2.3  | -2.9    | -2.7 | -4.5 | -4.5  | -3.4 | -4.8 | -2.0 | -6.5                   | -3.7 | -4.7 | -6.5  | -7.1  | -6.5 | -4.3 |
|              | MEF2A,C,D:4208,4205,420E                 | 0.5   | -1.4 | -2.2 | -0.7 | 1.9  | -0.4 | 1.5  | -1.3    | -3.1 | -4.4 | -4.1  | -4.8 | -3.8 | -3.5 | -1.8                   | -1.7 | -2.2 | -3.4  | -6.7  | -3.4 | -4.9 |
|              | NFYA,B,C:4802,4801,480C                  | -4.7  | -3.5 | 0.5  | -1.6 | -3.0 | 2.5  | 2.7  | 2.8     | 5.9  | 4.7  | 7.0   | 6.4  | 6.7  | 10.1 | 7.5                    | 9.4  | 4.2  | 8.6   | 9.3   | 4.2  | 7.4  |
|              | NRF1:4899                                | -5.8  | -2.1 | 0.6  | -3.3 | -5.9 | 1.8  | 0.7  | 10.7    | 10.9 | 12.8 | 14.1  | 9.2  | 9.3  | 7.0  | 16.5                   | 13.0 | 12.1 | 17.5  | 15.1  | 7.5  | 6.4  |
|              | POU3F1-4:5454,5455,5453,545E             | 3.0   | 2.3  | -0.3 | 1.9  | 3.0  | 1.1  | 1.4  | -1.5    | -3.8 | -3.4 | -3.3  | -1.9 | -1.7 | -1.9 | -4.5                   | -6.1 | -3.0 | -5.3  | -5.0  | -2.8 | -3.3 |
|              | RUNX1-3:861,864,860                      | 3.0   | 1.5  | 1.2  | 1.4  | 1.6  | 1.1  | 2.1  | -2.0    | -3.8 | -3.0 | -4.1  | -2.9 | -3.6 | -1.5 | -5.0                   | -5.3 | -4.2 | -5.5  | -4.6  | -4.7 | -3.6 |
|              | SNAI1-3:6591,6615,33392E                 | 3.7   | 1.9  | 0.4  | 2.0  | 2.3  | 0.5  | 1.1  | -3.2    | -4.1 | -5.1 | -5.3  | -6.2 | -6.3 | -5.5 | -6.9                   | -6.0 | -5.5 | -7.2  | -8.5  | -6.8 | -6.7 |
|              | SREBF1,2:6720,6721                       | -1.7  | -0.1 | -0.9 | -2.0 | -2.1 | -0.2 | 1.2  | 0.3     | 0.3  | 0.3  | -0.3  | -3.6 | -3.7 | -4.1 | 2.0                    | 0.3  | 1.2  | 1.7   | -1.4  | -3.5 | -5.3 |
|              | SRF:6722                                 | 2.3   | 0.7  | -0.8 | 0.5  | 2.2  | 1.5  | 1.6  | -4.4    | -4.2 | -5.4 | -5.4  | -4.9 | -5.6 | -3.6 | -6.7                   | -4.9 | 4.6  | -5.9  | -7.1  | -7.1 | -5.2 |
|              | STAT1,3:6772,6774                        | -2.8  | -1.0 | -0.1 | -1.6 | -3.3 | -2.0 | -1.7 | 2.5     | 3.2  | 3.3  | 3.0   | -0.6 | 0.6  | -1.5 | 5.2                    | 4.3  | 3.5  | 4.7   | 2.7   | 2.6  | 0.2  |
|              | TBP:6908                                 | 2.0   | -0.9 | -3.0 | 0.6  | 2.3  | -0.4 | 3.3  | -7.3    | -6.6 | -9.0 | -10.8 | -7.4 | -8.7 | -2.5 | -9.3                   | -5.7 | -6.0 | -11.4 | -9.7  | -8.3 | -5.8 |
|              | TCF1:6927                                | 3.0   | 0.8  | -0.6 | 0.2  | 3.1  | 1.1  | 2.0  | -2.6    | -3.6 | -5.0 | -4.7  | -4.0 | -3.5 | -1.1 | -5.6                   | -4.5 | -4.4 | -4.9  | -7.1  | -4.6 | -3.2 |
|              | YY1:7528                                 | 0.5   | -1.2 | -0.4 | -1.8 | -1.8 | 0.5  | 0.9  | 3.6     | 2.8  | 2.7  | 3.6   | 3.5  | 4.4  | 1.5  | 3.0                    | 4.0  | 3.1  | 5.3   | 5.3   | 3.9  | 0.7  |
| ZNF143:7702  | -4.9                                     | -2.6  | -0.4 | -2.8 | -4.8 | -1.8 | -1.9 | 7.6  | 8.0     | 9.3  | 9.3  | 5.6   | 8.0  | 5.0  | 12.5 | 10.6                   | 9.7  | 12.1 | 10.3  | 9.8   | 6.9  |      |
| ZNF148:7707  | 3.7                                      | 1.0   | -0.1 | 3.1  | 2.5  | 1.5  | 0.9  | -0.6 | -2.8    | -2.7 | -4.9 | -3.6  | -3.6 | -3.3 | -4.3 | -3.8                   | -2.7 | -8.0 | -6.2  | -5.1  | -4.2 |      |
| ZNF238:10472 | 1.6                                      | 0.6   | -0.6 | 1.2  | 1.5  | -0.7 | 0.5  | -1.5 | -2.1    | -3.6 | -4.6 | -4.2  | -3.6 | -3.6 | -3.1 | -2.8                   | -3.0 | -5.8 | -5.7  | -2.9  | -4.1 |      |
| ZNF278:23598 | 5.2                                      | 2.2   | 0.8  | 5.2  | 5.5  | 4.8  | 3.0  | -1.7 | -4.2    | -4.6 | -4.5 | -3.8  | -5.1 | -3.9 | -6.9 | -6.4                   | -5.4 | -9.6 | -9.3  | -10.0 | -6.9 |      |
| ZNF42:7593   | 4.3                                      | 3.1   | 1.4  | 3.4  | 2.8  | 1.5  | 1.1  | 0.3  | -3.3    | -2.5 | -4.0 | -2.4  | -3.2 | -1.9 | -4.0 | -6.3                   | -3.9 | -7.3 | -5.2  | -4.7  | -2.9 |      |
| UCSC         | V\$AML1_01:861                           | 2.0   | 1.5  | 0.1  | 1.5  | 2.8  | 0.0  | 1.1  | -1.0    | -2.5 | -1.5 | -1.7  | -2.6 | -2.9 | -3.5 | -3.1                   | -3.9 | -1.7 | -3.2  | -5.4  | -3.0 | -4.6 |
|              | V\$AP1_01:2353,8061,3725,3726,3727       | 2.2   | 1.7  | -0.3 | 0.2  | 1.6  | 1.2  | 1.1  | -1.6    | -3.1 | -3.9 | -4.6  | -3.6 | -4.8 | -3.4 | -3.8                   | -4.8 | -3.6 | -4.8  | -5.3  | -6.0 | -4.5 |
|              | V\$E2F_02:1869,1870,1871,1874,187E       | -1.6  | -1.1 | -0.4 | -2.6 | -0.8 | 6.0  | 3.7  | 2.3     | 1.9  | 1.1  | 3.6   | 3.9  | 8.1  | 8.2  | 3.9                    | 3.0  | 1.5  | 6.2   | 4.7   | 2.1  | 4.4  |
|              | V\$ELK1_01:2002                          | -1.1  | -0.3 | 0.5  | -0.1 | -2.0 | -1.0 | -0.4 | 4.3     | 3.1  | 5.1  | 3.5   | 1.7  | 0.7  | -0.3 | 5.4                    | 3.3  | 4.6  | 3.7   | 3.7   | 1.7  | 0.1  |
|              | V\$ELK1_02:2002                          | -4.7  | -2.7 | 0.7  | -3.0 | -6.1 | -1.9 | -0.7 | 6.9     | 7.4  | 8.3  | 8.7   | 5.8  | 6.2  | 2.9  | 11.6                   | 10.1 | 7.6  | 11.7  | 11.9  | 8.1  | 3.6  |
|              | V\$FOXO4_01:4303                         | 0.6   | 0.4  | 0.4  | -0.5 | -0.6 | -0.1 | 1.5  | -0.2    | -0.4 | -1.2 | -0.8  | -2.8 | -3.3 | -1.7 | -0.8                   | -0.9 | -1.6 | -0.3  | -2.2  | -3.2 | -3.2 |
|              | V\$FREAC2_01:2295                        | 1.5   | 0.7  | 0.7  | 1.2  | 1.0  | 0.3  | 1.2  | -1.4    | -2.0 | -1.9 | -2.1  | -4.2 | -3.2 | -4.4 | -2.9                   | -2.7 | -2.6 | -3.3  | -5.2  | -3.4 | -5.6 |
|              | V\$HNF1_01:6927                          | 2.0   | 1.3  | 0.3  | 1.8  | 3.7  | 0.8  | 1.9  | -2.5    | -1.8 | -1.8 | -1.9  | -1.6 | -1.5 | -1.3 | -4.4                   | -3.0 | -2.2 | -3.7  | -5.3  | -2.3 | -3.2 |
|              | V\$LMO2COM_02:4005                       | 4.2   | 1.3  | 1.1  | 1.7  | 2.4  | 0.8  | 0.7  | -1.0    | -0.4 | -1.2 | -1.3  | -0.8 | 0.3  | 0.2  | -5.2                   | -1.7 | -2.3 | -3.1  | -3.2  | -0.4 | -0.5 |
|              | V\$MEF2_01:4205                          | 0.8   | -0.9 | -0.6 | -0.2 | 0.5  | -2.0 | -0.4 | -4.5    | -4.0 | -4.5 | -4.0  | -2.9 | -3.2 | -2.4 | -5.3                   | -3.1 | -3.9 | -3.8  | -3.4  | -1.2 | -2.0 |
|              | V\$MEF2_03:4205                          | 0.6   | 0.7  | 0.7  | 0.6  | 1.5  | 0.0  | 0.2  | -2.5    | -3.3 | -3.1 | -2.1  | -3.6 | -3.3 | -2.4 | -3.1                   | -4.0 | -3.8 | -2.7  | -5.2  | -3.3 | -2.7 |
|              | V\$MZF1_01:7593                          | 3.4   | 3.3  | 1.5  | 2.3  | 3.1  | 2.3  | 2.8  | -3.0    | -2.2 | -2.0 | -3.0  | -1.8 | -2.0 | -1.1 | -6.4                   | -5.5 | -3.5 | -5.3  | -4.9  | -4.3 | -3.9 |
|              | V\$NFY_C:4800,4801                       | 0.4   | 1.0  | 1.5  | 0.4  | 0.6  | 2.0  | 1.6  | 1.5     | 1.5  | 1.8  | 1.0   | 1.7  | 2.8  | 2.3  | 1.0                    | 0.6  | 0.3  | 0.5   | 1.1   | 0.8  | 0.7  |
|              | V\$NFY_Q6:4800,4801,4802                 | -2.4  | -2.7 | -0.5 | -0.8 | -0.2 | 1.7  | 2.0  | -0.1    | 1.1  | 0.2  | 2.3   | 2.0  | 2.1  | 4.9  | 2.3                    | 3.9  | 0.7  | 3.1   | 2.2   | 0.5  | 2.9  |
|              | V\$POU3F2_01:5454                        | 4.7   | 3.2  | 2.7  | 3.2  | 3.4  | 1.7  | 1.6  | -1.2    | -1.9 | -1.3 | -1.4  | 0.1  | -0.2 | 0.9  | -5.9                   | -5.2 | -4.1 | -4.7  | -3.3  | -1.9 | -0.7 |
|              | V\$RP58_01:10472                         | 2.0   | -0.8 | -1.0 | 0.3  | 2.0  | -0.2 | -0.8 | -3.3    | -2.7 | -4.2 | -4.3  | -2.7 | -2.9 | -1.9 | -5.4                   | -1.9 | -3.3 | -4.5  | -4.7  | -2.7 | -1.1 |

|                   |      |      |      |      |      |      |      |      |      |      |      |      |      |      |      |      |      |      |      |      |      |
|-------------------|------|------|------|------|------|------|------|------|------|------|------|------|------|------|------|------|------|------|------|------|------|
| V\$SREBP1_01:6720 | -0.9 | 0.1  | -0.5 | -1.6 | -2.2 | -0.2 | 0.8  | 0.3  | 0.3  | 0.2  | 0.3  | -3.2 | -2.7 | -3.5 | 1.2  | 0.2  | 0.7  | 1.9  | -1.1 | -2.5 | -4.3 |
| V\$SRF_01:6722    | 0.9  | -1.1 | -1.3 | -1.1 | 0.6  | 0.6  | 0.1  | -2.7 | -2.6 | -3.4 | -5.0 | -4.4 | -3.1 | -2.4 | -3.5 | -1.5 | -2.1 | -4.0 | -5.1 | -3.7 | -2.4 |
| V\$STAT3_01:6774  | -2.1 | -2.0 | -1.6 | -0.5 | -1.8 | -0.3 | -1.0 | 3.3  | 2.1  | 3.3  | 4.0  | 2.9  | 3.5  | 2.1  | 5.4  | 4.2  | 4.9  | 4.5  | 4.6  | 3.8  | 3.1  |
| V\$TATA_01:6908   | 3.5  | -0.7 | -0.3 | 1.7  | 2.5  | -0.5 | 1.9  | -5.8 | -5.4 | -7.2 | -7.5 | -3.7 | -5.5 | -1.8 | -9.3 | -4.7 | -6.9 | -9.2 | -6.1 | -5.0 | -3.6 |
| V\$TATA_C:6908    | 3.4  | 2.1  | 0.5  | 0.6  | 2.4  | 0.2  | 0.6  | -3.1 | -3.0 | -4.4 | -5.0 | -4.9 | -4.8 | -2.4 | -6.5 | -5.1 | -5.0 | -5.6 | -7.3 | -5.0 | -3.0 |
| V\$YY1_02:7528    | -1.8 | -0.4 | 0.6  | 0.1  | -1.9 | -0.2 | 1.7  | 4.1  | 3.6  | 5.6  | 5.6  | 5.8  | 4.5  | 4.1  | 5.9  | 4.0  | 4.9  | 5.5  | 7.7  | 4.7  | 2.4  |

**B : Motif score for HRG-stimulated gene expression time course**

| DB           | Motif name                               | WT:HRG |      |      |      |      |      | TamR:HRG |      |      |      |      |      | Difference (TamR - WT) |      |      |      |      |      |      |      |      |
|--------------|------------------------------------------|--------|------|------|------|------|------|----------|------|------|------|------|------|------------------------|------|------|------|------|------|------|------|------|
|              |                                          | 1h     | 2h   | 3h   | 6h   | 12h  | 24h  | 48h      | 1h   | 2h   | 3h   | 6h   | 12h  | 24h                    | 48h  | 1h   | 2h   | 3h   | 6h   | 12h  | 24h  | 48h  |
| SwissRegulon | ATF5,CREB3:22809,10488                   | -2.0   | 7.6  | 5.0  | -0.7 | 0.0  | 3.1  | 3.0      | 6.5  | 5.2  | 3.0  | 1.9  | 2.2  | 4.1                    | 6.2  | 8.5  | -2.3 | -2.0 | 2.6  | 2.2  | 1.0  | 3.2  |
|              | CREB1:1385                               | -2.4   | 5.5  | 2.8  | -1.1 | -0.4 | 2.2  | 2.5      | 5.1  | 3.4  | 1.2  | 0.6  | 0.9  | 2.3                    | 3.8  | 7.5  | -2.1 | -1.6 | 1.7  | 1.3  | 0.2  | 1.4  |
|              | E2F1-5:1874,1875,1870,1869,1871          | -3.0   | -1.4 | -3.5 | -4.6 | 1.4  | 4.0  | -4.0     | -3.5 | -4.5 | -6.0 | -5.8 | -0.9 | 3.3                    | 4.2  | -0.4 | -3.1 | -2.5 | -1.2 | -2.3 | -0.7 | 8.2  |
|              | ELF1,2,4:1998,1997,200C                  | -7.5   | 1.5  | -1.7 | -1.8 | 2.2  | 3.9  | 3.8      | -6.6 | -3.6 | -1.7 | 0.3  | 1.2  | 5.7                    | 10.1 | 0.9  | -5.1 | 0.0  | 2.1  | -0.9 | 1.7  | 6.3  |
|              | ELK1,4_GABPA,B2:2551,2553,2005,2002      | -11.8  | 2.1  | -2.0 | -4.2 | 0.7  | 3.8  | 2.9      | -7.8 | -4.6 | -2.9 | -0.9 | -0.3 | 5.7                    | 11.5 | 4.0  | -6.7 | -0.9 | 3.3  | -1.0 | 1.9  | 8.6  |
|              | FOS,B,L1_JUNB,D:2353,3726,8061,3727,2354 | 6.2    | 6.0  | 5.8  | 5.6  | 4.6  | 5.0  | 5.6      | 5.8  | 6.6  | 6.5  | 4.9  | 4.4  | 2.1                    | 1.7  | -0.4 | 0.6  | 0.7  | -0.7 | -0.3 | -2.9 | -3.9 |
|              | FOXF1,2_FOXJ1:2295,2302,2294             | 3.1    | -1.5 | -1.2 | -4.2 | -3.7 | 1.2  | 0.6      | 3.2  | 0.9  | -0.8 | -4.9 | -4.8 | -6.4                   | -3.0 | 0.1  | 2.4  | 0.4  | -0.7 | -1.1 | -7.5 | -3.6 |
|              | FOXO1A,3A_MLLT7:2308,4303,230C           | 2.2    | -3.3 | -2.2 | -6.8 | -6.3 | -1.3 | -0.6     | 2.1  | 0.0  | -1.6 | -5.9 | -6.8 | -9.3                   | -6.9 | 0.0  | 3.2  | 0.6  | 0.8  | -0.5 | -8.1 | -6.3 |
|              | GATA4:2626                               | 4.4    | -0.9 | -0.1 | -1.4 | -1.0 | -0.7 | 0.6      | 4.3  | 3.0  | 2.7  | -0.6 | -1.9 | -4.6                   | -2.5 | -0.1 | 3.9  | 2.8  | 0.8  | -0.9 | -3.9 | -3.1 |
|              | JUN,B,D:3725,3727,3726                   | 0.9    | 5.2  | 4.6  | 0.7  | -0.3 | 2.2  | 2.9      | 6.3  | 5.3  | 3.7  | 2.5  | 0.8  | 0.7                    | 2.1  | 5.4  | 0.1  | -0.9 | 1.8  | 1.1  | -1.5 | -0.8 |
|              | LMO2:4005                                | 2.1    | 0.3  | 2.4  | 0.5  | 0.0  | 0.5  | 2.3      | 2.0  | 2.4  | 3.3  | 3.4  | 1.2  | -1.2                   | -1.2 | -0.1 | 2.1  | 0.8  | 2.9  | 1.2  | -1.7 | -3.5 |
|              | MAZ:4150                                 | 4.0    | 4.0  | 4.9  | 2.7  | 2.1  | -0.9 | -0.7     | 6.5  | 3.5  | 1.0  | 1.4  | 0.0  | -2.5                   | -3.6 | 2.4  | -0.5 | -3.9 | -1.4 | -2.0 | -1.5 | -2.9 |
|              | MEF2A,B,C,D:4205,4208,4209,4207          | 5.8    | 2.7  | 1.5  | -0.2 | -1.1 | 0.3  | 2.3      | 6.3  | 4.5  | 2.8  | -0.5 | -1.9 | -3.9                   | -3.3 | 0.5  | 1.8  | 1.3  | -0.3 | -0.8 | -4.3 | -5.6 |
|              | MEF2A,C,D:4208,4205,420C                 | 3.1    | 1.5  | 2.4  | 0.1  | -1.2 | 2.0  | 4.1      | 5.2  | 4.4  | 3.7  | -0.1 | -1.0 | -3.2                   | -2.2 | 2.1  | 2.9  | 1.2  | -0.2 | 0.2  | -5.2 | -6.3 |
|              | NFYA,B,C:4802,4801,480C                  | -7.0   | -3.3 | -6.7 | -7.1 | -1.3 | -3.2 | -7.7     | -4.9 | -6.4 | -9.5 | -7.3 | -3.7 | 2.4                    | 6.7  | 2.2  | -3.0 | -2.8 | -0.2 | -2.4 | 5.6  | 14.5 |
|              | NRF1:4899                                | -11.7  | -2.4 | -5.1 | -5.0 | 0.0  | 2.3  | -1.7     | #### | -9.7 | -9.4 | -3.7 | -0.9 | 4.9                    | 7.4  | 1.4  | -7.3 | -4.4 | 1.4  | -0.9 | 2.6  | 9.2  |
|              | POU3F1-4:5454,5455,5453,545C             | 4.5    | 0.3  | 1.5  | 0.8  | -0.4 | 2.0  | 1.0      | 4.0  | 2.7  | 1.7  | 0.3  | -0.2 | -2.9                   | -2.6 | -0.5 | 2.4  | 0.3  | -0.6 | 0.2  | -4.8 | -3.6 |
|              | RUNX1-3:861,864,860                      | 1.8    | 0.5  | 0.7  | 1.1  | 0.3  | -0.9 | 0.6      | 0.9  | 0.0  | 0.2  | -1.0 | -1.0 | -2.5                   | -2.5 | -0.9 | -0.5 | -0.5 | -2.1 | -1.3 | -1.7 | -3.1 |
|              | SNAI1-3:6591,6615,33392C                 | 3.6    | 0.2  | 2.2  | 2.1  | 0.9  | 0.2  | 3.5      | 4.0  | 3.6  | 2.8  | 1.3  | 0.1  | -2.5                   | -2.2 | 0.4  | 3.5  | 0.6  | -0.7 | -0.9 | -2.7 | -5.7 |
|              | SREBF1,2:6720,6721                       | -1.3   | -1.9 | -3.1 | -4.1 | -2.9 | 1.3  | 4.1      | -2.9 | -4.9 | -5.4 | -4.9 | -5.5 | -3.6                   | -0.7 | -1.7 | -2.9 | -2.3 | -0.8 | -2.6 | -5.0 | -4.8 |
|              | SRF:6722                                 | 4.3    | 6.6  | 6.3  | 6.1  | 4.2  | 2.9  | 4.0      | 7.0  | 6.7  | 5.8  | 3.8  | 2.7  | 0.7                    | 0.4  | 2.6  | 0.1  | -0.5 | -2.3 | -1.5 | -2.1 | -3.7 |
|              | STAT1,3:6772,6774                        | -2.5   | 0.1  | -1.5 | -1.4 | -0.7 | 1.7  | 2.5      | -2.1 | -1.5 | -1.6 | -2.1 | -1.8 | -0.5                   | 0.1  | 0.4  | -1.6 | -0.1 | -0.7 | -1.1 | -2.2 | -2.3 |
|              | TBP:6908                                 | 9.0    | 5.9  | 5.5  | 4.2  | 0.4  | 0.3  | 3.5      | 11.3 | 9.9  | 8.1  | 2.3  | 0.6  | -3.5                   | -2.5 | 2.3  | 3.9  | 2.6  | -1.8 | 0.2  | -3.7 | -6.1 |
|              | TCF1:6927                                | 4.4    | 0.6  | 0.9  | 0.4  | -0.9 | 1.5  | 0.6      | 4.2  | 2.6  | 1.3  | -0.8 | -1.7 | -3.5                   | -3.4 | -0.2 | 2.0  | 0.4  | -1.2 | -0.8 | -5.0 | -4.1 |
|              | YY1:7528                                 | -6.4   | -2.1 | -4.0 | -3.0 | -1.4 | -0.6 | -1.0     | -2.1 | -3.2 | -4.2 | -1.1 | -0.5 | 1.2                    | 0.4  | 4.3  | -1.1 | -0.2 | 1.9  | 0.9  | 1.8  | 1.4  |
|              | ZNF143:7702                              | -7.3   | -3.0 | -4.5 | -4.3 | -1.5 | 2.0  | 0.3      | -4.7 | -5.2 | -5.5 | -1.7 | -2.0 | 0.6                    | 1.6  | 2.5  | -2.2 | -1.0 | 2.6  | -0.4 | -1.4 | 1.3  |
|              | ZNF148:7707                              | 5.0    | 3.1  | 3.4  | 2.0  | 0.8  | 0.8  | 0.8      | 5.7  | 4.0  | 2.2  | 1.2  | 0.8  | -0.9                   | -0.3 | 0.7  | 0.9  | -1.3 | -0.9 | 0.0  | -1.6 | -1.2 |
|              | ZNF238:10472                             | 3.5    | 0.3  | 1.6  | 0.2  | 0.2  | 1.4  | 2.3      | 3.5  | 2.5  | 2.2  | 0.2  | -0.5 | -2.4                   | -3.4 | 0.0  | 2.3  | 0.5  | 0.0  | -0.7 | -3.8 | -5.7 |
|              | ZNF278:23598                             | 3.1    | 3.3  | 4.7  | 2.2  | 0.9  | -0.9 | -0.7     | 6.2  | 4.4  | 1.8  | 1.2  | -0.2 | -2.3                   | -2.9 | 3.1  | 1.1  | -2.9 | -1.1 | -1.2 | -1.4 | -2.2 |
|              | ZNF42:7593                               | 2.9    | 0.8  | 0.9  | -0.8 | -0.8 | 0.1  | 0.5      | 2.7  | 0.5  | -0.7 | -0.6 | -1.7 | -3.0                   | -1.8 | -0.2 | -0.2 | -1.7 | 0.2  | -1.0 | -3.1 | -2.4 |
| UCSC         | V\$AML1_01:861                           | 2.0    | -0.8 | 0.0  | -1.2 | -1.0 | 0.5  | 0.8      | 2.1  | 1.2  | 1.5  | -1.0 | -1.9 | -2.1                   | -1.2 | 0.1  | 1.9  | 1.5  | 0.2  | -0.9 | -2.6 | -2.0 |
|              | V\$AP1_01:2353,8061,3725,3726,3727       | 4.9    | 6.0  | 6.6  | 4.4  | 2.9  | 2.6  | 3.1      | 5.9  | 7.2  | 6.9  | 3.8  | 3.4  | 2.4                    | 2.0  | 0.9  | 1.2  | 0.3  | -0.6 | 0.6  | -0.2 | -1.1 |
|              | V\$E2F_02:1869,1870,1871,1874,187C       | -2.3   | -0.7 | -3.3 | -4.5 | 2.4  | 3.2  | -3.6     | -0.7 | -2.8 | -4.7 | -4.0 | 1.0  | 5.6                    | 4.6  | 1.6  | -2.0 | -1.4 | 0.4  | -1.4 | 2.3  | 8.2  |
|              | V\$ELK1_01:2002                          | -3.5   | -1.1 | -1.9 | -2.3 | -0.8 | -0.8 | -2.4     | -2.6 | -1.4 | -1.3 | -0.9 | -2.1 | 0.3                    | 1.9  | 1.0  | -0.3 | 0.6  | 1.4  | -1.3 | 1.1  | 4.3  |
|              | V\$ELK1_02:2002                          | -6.8   | 1.3  | -0.5 | 0.8  | 4.0  | 4.3  | 4.0      | -4.2 | -1.4 | 0.6  | 2.3  | 3.5  | 8.0                    | 10.6 | 2.6  | -2.7 | 1.0  | 1.4  | -0.6 | 3.6  | 6.7  |
|              | V\$FOXO4_01:4303                         | -1.2   | -1.8 | -3.2 | -4.6 | -4.9 | -1.2 | -0.9     | -3.3 | -3.9 | -4.0 | -5.8 | -6.1 | -6.6                   | -4.0 | -2.1 | -2.1 | -0.8 | -1.2 | -1.2 | -5.5 | -3.1 |
|              | V\$FREAC2_01:2295                        | -0.7   | -4.0 | -3.8 | -5.8 | -5.8 | -1.5 | -2.2     | -1.7 | -3.1 | -3.8 | -5.6 | -6.7 | -7.4                   | -5.6 | -1.0 | 0.9  | 0.0  | 0.2  | -0.9 | -5.9 | -3.5 |
|              | V\$HNF1_01:6927                          | 2.6    | -1.8 | 0.1  | 0.8  | -0.4 | 0.9  | 0.5      | 3.3  | 1.5  | 0.7  | -0.2 | -0.3 | -2.3                   | -3.4 | 0.7  | 3.3  | 0.6  | -1.0 | 0.1  | -3.2 | -3.9 |
|              | V\$LMO2COM_02:4005                       | 0.6    | 0.2  | 1.0  | 0.7  | 0.2  | -0.8 | 1.3      | 2.9  | 2.3  | 2.4  | 1.3  | 0.9  | -0.1                   | -1.4 | 2.3  | 2.1  | 1.4  | 0.6  | 0.7  | 0.7  | -2.7 |

|                          |      |      |      |      |      |      |      |      |      |      |      |      |      |      |      |      |      |      |      |      |      |
|--------------------------|------|------|------|------|------|------|------|------|------|------|------|------|------|------|------|------|------|------|------|------|------|
| V\$MEF2_01:4205          | 4.1  | 2.1  | 3.3  | 2.1  | 1.5  | 0.8  | 1.0  | 4.4  | 4.3  | 2.9  | 0.5  | 1.2  | -0.6 | -0.9 | 0.4  | 2.2  | -0.5 | -1.6 | -0.3 | -1.4 | -1.8 |
| V\$MEF2_03:4205          | 3.0  | 1.2  | 0.5  | -1.0 | -0.2 | 0.5  | 1.6  | 1.1  | -0.1 | 0.1  | -3.0 | -2.5 | -3.8 | -3.2 | -1.9 | -1.3 | -0.4 | -2.0 | -2.3 | -4.3 | -4.8 |
| V\$MZF1_01:7593          | 1.0  | -0.1 | 1.3  | 2.8  | 2.2  | -1.7 | -0.4 | 2.5  | 3.0  | 2.2  | 2.0  | 1.8  | -0.1 | -0.8 | 1.4  | 3.0  | 0.9  | -0.8 | -0.4 | 1.6  | -0.4 |
| V\$NFY_C:4800,4801       | -2.5 | -1.7 | -2.4 | -3.5 | -0.1 | 0.6  | -2.7 | -1.8 | -2.5 | -2.7 | -1.9 | -1.6 | 2.4  | 3.8  | 0.7  | -0.9 | -0.3 | 1.6  | -1.5 | 1.7  | 6.5  |
| V\$NFY_Q6:4800,4801,4802 | -3.6 | -3.3 | -4.5 | -5.2 | -2.8 | -3.7 | -6.3 | -1.7 | -2.9 | -5.5 | -5.2 | -3.2 | -0.7 | 2.9  | 1.9  | 0.5  | -0.9 | 0.0  | -0.4 | 3.0  | 9.2  |
| V\$POU3F2_01:5454        | 4.0  | 1.2  | 2.0  | 2.3  | 0.9  | 1.7  | 1.1  | 0.8  | 1.2  | 1.1  | 1.8  | 1.6  | -0.5 | -0.2 | -3.2 | -0.1 | -0.9 | -0.5 | 0.6  | -2.3 | -1.2 |
| V\$RP58_01:10472         | 2.5  | -0.9 | 1.3  | 0.6  | -1.6 | 0.4  | 1.3  | 3.2  | 2.4  | 2.1  | 1.0  | 0.3  | -1.6 | -2.9 | 0.7  | 3.2  | 0.8  | 0.4  | 2.0  | -2.0 | -4.2 |
| V\$SREBP1_01:6720        | -2.1 | -1.6 | -2.9 | -4.9 | -3.2 | 0.7  | 2.4  | -3.9 | -5.0 | -6.2 | -5.4 | -6.6 | -4.7 | -2.9 | -1.7 | -3.4 | -3.3 | -0.5 | -3.4 | -5.4 | -5.3 |
| V\$SRF_01:6722           | 4.4  | 5.3  | 4.7  | 4.3  | 3.4  | 2.8  | 3.1  | 4.6  | 4.4  | 4.1  | 2.3  | 2.0  | 0.1  | -1.1 | 0.2  | -0.9 | -0.5 | -2.1 | -1.4 | -2.7 | -4.2 |
| V\$STAT3_01:6774         | -3.0 | 0.1  | -0.7 | -0.1 | 0.8  | 1.5  | -0.5 | 1.2  | 1.1  | 0.3  | 1.0  | 2.0  | 3.6  | 4.1  | 4.2  | 0.9  | 1.0  | 1.1  | 1.2  | 2.1  | 4.6  |
| V\$TATA_01:6908          | 5.7  | 3.8  | 4.0  | 2.8  | 1.5  | 0.1  | 0.1  | 7.1  | 6.8  | 5.6  | 1.8  | 1.3  | -1.2 | -1.8 | 1.4  | 3.0  | 1.6  | -1.0 | -0.2 | -1.3 | -2.0 |
| V\$TATA_C:6908           | 5.7  | 3.7  | 3.5  | 3.2  | 1.3  | 0.6  | 2.2  | 5.1  | 5.1  | 3.9  | 1.1  | 1.2  | -1.7 | -1.8 | -0.7 | 1.3  | 0.4  | -2.0 | 0.0  | -2.3 | -4.0 |
| V\$YY1_02:7528           | -5.7 | -3.2 | -4.3 | -4.1 | -0.6 | -0.6 | -1.4 | -6.7 | -7.0 | -7.0 | -2.9 | -1.6 | 0.3  | 1.7  | -1.0 | -3.7 | -2.7 | 1.1  | -1.0 | 0.9  | 3.1  |
