# Supplementary material
Source: PubMed Central journal article supplement (PMC3013041)
Supplement: supp_M110.156877_jbc.M110.156877-5.pdf [file supp_M110.156877_jbc.M110.156877-5.pdf]

| Transcription factor<br>Symbol | Motif score |   |     |   | Known and putative regulators                                                                                                                           |
|--------------------------------|-------------|---|-----|---|---------------------------------------------------------------------------------------------------------------------------------------------------------|
|                                | E2          |   | HRG |   |                                                                                                                                                         |
|                                | S           | U | S   | U |                                                                                                                                                         |
| ATF5                           |             |   |     |   | -                                                                                                                                                       |
| CREB1                          |             |   |     |   | ATM, ATR, CIITA, CSNK1A1, CSNK2A1, GSK3B, MAPK1, MAPK3, MAPKAPK2, PRKACA, PRKCB, PRKCE, PRKD1, RPS6KA1, RPS6KA2, RPS6KA3, RPS6KA4, RPS6KA5, SGK1, TSSK4 |
| CREB3                          |             |   |     |   | GSK3B                                                                                                                                                   |
| E2F1                           |             |   |     |   | ATM, ATR, CDC2, CDK2, CDK7, CHEK2, GSK3B, LOC651610, MAPK1, MAPK11, MAPK14, PRKCA, PRKDC                                                                |
| E2F2                           |             |   |     |   | -                                                                                                                                                       |
| E2F3                           |             |   |     |   | -                                                                                                                                                       |
| E2F4                           |             |   |     |   | -                                                                                                                                                       |
| E2F5                           |             |   |     |   | -                                                                                                                                                       |
| ELF1                           |             |   |     |   | CDC2                                                                                                                                                    |
| ELF2                           |             |   |     |   | -                                                                                                                                                       |
| ELF4                           |             |   |     |   | CDK2                                                                                                                                                    |
| ELK1                           |             |   |     |   | CDK2, GSK3B, MAPK1, MAPK10, MAPK11, MAPK12, MAPK13, MAPK14, MAPK3, MAPK8, MAPK9, PRPF4E                                                                 |
| ELK4                           |             |   |     |   | MAPK1, MAPK11, MAPK12, MAPK13, MAPK14, MAPK3                                                                                                            |
| FOS                            |             |   |     |   | CDK2, IKBKB, MAPK1, MAPK3, MAPK7, MAPK9, PRKCA, RPS6KA1                                                                                                 |
| FOSL1                          |             |   |     |   | -                                                                                                                                                       |
| FOXF2                          |             |   |     |   | -                                                                                                                                                       |
| FOXO1                          |             |   |     |   | AKT1, AKT2, AKT3, CDC2, CDK2, CSNK1A1, DYRK1A                                                                                                           |
| FOXO3                          |             |   |     |   | AKT1, AKT2, AKT3, CHUK, IKBKB, MAPK1, MAPK3, PIM1, SGK1, STK4                                                                                           |
| FOXO4                          |             |   |     |   | AKT1, MAPK8, MAPK9                                                                                                                                      |
| GABPA                          |             |   |     |   | -                                                                                                                                                       |
| GABPB1                         |             |   |     |   | -                                                                                                                                                       |
| GATA4                          |             |   |     |   | PRKACA                                                                                                                                                  |
| HNF1A                          |             |   |     |   | DYRK1B                                                                                                                                                  |
| JUN                            |             |   |     |   | ABL1, CDK3, CSNK2A1, GSK3B, MAPK1, MAPK10, MAPK3, MAPK8, MAPK9, PRKD1, VRK1                                                                             |
| JUNB                           |             |   |     |   | GSK3B, MAPK8                                                                                                                                            |
| JUND                           |             |   |     |   | CDC2, GSK3B, MAPK1, MAPK10, MAPK14, MAPK8, MAPK9                                                                                                        |
| LMO2                           |             |   |     |   | -                                                                                                                                                       |
| MAZ                            |             |   |     |   | ATM, CSNK2A1, LOC651610, MAPK3, PRKDC                                                                                                                   |
| MEF2A                          |             |   |     |   | CDC2, CDK5, CSNK2A1, GSK3B, MAPK10, MAPK14, MAPK7                                                                                                       |
| MZF1                           |             |   |     |   | -                                                                                                                                                       |
| NFYA                           |             |   |     |   | CIITA                                                                                                                                                   |
| NFYB                           |             |   |     |   | CIITA                                                                                                                                                   |
| NFYC                           |             |   |     |   | CIITA                                                                                                                                                   |
| NRF1                           |             |   |     |   | -                                                                                                                                                       |
| PATZ1                          |             |   |     |   | -                                                                                                                                                       |
| POU3F2                         |             |   |     |   | -                                                                                                                                                       |
| RUNX1                          |             |   |     |   | CDC2, CDK2, CDK6, GSK3B, HIPK2, MAPK1, MAPK14, MAPK3                                                                                                    |
| SNAI1                          |             |   |     |   | GSK3B, PAK1                                                                                                                                             |
| SNAI2                          |             |   |     |   | -                                                                                                                                                       |
| SNAI3                          |             |   |     |   | -                                                                                                                                                       |
| SREBF1                         |             |   |     |   | CDC2, GSK3B, MAPK1, MAPK3, PRKACA                                                                                                                       |
| SRF                            |             |   |     |   | ATM, CAMK2A, CSNK1D, CSNK2A1, DMPK, LOC651610, MAPKAPK2, PRKACA, PRKCA, PRKDC, PRKG1                                                                    |
| STAT3                          |             |   |     |   | ALK, CDK2, CISH, FER, FLT3, GSK3B, IRAK1, JAK1, JAK2, JAK3, KIT, MAPK14, MAPK8, PIAS1, PIAS2, PIAS3, PIAS4, RPS6KA3, TYK2                               |
| TBP                            |             |   |     |   | -                                                                                                                                                       |
| YY1                            |             |   |     |   | -                                                                                                                                                       |
| ZNF143                         |             |   |     |   | -                                                                                                                                                       |
| ZNF148                         |             |   |     |   | ATM                                                                                                                                                     |
| ZNF238                         |             |   |     |   | -                                                                                                                                                       |
