# Supplementary material
Source: PubMed Central journal article supplement (PMC3013041)
Supplement: supp_M110.156877_jbc.M110.156877-6.pdf [file supp_M110.156877_jbc.M110.156877-6.pdf]

|                       | pGSK3 $\beta$ (S9) immunoreactivity |                | <i>P</i> value |
|-----------------------|-------------------------------------|----------------|----------------|
|                       | +(n = 48)                           | -(n = 34)      |                |
| Patient age*          | 58.2 $\pm$ 1.8                      | 52.9 $\pm$ 1.9 | <b>0.02</b>    |
| Menopausal status     |                                     |                |                |
| Premenopause          | 11                                  | 16             |                |
| Postmenopause         | 37                                  | 18             | <b>0.02</b>    |
| Clinical stage        |                                     |                |                |
| I                     | 17                                  | 4              |                |
| II                    | 19                                  | 19             |                |
| III                   | 12                                  | 11             | <b>0.04</b>    |
| Tumor size (mm)*      | 46.9 $\pm$ 10.3                     | 33.9 $\pm$ 3.3 | 0.28           |
| Lymph node metastasis |                                     |                |                |
| Positive              | 16                                  | 17             |                |
| Negative              | 32                                  | 17             | 0.13           |
| Histological grade    |                                     |                |                |
| 1                     | 8                                   | 13             |                |
| 2                     | 28                                  | 14             |                |
| 3                     | 12                                  | 7              | 0.09           |
| ER LI*                | 67.6 $\pm$ 4.0                      | 61.9 $\pm$ 4.3 | 0.34           |
| PR LI*                | 36.2 $\pm$ 4.8                      | 45.4 $\pm$ 4.9 | 0.20           |
| HER2                  |                                     |                |                |
| Positive              | 6                                   | 2              |                |
| Negative              | 42                                  | 32             | 0.31           |
| Ki-67 LI*             | 18.7 $\pm$ 2.3                      | 17.4 $\pm$ 2.5 | 0.71           |

\*; The values were presented as mean  $\pm$  SE.
