# Supplementary material
Source: PubMed Central journal article supplement (PMC3013041)

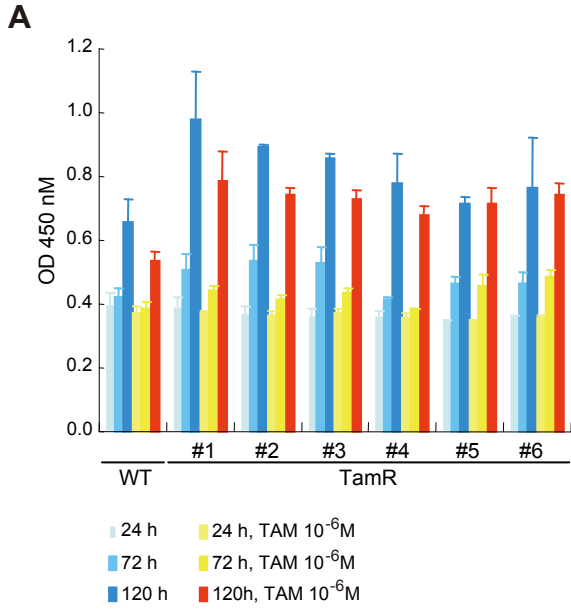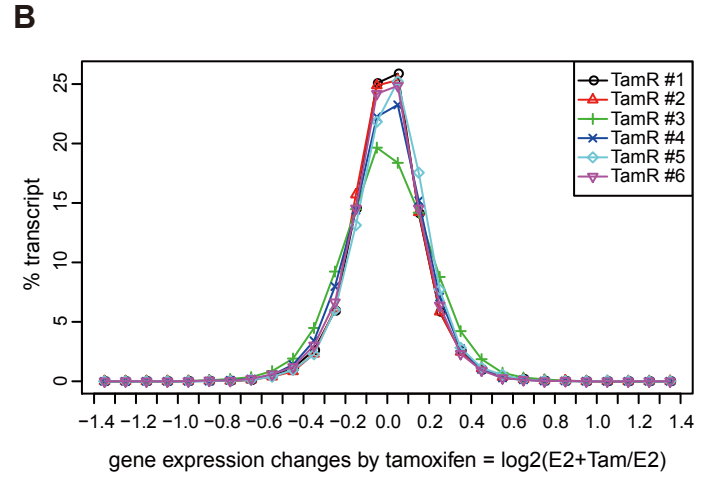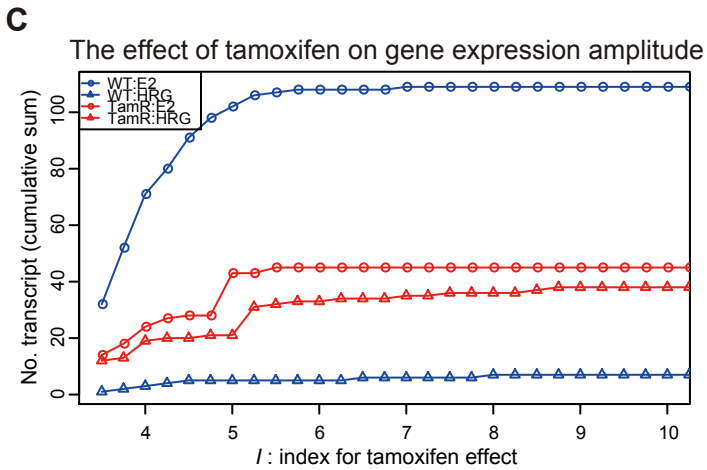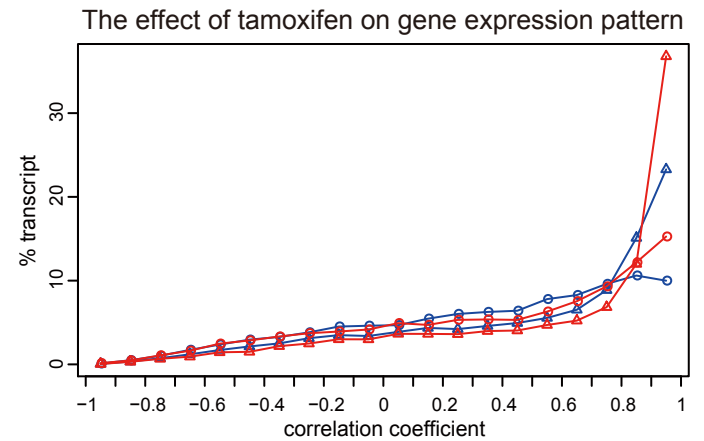

Supplement: supp_M110.156877_jbc.M110.156877-1.pdf [file supp_M110.156877_jbc.M110.156877-1.pdf]

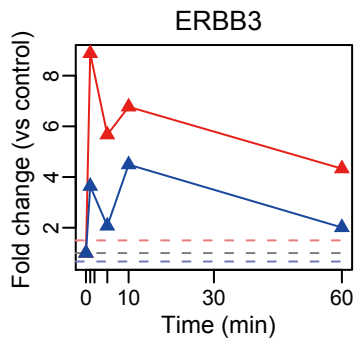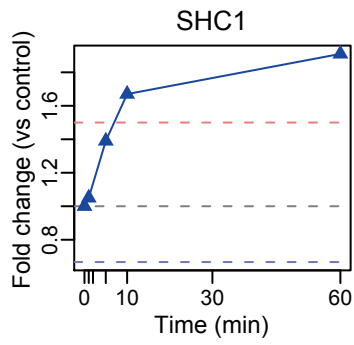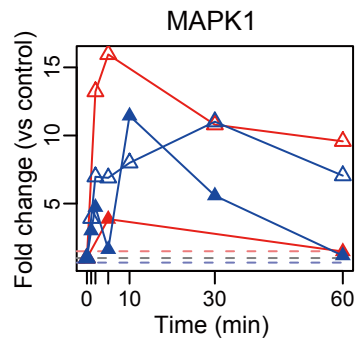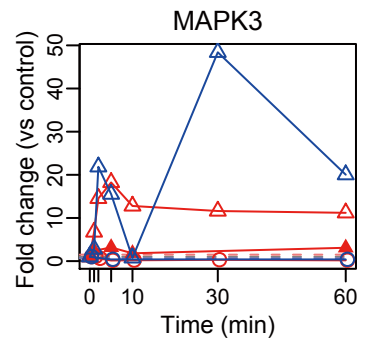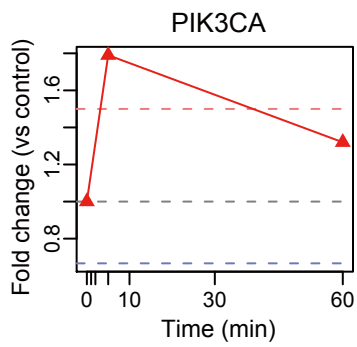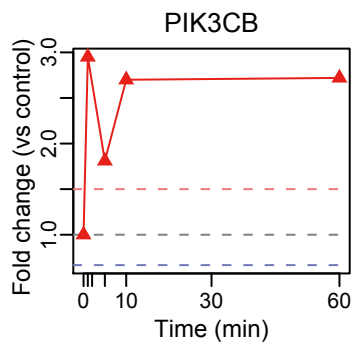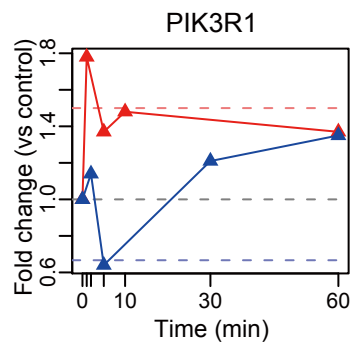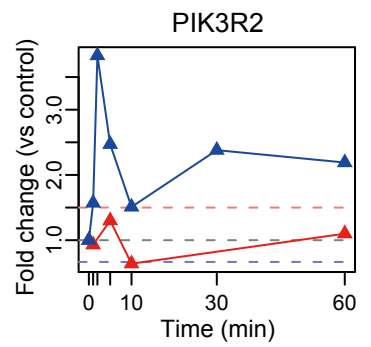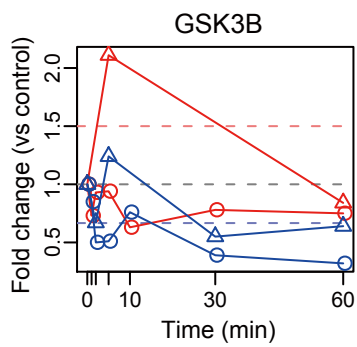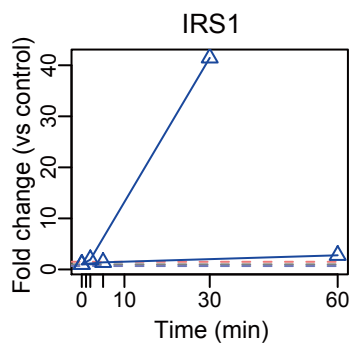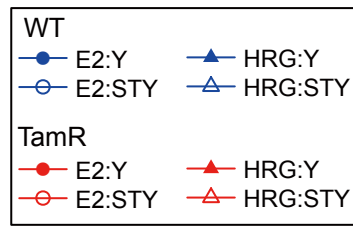

Supplement: supp_M110.156877_jbc.M110.156877-2.pdf [file supp_M110.156877_jbc.M110.156877-2.pdf]
